# Supplementary material for: Activation of a neural stem cell transcriptional program in parenchymal astrocytes
Source: eLife. 2020 Aug 3;9:e59733. doi: 10.7554/eLife.59733 (PMC7440914; doi:10.7554/eLife.59733)
Supplement: Source data 1. [file elife-59733-data1.xlsx]

## Sheet: Figure 2-figure supplement 3
Figure 2-figure supplement 3
SVZ Single Ascl1+	SVZ Clustered Ascl1+	Striatum Single Ascl1+	Striatum Clustered Ascl1+
14	10	38	22
10	6	67	25
15	11	19	20
14	12	63	27
7	14	63	27
7	15	42	17
9	10	17	16
9	9	6	66
8	12	13	39
13	9	12	33
16	8	9	31
19	15	27	31
11	18	15	10
11	12	82	9
13	8	114	20
12	11	53	12
22	12	95	19
17	9	61	15
23	18	54	10
17	11	115	11
7	11	28	9
8	16	75	12
9	21	107	10
7	13	18	9
9	8	19	31
14	18	52	34
7	16	151	26
9	15	29	30
5	12	42	22
11	12	40	49
11	12	40	5
11	9	118	8
10	16	100	8
6	14	141	15
12	11	141	15
18	11	85	12
8	10	157	11
6	12	162	10
8	16	68	101
12	14	143	66
11	11	134	54
21	20	116	17
13	16	63	38
16	15	132	29
12	16	110	14
20	14	7	15
13	11	8	14
15	7	11	13
14	9	10	15
15	9	6	20
9	10	30	43
8	10	6	52
11	11	5	25
14	15	7	28
8	17	5	10
8	19	8	12
19	18	64	38
11	17	70	33
23	10	51	14
22	19	86	100
22	20	15	131
11	18	89	28
22	12	88	30
13	11	43	41
19	10	62	29
11	15	100	31
5	13	12	29
11	13	72	43
9	12	69	45
16	13	44	28
25	12	100	27
22	14	75	46
10	14	71	23
13	16	50	28
9	11	63	39
13	10	18	41
14	8	21	155
10	10	22	112
7	15	18	104
13	12	11	33
14	22	45	35
25	15	75	25
19	22	76	38
12	14	14	53
11	16	57	76
18	22	64	106
25	12	35
	10	18
	18	95
	18	31
	12	32
	11	60
	9	74
	7	90
	7	77
	9	42
	11	71
	21	77
	28	81
	18	93
	16	56
	22	95
	24	52
	13	90
	15	121
	14	120
	13	14
	10	12
	9	14
	7	17
	14	27
	12	59
	12	60
	8	131
	9	52
	15	62
	15	94
	16	56
	17	94
	10	138
	8	139
	28	41
	19	56
	15	117
	12	9
	17	71
	22	79
	10	163
	15	163
	32	119
	15	106
	17	127
	17	131
	22	102
	18	119
	22	94
	29	114
	15	93
	25	78
	18	72
	28	109
	21	16
	26	47
	17	104
	16	85
	16	31
	17	99
		69
		118
		195
		152
		110
		103
		67
		87
		152
		72
		112
		68
		123
		141
		99
		117
		91
		131
		178
		68

## Sheet: Figure 5m
To Striatum	To Cortex
23	21
74	6
19	0
45	3
68	6
27	0
50	0
29	17
23	4
6	18
32	50
70	66
69	4
44	20
67	50
60	61
64	11
46
69
81
67
61
71
74
62
38
63

## Sheet: Figure 5n
To Striatum	To Cortex
11	2
21	1
10	0
35	0
18	5
30	0
0	0
13	0
9	0
7	0
0	0
0	1
6	10
8	2
0	3
11	3
13	0
2
14
7
22
12
3
1
0
11

## Sheet: Figure 6d
Control (PBS)	EGF
42	184
138.33	283
34	75.67
147	322

## Sheet: Figure 6e
EGF side	PBS side
25	7.66667
32.3333	11.6667
8.33333	1.66667
17	12

## Sheet: Figure 6f
CellsPerCluster_EGF	CellsPerCluster_PBS
15	16
7	9
10	7
16	8
8	10
21	7
18	13
49	12
6	7
11	13
71	8
10	23
17	20
16	26
11	10
7	14
10	32
24	20
19	24
19	11
18	18
8	25
18	9
42	20
10	8
11	10
43	13
7	11
12	9
20	9
31	12
30	14
12	40
24	9
9	9
9	26
12	31
24	21
35	8
14	21
19	19
21	30
50	13
11	62
17	11
8	49
20	13
8	17
11	38
8	9
28	23
16	11
16	26
7	10
23	12
21	7
32	13
13	14
9	14
9	53
9	13
18	32
17	8
27	20
9	24
26	10
26	11
55	12
8	12
31	17
11	12
18	14
17	10
28	8
9	15
13	9
10	8
20	19
7	12
15	29
23	26
35	9
7	23
8	15
9	16
8	12
38	13
9	12
21	18
7	12
7	21
14	20
22	27
44	14
7	29
36	24
17	26
12	7
11	21
18
9
19
15
24
40
11
11
26
19
11
13
10
8
14
13
10
16
9
22
27
24
27
75
12
7
13
28
13
8
52
22
30
17
19
19
15
10
33
21
9
20
17
53
8
9
18
22
22
34
14
24
7
24
28
26
23
23
38
65
7
12
17
18
15
29
20
15
26
80
12
7
7
10
11
34
21
23
12
14
7
10
12
22
8
12
18
9
17
32
16
16
21
11
22
23
7
24
37
11
13
9
13
41
22
36
11
10
13
40
13
8
21
10
7
19
36
18
28
18
31
14
32
7
21
20
9
7
15
16
13
7
8
12
46
10
12
10
7
7
12
7
9
39
10
25
11
9
12

## Sheet: Figure 6h
PBS	EGF
37.5	67.5
34	92
12	21
82.5	86.5

## Sheet: Figure 6i
Control Side	EGF Side
1.82927	1.58491
1.36364	1.48718
2.125	1.6129
2.54546	2.36667
2.375	1.40741
2.65116	2.27692
4.62791	2.51724
2.42	2.57692
2.15789	1.34694
2.44444	4.12821
1.60976	1.92105
1.95402	1.60563
1.91667	1.47619
2.32143	4.34211
1.10256	3.55208
1.59091	3.20779
1.9	2.86441
1.55	3.67213
0.850575	1.04878
2.33333	3.46429
1.22727	2.94
1.55172
1.25	1.2
1.23077	2.2549
1.84211	1.79167
3.6	3.13333
4.27907	2.54167
0.97561	1.70833
2.45455	1.875
1.57692	1.4
2.06061	3.86274
1.96552	2
	1.0625
	2.95455
	1.6129
	2.61446
	2.19444
	2.22857
	3.63636

## Sheet: Figure 6-figure supplement 1c
Mouse	Genotype	File	TotalArea	MeanIntensity	TotalIntensity	ThresCorrFact	RatioLvsR	AvgRatioLvsR	PercentOfTotalDcxOnEGFside	AvgPercent	AnteriorPercentOfTotalDcxOnEGFside	AvgPercent	FoldDifference	AvgFoldDifference	EGF_NormalizedTotalIntensity	Vehicle_NormalizedTotalIntensity	EGF_SumIntensityPerMouse	Vehicle_SumIntensityPerMouse	RatioSumEGF/Vehicle
259	HET	259_1_L	22491	0.2382	5358.26	0.19	1.20308	1.37042	0.54609	0.576021	0.576021		1.20308	1.37042	1	0.831199	2	1.48149	1.34999
259	HET	259_1_R	19456	0.2289	4453.78	0.19	NA	NA	NA	NA			NA
259	HET	259_2_L	18432	0.2871	5292.06	0.52	1.53776	NA	0.605952	NA			1.53776		1	0.650295
259	HET	259_2_R	12835	0.2681	3441.4	0.52	NA	NA	NA	NA			NA
260	HET	260_0_L	11578	0.2557	2960	0.2	0.66472	1.30199	0.399299	0.452659	0.494171		-1.50439	-0.534311	0.66472	1	2.94281	3.35134	0.878099
260	HET	260_0_R	16970	0.2624	4453	0.2	NA	NA	NA	NA			NA
260	HET	260_1_L	14662	0.2486	3645	0.3	1.43335	NA	0.589043	NA			1.43335		1	0.697668
260	HET	260_1_R	9803	0.2594	2543	0.25	NA	NA	NA	NA			NA
260	HET	260_2_L	13275	0.2279	3026	0.2	1.52983	NA	0.604716	NA			1.52983		1	0.653668
260	HET	260_2_R	7471	0.2648	1978	0.2	NA	NA	NA	NA			NA
260	HET	260_3_L	1486	0.203	302	0.15	0.278085	NA	0.217579	NA			-3.59603		0.278085	1
260	HET	260_3_R	5821	0.1866	1086	0.45	NA	NA	NA	NA			NA
262	HET	262_1_L	8063	0.2352	1897	0.2	0.700517	1.5977	0.411944	0.557527	0.582997		-1.42752	0.888351	0.700517	1	2.70052	2.30016	1.17406
262	HET	262_1_R	11704	0.2314	2708	0.25	NA	NA	NA	NA			NA
262	HET	262_2_L	14270	0.3392	4841	0.45	3.06586	NA	0.75405	NA			3.06586		1	0.326172
262	HET	262_2_R	4871	0.3241	1579	0.45	NA	NA	NA	NA			NA
262	HET	262_3_L	14813	0.3218	4767	0.5	1.02671	NA	0.506589	NA			1.02671		1	0.973988
262	HET	262_3_R	15821	0.2922	4643	0.3	NA	NA	NA	NA			NA
263	HET	263_1_L	12402	0.3055	3789	0.3	0.807545	1.17793	0.446763	0.527174	0.527174		-1.23832		0.807545	1	1.80754	1.64586	1.09824
263	HET	263_1_R	18170	0.2582	4692	0.5	NA	NA	NA	NA			NA
263	HET	263_2_L	8789	0.4192	3685	0.7	1.54832	NA	0.607585	NA			1.54832		1	0.645862
263	HET	263_2_R	5322	0.4471	2380	0.5	NA	NA	NA	NA			NA
271	HET	271_1_L	15545	0.2464	3830	0.5	1.81087	0.917286	0.644239	0.426073	0.503115		1.81087		1	0.552219	1.94098	2.55222	0.760508
271	HET	271_1_R	7486	0.2825	2115	0.25	NA	NA	NA	NA			NA
271	HET	271_2_L	6870	0.2126	1461	0.2	0.567379	NA	0.361992	NA			-1.76249		0.567379	1
271	HET	271_2_R	12079	0.2132	2575	0.5	NA	NA	NA	NA			NA
271	HET	271_3_L	4707	0.2275	1070	0.7	0.373603	NA	0.271988	NA			-2.67664		0.373603	1
271	HET	271_3_R	12848	0.2229	2864	0.5	NA	NA	NA	NA			NA
333	HOM	333_1_L	21289	0.2789	5937	0.4	2.28786	1.14446	0.695851	0.500551	0.586728		2.28786		1	0.437089	5.2272	5.14291	1.01639
333	HOM	333_1_R	9878	0.22627	2595	0.4	NA	NA	NA	NA			NA
333	HOM	333_2_L	16179	0.2814	4553	0.4	0.914257	NA	0.477604	NA			-1.09378		0.914257	1
333	HOM	333_2_R	17395	0.2863	4980	0.2	NA	NA	NA	NA			NA
333	HOM	333_3_L	13079	0.2925	3825	0.4	0.962991	NA	0.490573	NA			-1.03843		0.962991	1
333	HOM	333_3_R	14739	0.2695	3972	0.5	NA	NA	NA	NA			NA
333	HOM	333_4_L	20084	0.341	6849	0.4	1.11257	NA	0.526644	NA			1.11257		1	0.898817
333	HOM	333_4_R	16918	0.3639	6156	0.4	NA	NA	NA	NA			NA
333	HOM	333_5_L	17909	0.2456	4399	0.35	1.23915	NA	0.553403	NA			1.23915		1	0.807002
333	HOM	333_5_R	11920	0.2978	3550	0.63	NA	NA	NA	NA			NA
333	HOM	333_6_L	3954	0.2575	1018	0.5	0.349948	NA	0.259231	NA			-2.85756		0.349948	1
333	HOM	333_6_R	11080	0.2625	2909	0.35	NA	NA	NA	NA			NA
337	HOM	337_1_L	35261	0.2602	9177	0.2	1.61738	1.34516	0.617938	0.554887	0.620226		1.61738		1	0.618285	4.54309	3.61727	1.25594
337	HOM	337_1_R	22189	0.2557	5674	0.26	NA	NA	NA	NA			NA
337	HOM	337_2_L	24238	0.2195	5320	0.15	1.6491	NA	0.622513	NA			1.6491		1	0.606391
337	HOM	337_2_R	15389	0.2096	3226	0.15	NA	NA	NA	NA			NA
337	HOM	337_3_L	13529	0.2257	3053	0.15	1.637	NA	0.620781	NA			1.637		1	0.610875
337	HOM	337_3_R	8354	0.2233	1865	0.15	NA	NA	NA	NA			NA
337	HOM	337_4_L	11197	0.4143	4638	0.6	0.543091	NA	0.35195	NA			-1.84131		0.543091	1
337	HOM	337_4_R	21833	0.3912	8540	0.6	NA	NA	NA	NA			NA
337	HOM	337_5_L	12977	0.1931	2506	0.62	1.27922	NA	0.561254	NA			1.27922		1	0.781724
337	HOM	337_5_R	10386	0.1886	1959	0.35	NA	NA	NA	NA			NA
338	HOM	338_1_L	21127	0.282	5958	0.2	0.851508	1.12002	0.4599	0.518719	0.44835		-1.17439		0.851508	1	4.62708	4.33746	1.06677
338	HOM	338_1_R	21512	0.3253	6997	0.35	NA	NA	NA	NA			NA
338	HOM	338_2_L	19573	0.1736	3397	0.45	0.775571	NA	0.436801	NA			-1.28937		0.775571	1
338	HOM	338_2_R	18177	0.241	4380	0.3	NA	NA	NA	NA			NA
338	HOM	338_3_L	11791	0.261	3079	0.27	1.43476	NA	0.589282	NA			1.43476		1	0.69698
338	HOM	338_3_R	6608	0.3249	2146	0.2	NA	NA	NA	NA			NA
338	HOM	338_4_L	10826	0.2516	2724	0.3	1.52094	NA	0.603322	NA			1.52094		1	0.657489
338	HOM	338_4_R	6742	0.2658	1791	0.55	NA	NA	NA	NA			NA
338	HOM	338_5_L	9702	0.206	1999	0.15	1.0173	NA	0.504289	NA			1.0173		1	0.982992
338	HOM	338_5_R	8863	0.2217	1965	0.25	NA	NA	NA	NA			NA
341	HOM	341_1_L	32695	0.3037	9930	0.4	1.2126	0.975874	0.548043	0.490079	0.495978		1.2126		1	0.824673	2.71502	2.82467	0.96118
341	HOM	341_1_R	31338	0.2613	8189	0.2	NA	NA	NA	NA			NA
341	HOM	341_2_L	25764	0.2917	7515	0.35	0.798279	NA	0.443913	NA			-1.25269		0.798279	1
341	HOM	341_2_R	27448	0.343	9414	0.35	NA	NA	NA	NA			NA
341	HOM	341_3_L	21458	0.3356	7201	0.35	0.916741	NA	0.478281	NA			-1.09082		0.916741	1

## Sheet: Figure 6-figure supplement 1d
	S100B+			S100B-
	Mean	SD	N	Mean	SD	N
PBS only	6.66914	5.64375	5	91.3309	56.1902	5
EGF in PBS	7.56856	3.07761	5	50.2314	10.7225	5

[truncated: 1 more sheets: Figure 6-figure supplement 1e]
