# Supplementary material for: Activation of a neural stem cell transcriptional program in parenchymal astrocytes
Source: eLife. 2020 Aug 3;9:e59733. doi: 10.7554/eLife.59733 (PMC7440914; doi:10.7554/eLife.59733)
Supplement: Supplementary file 1. — Data is shown for both striatum and somatosensory cortex. Astrocytes at the pre-division stage are in their most stem cell-like state. Therefore, genes differentially expressed at this time point represent potential marker genes for the astrocyte stem cell state. [file elife-59733-supp1.xlsx]

## Sheet: Striatum_GroundStateVs2wRbpjKO
	lb (lower bound for expression-fold change)	mle (maximum likelihood estimate for expression-fold change)	ub (upper bound for expression-fold change)	ce (conservative estimate for expression-fold change)	Z (uncorrected Z score of expression difference)	cZ (expression difference Z-score corrected for multiple hypothesis testing using Holm procedure)
Tbata	1.68803	2.26133	2.80277	1.68803	7.16081	5.92999		Higher in ground-state striatum
Ubc	1.65618	2.29318	3.05757	1.65618	7.16081	5.92999
5031426D15Rik	1.30584	1.81543	2.32503	1.30584	7.14814	5.92999
Galntl6	1.08289	1.59248	2.07023	1.08289	6.79322	5.55147
Paip1	1.05104	1.52879	2.00653	1.05104	6.66287	5.43274
Comt	0.955491	1.46509	1.91098	0.955491	6.29858	5.01978
Cldn19	1.05104	1.62433	2.13393	1.05104	5.93826	4.62641
Fhl3	0.859942	1.36954	1.84728	0.859942	5.54581	4.1717
Lrrc8a	0.764393	1.24214	1.68803	0.764393	5.49497	4.13985
Gnb1	0.923641	1.52879	2.07023	0.923641	5.48927	4.13985
Plxna3	2.89832	5.60555	6.78398	2.89832	5.40051	4.04279
Hsf2	0.668844	1.17844	1.62433	0.668844	4.83483	3.50361
Dnm3os	4.7456	5.3826	5.89219	4.7456	4.82714	3.50206
Lrp4	0.668844	1.17844	1.65618	0.668844	4.76307	3.44888
Ndufs5	1.36954	4.96855	6.14699	1.36954	4.67902	3.35107
Sod3	3.24867	8.05797	8.59942	3.24867	4.62228	3.28775
Rapgef4	0.605144	1.11474	1.59248	0.605144	4.62139	3.28775
Gata3	4.61821	5.2552	5.76479	4.61821	4.43484	3.05284
Plau	0.509595	0.98734	1.40139	0.509595	4.20427	2.76809
Prtg	0.509595	0.98734	5.92404	0.509595	4.14547	2.68972
Prr15	0.477745	0.98734	1.46509	0.477745	4.02509	2.53274
AI593442	0.509595	1.05104	1.59248	0.509595	3.95302	2.44468
5830416I19Rik	0.509595	1.08289	1.65618	0.509595	3.8912	2.36391
Nfia	0.445896	0.955491	1.43324	0.445896	3.84382	2.31049
Cisd3	0.445896	0.98734	1.46509	0.445896	3.79093	2.24121
Ogfrl1	0.445896	0.98734	1.52879	0.445896	3.70069	2.11793
Cbx3	0.350347	0.828092	1.24214	0.350347	3.62284	2.0295
9030612E09Rik	0.382196	0.923641	1.40139	0.382196	3.61171	2.02315
Chrm4	1.05104	5.2552	5.76479	1.05104	3.49426	1.89729
Ric8b	3.40792	5.89219	7.07063	3.40792	3.4574	1.85614
Kcnq1ot1	0.350347	0.859942	1.33769	0.350347	3.44541	1.84931
Gm5766	0.350347	0.796242	5.5737	0.350347	3.44384	1.84931
Thg1l	0.318497	0.796242	1.24214	0.318497	3.28292	1.63488
Abcg1	1.24214	5.15965	5.66924	1.24214	3.26078	1.61046
Mllt1	3.69456	5.41445	7.16618	3.69456	3.24821	1.59778
Ttc17	2.38873	5.60555	7.58023	2.38873	3.19237	1.52964
Exoc8	0.286647	0.828092	1.33769	0.286647	3.17616	1.51573
Ikbkb	4.23601	5.73294	7.67578	4.23601	3.15208	1.47731
Dusp23	0.254798	0.732543	1.17844	0.254798	3.14155	1.46551
Ubxn8	3.98121	6.97508	7.64393	3.98121	3.14064	1.46551
Man2b1	4.01306	5.92404	7.61208	4.01306	3.10578	1.41991
B630005N14Rik	0.254798	0.764393	1.27399	0.254798	3.09404	1.40687
Fam160a2	2.77092	5.22335	6.81583	2.77092	3.08297	1.39825
Rbm47	0.573294	5.70109	6.14699	0.573294	3.07789	1.39825
Wbscr25	0.254798	0.764393	1.21029	0.254798	3.04983	1.37544
Tmpo	2.70722	5.22335	6.91138	2.70722	3.03974	1.36786
Rad51c	0.541445	1.43324	5.60555	0.541445	3.03383	1.36786
Zfp937	0.222948	0.700693	1.14659	0.222948	3.03209	1.36786
4930463O16Rik	0.605144	1.40139	2.35688	0.605144	3.03113	1.36786
Ptges2	0.98734	2.42058	8.02612	0.98734	3.0033	1.35037
Lrch4	2.13393	5.35075	6.68844	2.13393	2.94334	1.29245
Far1	1.43324	7.38913	7.99427	1.43324	2.92588	1.27359
Atxn1	0.222948	0.732543	1.17844	0.222948	2.90926	1.24617
Thap11	2.00653	6.30624	7.61208	2.00653	2.89615	1.23167
Sparcl1	0.159248	0.573294	0.796242	0.159248	2.88873	1.22758
Wtap	0.191098	0.700693	1.14659	0.191098	2.88053	1.22471
Tsc22d3	0.286647	1.01919	1.84728	0.286647	2.86895	1.22471
Mirc35hg	0.477745	5.22335	5.76479	0.477745	2.85906	1.22192
Slx1b	0.222948	0.732543	1.24214	0.222948	2.83697	1.20698
Pdxp	0.318497	5.70109	7.35728	0.318497	2.82851	1.2029
Fem1b	0.222948	5.73294	6.94323	0.222948	2.81881	1.2008
Tyw5	1.71988	6.65659	7.35728	1.71988	2.81678	1.2008
Sult1a1	0.764393	2.26133	3.79011	0.764393	2.81657	1.2008
Bean1	0.509595	5.0004	5.54185	0.509595	2.81555	1.2008
Acbd5	1.05104	7.42098	7.96242	1.05104	2.8104	1.2008
Ndrg4	0.955491	7.22988	7.83502	0.955491	2.80692	1.2008
Hist1h2af	0.191098	0.636994	5.6374	0.191098	2.80675	1.2008
Pfkfb2	1.14659	5.6374	6.30624	1.14659	2.78578	1.19972
Slc5a3	0.254798	5.09595	5.82849	0.254798	2.78403	1.19972
Lysmd1	2.07023	6.62474	7.64393	2.07023	2.78377	1.19972
Uroc1	0.350347	1.21029	5.76479	0.350347	2.7633	1.18377
Rnf145	1.59248	5.92404	7.58023	1.59248	2.76037	1.18343
Ncam2	1.43324	6.78398	7.45283	1.43324	2.75497	1.18343
Sgms1	2.00653	5.79664	7.45283	2.00653	2.75483	1.18343
Supt3	1.62433	6.43364	7.38913	1.62433	2.7416	1.18343
Syne2	0.159248	0.636994	1.08289	0.159248	2.74053	1.18343
Ankrd6	1.17844	6.94323	7.64393	1.17844	2.74027	1.18343
Homer1	0.318497	1.21029	5.54185	0.318497	2.70606	1.15801
Wdr75	1.30584	5.70109	7.32543	1.30584	2.6892	1.14617
Trim35	0.764393	2.38873	4.23601	0.764393	2.67029	1.11984
4930546K05Rik	0.254798	5.1278	5.66924	0.254798	2.65626	1.10637
Dgcr2	0.796242	2.45243	8.15352	0.796242	2.63503	1.08541
Mrpl19	0.127399	0.636994	1.11474	0.127399	2.61035	1.0576
Usp26	0.286647	1.08289	5.79664	0.286647	2.6072	1.0576
Usp48	1.14659	5.66924	7.54838	1.14659	2.60363	1.0576
Pold4	1.08289	6.78398	7.58023	1.08289	2.60143	1.0576
Snrk	0.159248	0.668844	1.21029	0.159248	2.58645	1.05686
Mc1r	0.127399	0.605144	1.01919	0.127399	2.58058	1.05686
Gtf3c1	1.46509	5.47815	7.22988	1.46509	2.57415	1.05625
Gna11	0.127399	0.636994	1.14659	0.127399	2.54739	1.02631
B3glct	1.11474	6.52919	7.32543	1.11474	2.54266	1.02104
Col4a3	0.127399	0.605144	1.17844	0.127399	2.53769	1.01828
Sparc	0.573294	2.19763	3.56717	0.573294	2.53714	1.01828
Zc3hc1	0.732543	7.29358	8.02612	0.732543	2.52276	1.0087
Nol12	0.127399	0.254798	6.75213	0.127399	2.52116	1.0087
Tef	0.477745	1.97468	3.63086	0.477745	2.51151	1.0042
Map1a	0.127399	0.636994	1.11474	0.127399	2.51013	1.00331
Prkci	0.382196	5.51	6.81583	0.382196	2.4827	0.969643
Ppp4r1	1.27399	5.89219	7.19803	1.27399	2.449	0.928242
Kirrel2	0.254798	2.00653	3.12127	0.254798	2.44723	0.926526
Ptpn13	0.541445	7.38913	7.89872	0.541445	2.43134	0.908014
Cd59a	0.191098	1.08289	1.97468	0.191098	2.41606	0.89502
Cend1	0.445896	2.13393	3.50347	0.445896	2.39411	0.873035
Nagpa	0.668844	5.73294	7.77132	0.668844	2.39404	0.873035
Gareml	0.382196	2.13393	3.43977	0.382196	2.39262	0.87189
Zmiz2	0.222948	5.0004	6.21069	0.222948	2.38945	0.867365
Hip1	0.477745	5.79664	7.58023	0.477745	2.37824	0.854995
Chrdl1	0.414046	2.00653	3.28052	0.414046	2.37815	0.854995
Avl9	0.98734	5.60555	6.94323	0.98734	2.36661	0.849835
B4galt3	0.700693	6.01959	7.35728	0.700693	2.36635	0.849835
Mmp15	0.796242	6.30624	7.45283	0.796242	2.36591	0.849835
Tfap2a	0.0955491	0.605144	1.08289	0.0955491	2.36045	0.843863
Vezf1	0.477745	2.22948	7.67578	0.477745	2.35719	0.843602
2020-03-06	0.445896	2.26133	7.10248	0.445896	2.35571	0.842255
Ccdc78	0.191098	5.09595	5.66924	0.191098	2.35194	0.836733
Cyth1	0.191098	5.54185	6.62474	0.191098	2.33355	0.827934
Cask	0.0955491	0.636994	1.17844	0.0955491	2.32085	0.827934
Ide	0.159248	1.05104	2.80277	0.159248	2.32068	0.827934
Ank3	0.127399	0.859942	5.60555	0.127399	2.32012	0.827934
Rtp4	0.414046	5.2552	6.43364	0.414046	2.3193	0.827934
Etnppl	0.318497	2.07023	3.59902	0.318497	2.31873	0.827934
Cdkn2aip	0.0636994	0.541445	0.98734	0.0636994	2.31829	0.827934
Acot11	0.318497	1.94283	3.59902	0.318497	2.31767	0.827934
Smc6	0.605144	5.95589	7.19803	0.605144	2.30522	0.81644
Ppp1r9b	1.21029	6.11514	6.91138	1.21029	2.29963	0.813691
Spry2	0.0636994	0.605144	1.08289	0.0636994	2.29221	0.808968
Eef2	0.127399	1.11474	2.77092	0.127399	2.28939	0.808968
Dusp6	0.286647	2.10208	3.56717	0.286647	2.27802	0.797069
Pnkp	0.445896	5.76479	7.38913	0.445896	2.27801	0.797069
Pou4f1	0.127399	1.08289	2.00653	0.127399	2.27352	0.793319
Vcpip1	0.541445	5.5737	6.84768	0.541445	2.2733	0.793319
BC024978	0.159248	4.90485	5.47815	0.159248	2.26388	0.785905
Dnal1	0.445896	5.3826	6.14699	0.445896	2.26335	0.785905
Irak2	0.222948	4.23601	5.86034	0.222948	2.26217	0.785905
Rab3il1	0.0636994	0.159248	6.72028	0.0636994	2.26127	0.785905
Parn	0.509595	5.73294	7.16618	0.509595	2.25846	0.782826
Med22	0.318497	2.07023	7.80317	0.318497	2.25674	0.781277
Npm3-ps1	0.127399	5.03225	5.51	0.127399	2.25617	0.781277
Prkg2	0.0636994	5.03225	5.54185	0.0636994	2.2554	0.781099
Hoxb1	0.0636994	0.477745	5.54185	0.0636994	2.25281	0.778681
Lrrtm4	0.0955491	0.955491	1.91098	0.0955491	2.24464	0.766803
Rmnd5b	0.382196	7.10248	7.83502	0.382196	2.23861	0.76569
E330033B04Rik	0.0636994	0.541445	0.955491	0.0636994	2.23725	0.76569
Rbm45	0.0636994	0.541445	1.01919	0.0636994	2.23711	0.76569
Chmp7	0.350347	7.13433	7.86687	0.350347	2.23394	0.76569
Ctbp2	0.0636994	4.96855	5.54185	0.0636994	2.23214	0.76569
Uap1	0.350347	5.70109	7.10248	0.350347	2.2318	0.76569
Gucd1	0.668844	5.1915	6.46549	0.668844	2.22989	0.765144
Garem	0.191098	5.47815	6.91138	0.191098	2.22186	0.759243
Git1	0.605144	4.96855	6.78398	0.605144	2.21615	0.753479
Shc1	0	0.0636994	7.00693	0	2.20355	0.741006
Tcp11l2	0.286647	7.48468	8.02612	0.286647	2.20214	0.741006
Snrnp40	0.318497	7.13433	7.70763	0.318497	2.19725	0.737618
Hey1	0.127399	1.71988	3.40792	0.127399	2.19159	0.731494
Dpy19l3	0.222948	1.87913	2.96202	0.222948	2.18543	0.725566
Ppm1h	0.0318497	0.509595	5.51	0.0318497	2.18399	0.725165
Zfp444	0.0318497	0.541445	1.01919	0.0318497	2.18221	0.724213
Phf5a	0.0318497	6.24254	7.22988	0.0318497	2.18004	0.724213
Acot7	0.382196	5.54185	7.45283	0.382196	2.17724	0.722784
Armcx2	0.350347	5.41445	6.97508	0.350347	2.17569	0.722135
Fxr1	0.350347	6.59289	7.38913	0.350347	2.16965	0.714788
Smc1a	0.254798	6.30624	7.70763	0.254798	2.16904	0.714788
Lrtm1	0.0318497	0.509595	0.955491	0.0318497	2.16352	0.709115
Tgfbr1	0.382196	5.09595	7.29358	0.382196	2.16196	0.708288
Eea1	0.318497	6.94323	7.58023	0.318497	2.15978	0.707451
Dnajb1	0.159248	1.75173	7.58023	0.159248	2.15569	0.703911
Parva	0.286647	5.54185	7.38913	0.286647	2.15485	0.703911
Gm10745	0.0318497	0.477745	5.35075	0.0318497	2.15394	0.703518
Fam69c	0.159248	1.71988	3.18497	0.159248	2.14746	0.699398
Naa10	0.382196	6.65659	7.42098	0.382196	2.14715	0.699398
Fam107a	0.0636994	0.828092	1.62433	0.0636994	2.14226	0.696644
Acad8	0.191098	5.82849	7.67578	0.191098	2.14045	0.695791
Seh1l	0.509595	5.09595	7.00693	0.509595	2.14018	0.695791
Aff4	0.222948	6.17884	7.26173	0.222948	2.14007	0.695791
Map1b	0.0318497	5.09595	5.60555	0.0318497	2.13233	0.688823
Picalm	0.0318497	0.541445	5.0641	0.0318497	2.13126	0.688823
Ppp1r15b	0.222948	7.19803	7.73947	0.222948	2.12511	0.682018
Slc25a19	0.318497	5.82849	7.00693	0.318497	2.12431	0.682018
Dnttip2	0.286647	5.76479	7.10248	0.286647	2.11799	0.675452
Eif2b5	0.191098	5.76479	7.26173	0.191098	2.11347	0.675452
Unc5c	0.0636994	0.98734	2.22948	0.0636994	2.1131	0.675452
Atg7	0.0318497	0.573294	1.11474	0.0318497	2.11184	0.675452
Tmprss13	0.0318497	0.541445	1.01919	0.0318497	2.10746	0.67023
Deptor	0.0318497	0.509595	5.41445	0.0318497	2.10155	0.660896
Trim11	0.191098	5.92404	7.29358	0.191098	2.09886	0.658409
Usp18	0	0.159248	5.60555	0	2.0986	0.658409
Ercc2	0.0955491	5.4463	6.78398	0.0955491	2.08649	0.642117
Fgf16	0.0318497	0.891791	5.22335	0.0318497	2.08588	0.642117
Synj2bp	0	0.509595	0.923641	0	2.08364	0.64
Snx11	0.0636994	5.2552	6.62474	0.0636994	2.08112	0.636151
BC029722	0.159248	6.33809	7.38913	0.159248	2.0788	0.633756
Nipal1	0	0.509595	0.955491	0	2.07409	0.629669
Zfp120	0	0.477745	5.4463	0	2.05993	0.6171
Peg13	0.191098	5.86034	7.00693	0.191098	2.05812	0.615694
Smad2	0.191098	5.0641	6.46549	0.191098	2.05755	0.615694
Acads	0.0955491	7.07063	7.70763	0.0955491	2.05705	0.615694
Gm12942	0	0.127399	7.26173	0	2.05297	0.6123
Wrb	0	0.605144	1.14659	0	2.04674	0.6123
tdTomato	0	0.541445	1.01919	0	2.04468	0.61139
Taf12	0.127399	6.11514	7.42098	0.127399	2.04017	0.607596
Erlin1	0.127399	5.70109	7.07063	0.127399	2.03954	0.607536
Gss	0	0.0955491	6.81583	0	2.03716	0.605919
Cant1	0.0636994	1.84728	7.70763	0.0636994	2.03338	0.601583
Phf21a	0.0955491	2.16578	7.07063	0.0955491	2.03266	0.60119
Sap30	0.127399	6.52919	7.32543	0.127399	2.02943	0.595837
Bend4	0.0318497	0.98734	2.29318	0.0318497	2.02825	0.595582
Wash1	0.254798	3.85381	6.52919	0.254798	2.02661	0.593366
C5ar2	0	0.796242	1.71988	0	2.02007	0.58558
Brinp3	0.0636994	2.16578	7.93057	0.0636994	2.01564	0.580206
Rspry1	0.0955491	5.60555	6.91138	0.0955491	2.00872	0.571963
Rab7	0	0.828092	1.59248	0	2.00546	0.571963
Sugct	0.0318497	6.75213	7.54838	0.0318497	1.99047	0.55453
Tmem87a	0	0.509595	0.955491	0	1.98483	0.547794
Mum1	0	5.6374	6.68844	0	1.97691	0.541023
Dera	0	2.16578	7.77132	0	1.97476	0.541023
Cplx2	0	4.96855	5.51	0	1.97201	0.537296
Arhgef10l	0	2.00653	7.32543	0	1.96907	0.534457
Fbl	-0.0318497	5.70109	7.22988	0	1.95347	0.518212
Nr1h3	-0.0318497	0.191098	6.46549	0	1.94799	0.512206
Serp1	-0.0318497	1.46509	2.64352	0	1.94753	0.512206
Pi4kb	-0.0318497	0.477745	4.873	0	1.93796	0.502994
Gtf2e1	-0.0318497	0.0955491	6.59289	0	1.9322	0.497582
Eif4g1	-0.0318497	0.955491	2.35688	0	1.93067	0.496801
Znhit3	-0.0636994	6.21069	7.35728	0	1.92828	0.493904
Ddx50	-0.0636994	1.94283	6.94323	0	1.92274	0.488174
Dr1	-0.0955491	5.09595	7.03878	0	1.91697	0.48563
4930519F09Rik	-0.0955491	1.71988	4.07676	0	1.91028	0.481015
Alpk3	-0.0318497	0.764393	5.1915	0	1.91024	0.481015
Lonrf3	-0.0636994	1.84728	3.66271	0	1.90981	0.481015
Ncoa3	-0.0318497	0.477745	0.955491	0	1.90314	0.476055
Get4	-0.0636994	1.81543	3.18497	0	1.90275	0.476055
Gja5	-0.0318497	0.891791	1.97468	0	1.89909	0.47575
Fndc5	-0.0318497	0.477745	0.923641	0	1.89753	0.474822
Hgsnat	-0.0955491	1.87913	3.02572	0	1.89255	0.469565
Tpm4	-0.0955491	0.254798	6.27439	0	1.88896	0.467781
Phyhd1	-0.127399	7.03878	7.67578	0	1.88676	0.464243
Timm50	-0.0955491	2.13393	3.31237	0	1.88525	0.462108
Tmem170b	-0.0318497	0.573294	1.14659	0	1.88196	0.458201
Src	-0.127399	1.78358	7.48468	0	1.87797	0.45754
Adgrl1	-0.0955491	1.21029	2.93017	0	1.8667	0.448869
Suv420h2	-0.222948	5.92404	6.91138	0	1.86598	0.448869
Pmepa1	-0.254798	5.15965	6.56104	0	1.86103	0.441525
Cluh	-0.127399	1.84728	3.50347	0	1.85765	0.438491
Smim3	-0.127399	1.81543	3.24867	0	1.85158	0.429039
Abhd8	-0.127399	1.87913	3.21682	0	1.84963	0.428617
Pdp2	-0.0318497	0.477745	0.98734	0	1.84934	0.428617
Dcun1d1	-0.159248	6.14699	7.54838	0	1.84755	0.42677
Micu3	-0.0636994	0.573294	3.91751	0	1.84457	0.423259
Socs5	-0.191098	5.73294	7.61208	0	1.83364	0.406344
Abat	-0.0636994	0.828092	2.10208	0	1.83093	0.40334
Mtmr4	-0.0636994	0.0636994	6.78398	0	1.82885	0.401934
1700042G15Rik	-0.0636994	0.668844	5.3189	0	1.82652	0.400114
Celf2	-0.0955491	0.955491	1.87913	0	1.82651	0.400114
Alg11	-0.0318497	0.445896	0.891791	0	1.82616	0.400114
Synj1	-0.191098	6.05144	7.42098	0	1.82576	0.400114
Susd6	-0.191098	6.08329	7.22988	0	1.8093	0.37867
Coq6	-0.350347	5.86034	7.19803	0	1.80526	0.375851
N6amt2	-0.286647	6.72028	7.38913	0	1.8045	0.375851
Slmo1	-0.159248	1.46509	2.89832	0	1.80397	0.375851
Sft2d2	-0.191098	1.78358	3.28052	0	1.80314	0.375851
Cers1	-0.0955491	0.923641	2.29318	0	1.78533	0.356653
Ppcdc	-0.286647	6.97508	7.54838	0	1.78275	0.353946
Zbtb11	-0.191098	1.27399	6.01959	0	1.78117	0.352588
Rfwd3	-0.254798	5.60555	7.26173	0	1.78068	0.352588
Lin7c	-0.222948	1.75173	3.31237	0	1.77997	0.352588
Rbm34	-0.286647	4.6819	5.60555	0	1.77952	0.352588
Alad	-0.286647	6.68844	7.38913	0	1.77859	0.352588
Kdm5b	-0.191098	1.40139	3.15312	0	1.77836	0.352588
Got1	-0.254798	5.76479	7.70763	0	1.77639	0.351373
Pign	-0.573294	4.84115	6.36994	0	1.76869	0.341905
Dpf2	-0.222948	1.71988	2.93017	0	1.76684	0.341905
Cdh19	-0.254798	1.75173	3.24867	0	1.76626	0.341905
Cnnm4	-0.0955491	4.84115	5.4463	0	1.76381	0.341814
Naa50	-0.318497	6.24254	7.13433	0	1.76249	0.341741
Tap2	-0.286647	7.38913	7.89872	0	1.75251	0.334386
Strn4	-0.668844	0.222948	6.62474	0	1.75215	0.334386
Arhgap12	-0.286647	1.94283	3.43977	0	1.75201	0.334386
Gm20751	-0.414046	0.445896	5.51	0	1.75107	0.333466
Ankra2	-0.318497	5.82849	7.22988	0	1.74828	0.330481
Thbs3	-0.541445	4.58636	6.30624	0	1.74563	0.329577
Ccz1	-0.350347	6.11514	7.22988	0	1.74417	0.328518
Dusp11	-0.222948	1.46509	2.89832	0	1.74368	0.328357
Zmat2	-0.0636994	0.445896	0.955491	0	1.73642	0.319955
Gdf1	-0.0955491	0.668844	1.56063	0	1.73548	0.319702
Thtpa	-0.0318497	0.0955491	5.86034	0	1.72815	0.314392
Colgalt1	-0.445896	5.28705	7.10248	0	1.72544	0.314392
Tsix	-0.0636994	0.254798	0.859942	0	1.72355	0.314392
Rorb	-0.0955491	0.541445	1.14659	0	1.7212	0.314392
Galnt18	-0.286647	1.68803	7.35728	0	1.72033	0.313623
Fahd1	-0.286647	1.56063	3.02572	0	1.72003	0.313623
Rbm42	-0.159248	1.43324	2.73907	0	1.71589	0.308302
Txnl4b	-0.0636994	0.445896	0.923641	0	1.71493	0.308302
Vps4b	-0.318497	1.52879	7.26173	0	1.71471	0.308302
Hjurp	-0.0955491	4.873	5.35075	0	1.71391	0.30809
C330006A16Rik	-0.0636994	0.414046	0.859942	0	1.70573	0.300536
Dst	-0.0955491	0.509595	1.08289	0	1.70507	0.300536
Tmem243	-0.0636994	0.414046	0.859942	0	1.70374	0.299388
Adck1	-0.350347	2.07023	7.83502	0	1.69684	0.29637
Nktr	-0.636994	4.77745	6.49734	0	1.69669	0.29637
Dlg1	-0.382196	1.84728	5.54185	0	1.69507	0.29637
Rnmt	-0.859942	5.47815	6.62474	0	1.6948	0.29637
Zfp263	-0.382196	5.15965	7.19803	0	1.6947	0.29637
Cdc123	-0.222948	1.14659	2.67537	0	1.69362	0.296272
Hgs	-0.318497	1.68803	7.48468	0	1.69224	0.294334
Timm10b	-0.254798	1.40139	3.21682	0	1.68416	0.284162
Dnajc1	-0.445896	5.73294	6.87953	0	1.67328	0.274525
Actn4	-0.382196	1.71988	2.83462	0	1.67235	0.274183
Nmd3	-0.382196	6.01959	7.22988	0	1.67028	0.272452
Zfand2a	-0.0955491	0.159248	6.36994	0	1.66691	0.270578
Abcb7	-0.668844	4.61821	5.54185	0	1.66573	0.270578
Abhd17b	-0.445896	6.27439	7.35728	0	1.66447	0.270578
Prickle2	-0.891791	1.49694	2.51613	0	1.66375	0.270578
Sox5	-0.382196	1.84728	7.32543	0	1.65989	0.270578
Mrps34	-0.254798	1.14659	2.51613	0	1.65718	0.270578
Dus2	-0.445896	5.22335	6.97508	0	1.65677	0.270578
Acadsb	-0.222948	0.955491	2.22948	0	1.65569	0.270578
Pja2	-0.286647	1.17844	3.24867	0	1.65492	0.270578
Flna	-0.414046	5.47815	6.84768	0	1.65458	0.270578
Atp6v1e1	-0.159248	0.732543	1.81543	0	1.65355	0.270578
Pycrl	-0.350347	1.68803	3.02572	0	1.65331	0.270578
Mbtps1	-0.509595	5.5737	6.68844	0	1.65282	0.270578
St6gal1	-0.477745	6.52919	7.51653	0	1.65096	0.269012
Inpp4a	-0.0955491	0.414046	0.891791	0	1.64947	0.26857
Trappc1	-0.191098	0.923641	2.54798	0	1.64888	0.26857
Vwa5a	-0.414046	7.32543	7.73947	0	1.64811	0.267725
Ldlrad3	-0.350347	1.46509	7.22988	0	1.64601	0.264854
Gfod1	-0.0955491	0.350347	1.56063	0	1.64448	0.263058
Btrc	-0.350347	1.33769	7.45283	0	1.64363	0.262951
Nacc2	-0.0955491	0.445896	0.955491	0	1.63724	0.258807
Peg12	-0.222948	4.7456	5.2552	0	1.63082	0.253557
E430025E21Rik	-0.477745	5.4463	7.03878	0	1.62815	0.252442
Ak6	-0.700693	5.76479	6.84768	0	1.62799	0.252442
Mapre2	-0.254798	1.05104	2.57982	0	1.62337	0.247278
Pja1	-0.382196	1.40139	7.64393	0	1.62133	0.244493
Cpsf1	-0.509595	5.73294	7.35728	0	1.62012	0.24398
Usp9x	-0.509595	1.75173	3.37607	0	1.61675	0.241696
Josd2	-0.477745	1.56063	7.45283	0	1.61202	0.237788
Nudt7	-0.414046	1.56063	3.28052	0	1.61044	0.236142
Pid1	-0.382196	1.43324	2.77092	0	1.60879	0.236142
Ccm2	-0.477745	5.51	7.16618	0	1.60831	0.236142
Etohd2	-1.27399	0.159248	5.98774	0	1.6071	0.236142
Spsb3	-0.382196	1.81543	3.24867	0	1.60581	0.236142
Aldh6a1	-0.127399	0.541445	1.17844	0	1.60342	0.236142
Zfp26	-0.159248	4.7456	5.3189	0	1.60026	0.236142
2610100L16Rik	-0.732543	5.89219	6.75213	0	1.59915	0.235731
Srp19	-0.477745	1.62433	3.15312	0	1.5987	0.235731
Arrdc3	-0.318497	1.01919	2.48428	0	1.59348	0.231759
Psmd3	-0.382196	1.52879	3.02572	0	1.59008	0.22827
Sntb1	-0.636994	6.05144	7.03878	0	1.58948	0.227746
Dffa	-0.318497	0.254798	6.11514	0	1.58318	0.220315
Arid3a	-0.0955491	0.254798	1.17844	0	1.58237	0.220093
Ints10	-0.445896	1.71988	3.21682	0	1.57852	0.21868
Sh3pxd2b	-1.11474	5.3189	6.52919	0	1.57615	0.217243
G6pdx	-0.445896	2.07023	3.15312	0	1.55888	0.199401
Gpx7	-0.509595	1.68803	7.61208	0	1.55877	0.199401
Epm2aip1	-0.636994	5.92404	7.10248	0	1.55824	0.199401
Ubr7	-0.445896	1.78358	7.35728	0	1.55735	0.199401
Cdc26	-0.541445	1.68803	3.34422	0	1.55713	0.199401
G530011O06Rik	-0.541445	1.21029	3.94936	0	1.55708	0.199401
Gfra1	-0.254798	1.11474	2.67537	0	1.55665	0.199213
Dlat	-0.445896	1.59248	3.24867	0	1.55093	0.190305
Rcn1	-0.541445	5.0641	6.59289	0	1.54954	0.189727
Arrb1	-0.477745	1.17844	3.18497	0	1.54857	0.189727
Btg1	-0.127399	0.477745	1.05104	0	1.54486	0.18693
Tsku	-0.127399	0.414046	0.891791	0	1.54307	0.186566
Shisa9	-0.222948	0.764393	1.78358	0	1.54075	0.186447
Strbp	-0.127399	0.382196	4.65005	0	1.53966	0.186447
Os9	-0.191098	0.636994	2.13393	0	1.53885	0.186447
Hspa8	-0.127399	0.382196	0.859942	0	1.53848	0.186447
Ahdc1	-0.127399	0.382196	0.828092	0	1.53408	0.18367
Glul	-0.127399	0.382196	0.859942	0	1.53366	0.18367
Gcnt4	-0.509595	1.78358	3.40792	0	1.53343	0.18367
Eno1b	-0.159248	0.509595	1.08289	0	1.53221	0.181755
Mief2	-0.127399	0.350347	5.2552	0	1.52727	0.178764
Lbp	-0.0636994	0.159248	0.732543	0	1.527	0.178764
Fli1	-0.222948	0.764393	1.78358	0	1.52649	0.178764
Fam81a	-0.0955491	0.191098	5.89219	0	1.52646	0.178764
Kdm6b	-0.127399	0.414046	0.891791	0	1.52543	0.178764
Morf4l1	-0.159248	0.477745	1.05104	0	1.52354	0.176835
Carhsp1	-0.414046	1.40139	2.73907	0	1.52291	0.176835
Tirap	-0.445896	4.45896	5.1915	0	1.52096	0.176835
Cdc37	-0.382196	1.17844	2.80277	0	1.51996	0.175525
Ccdc153	-0.159248	0.318497	3.85381	0	1.51665	0.173047
Apbb2	-1.59248	0.127399	6.59289	0	1.5163	0.173047
Mtfmt	-0.605144	4.33156	5.22335	0	1.51548	0.173047
Kmt2a	-0.828092	1.84728	4.04491	0	1.50816	0.167193
Ogt	-0.191098	0.636994	1.46509	0	1.50546	0.165789
2900097C17Rik	-0.605144	1.56063	2.83462	0	1.50464	0.165789
Stat3	-0.541445	1.78358	3.40792	0	1.50302	0.164579
Cdadc1	-0.573294	1.59248	7.03878	0	1.5022	0.16432
Dbp	-0.191098	0.541445	1.24214	0	1.50114	0.16432
Smox	-0.222948	0.668844	1.87913	0	1.50075	0.16432
Tmem121	-0.0636994	0.0636994	5.73294	0	1.49993	0.16423
1700029J07Rik	-0.191098	0.127399	6.27439	0	1.49769	0.16259
Ubl7	-0.477745	1.65618	2.96202	0	1.48607	0.154592
Rangrf	-0.636994	1.62433	3.05757	0	1.48472	0.154592
Exoc2	-0.477745	1.05104	7.26173	0	1.48293	0.154592
Polr2d	-0.477745	1.30584	3.08942	0	1.48242	0.154329
Klhdc3	-0.605144	1.75173	6.97508	0	1.4783	0.150979
Adrbk2	-0.222948	0.636994	1.36954	0	1.47722	0.150364
Mapk12	-0.0636994	0.0955491	5.60555	0	1.47565	0.148703
2510002D24Rik	-0.350347	0.318497	5.60555	0	1.47042	0.143605
Acta2	-0.222948	0.891791	2.42058	0	1.46872	0.142005
Pkm	-0.159248	0.477745	1.01919	0	1.46726	0.141051
Rreb1	-0.254798	0.159248	5.82849	0	1.46701	0.141051
Colq	-1.14659	4.20416	5.89219	0	1.46634	0.140347
Unc13c	-0.318497	0.891791	2.00653	0	1.46591	0.140347
Ifitm3	-0.668844	5.70109	6.59289	0	1.46376	0.138325
Ano6	-0.127399	0.350347	0.828092	0	1.46184	0.138325
Eif2ak2	-0.668844	3.98121	4.873	0	1.4615	0.138325
Pdzd8	-0.127399	0.382196	0.859942	0	1.46068	0.138325
Ric8	-4.58636	0.0955491	7.19803	0	1.45897	0.137594
Tubb2a	-0.222948	0.573294	1.52879	0	1.45828	0.137594
Cdpf1	-0.796242	5.03225	6.84768	0	1.4582	0.137594
Rpp14	-0.605144	1.17844	7.38913	0	1.45697	0.135683
Igtp	-0.477745	1.94283	3.56717	0	1.4534	0.131364
Mcrs1	-0.541445	1.43324	2.99387	0	1.45263	0.131068
Nup50	-0.541445	1.49694	6.78398	0	1.45111	0.129133
G3bp2	-0.828092	1.46509	7.07063	0	1.44899	0.128796
Colec12	-0.636994	4.01306	4.9367	0	1.44877	0.128796
E130308A19Rik	-0.127399	0.0636994	6.27439	0	1.44832	0.128658
Ttc32	-1.24214	4.65005	6.75213	0	1.44493	0.127857
Rnf14	-0.573294	1.75173	2.93017	0	1.44427	0.127118
Igf2bp2	-0.127399	0.350347	0.828092	0	1.4428	0.126074
Hyls1	-0.222948	0.605144	1.56063	0	1.44104	0.126074
Nr1d2	-0.414046	1.08289	2.42058	0	1.44047	0.126074
Dda1	-0.573294	1.36954	2.89832	0	1.43797	0.125301
Tmem184b	-1.01919	5.95589	7.61208	0	1.43589	0.125301
Rgs20	-0.191098	0.541445	1.27399	0	1.43587	0.125301
Cdc42ep4	-0.318497	0.764393	1.84728	0	1.4349	0.124173
Sec61a1	-0.382196	0.828092	1.94283	0	1.4313	0.122073
Cables2	-0.0636994	0.0636994	5.82849	0	1.43074	0.122073
Setdb1	-2.42058	0.159248	6.43364	0	1.42963	0.122073
Ubqln1	-0.541445	1.36954	2.70722	0	1.42893	0.122073
Zfp870	-0.700693	4.58636	5.51	0	1.42645	0.119909
St6galnac5	-0.605144	5.15965	7.26173	0	1.42621	0.119909
Eva1a	-0.191098	0.477745	1.11474	0	1.4253	0.118605
Lyrm4	-0.222948	0.541445	1.30584	0	1.42235	0.11576
Dkk3	-0.222948	0.509595	1.11474	0	1.42215	0.11576
Rab28	-0.700693	1.68803	3.34422	0	1.41688	0.110618
Atp5a1	-0.191098	0.477745	1.11474	0	1.4139	0.108812
Ctage5	-0.636994	1.30584	2.86647	0	1.41378	0.108812
Patz1	-0.605144	1.24214	7.42098	0	1.41229	0.106672
Basp1	-0.0955491	0.191098	0.796242	0	1.41188	0.106672
Phip	-0.668844	1.46509	3.37607	0	1.40972	0.104276
5930403L14Rik	-0.541445	1.11474	3.66271	0	1.40957	0.104276
Ptpn9	-0.605144	1.46509	2.93017	0	1.40435	0.0974576
Adhfe1	-0.222948	0.541445	1.36954	0	1.40294	0.0974576
Itch	-0.891791	1.68803	6.52919	0	1.40282	0.0974576
Arl2bp	-0.541445	1.21029	2.89832	0	1.40021	0.0951829
App	-0.636994	5.5737	6.75213	0	1.3981	0.0937521
Trmu	-1.65618	0.159248	5.89219	0	1.39672	0.0923604
Pou3f2	-0.191098	0.414046	0.98734	0	1.39341	0.0907918
Mrpl15	-0.477745	1.01919	2.48428	0	1.39248	0.0907918
Pwwp2a	-1.14659	4.20416	4.90485	0	1.39092	0.0892176
Cdv3	-0.159248	0.350347	0.828092	0	1.39046	0.0892176
Hdac8	-0.828092	5.89219	6.84768	0	1.39032	0.0892176
Hes5	-0.286647	0.636994	1.49694	0	1.39006	0.0892176
P3h1	-0.382196	0.0636994	6.81583	0	1.38884	0.08804
Psd2	-0.509595	1.05104	2.26133	0	1.38862	0.08804
Senp7	-0.668844	4.14046	4.90485	0	1.38737	0.0878807
Tdrd7	-0.509595	0.0318497	7.58023	0	1.38638	0.0870277
Taf9b	-0.668844	1.56063	2.83462	0	1.38594	0.0867226
Cul5	-0.477745	1.01919	3.34422	0	1.38493	0.0851674
Dusp8	-0.0955491	0.191098	0.732543	0	1.38424	0.0843102
Slc12a4	-0.573294	1.40139	2.80277	0	1.38237	0.0820071
Entpd7	-0.254798	0.254798	3.15312	0	1.38161	0.0820071
Lrrc57	-0.636994	1.11474	2.99387	0	1.38026	0.0820071
Prex2	-0.222948	0.477745	1.14659	0	1.37985	0.0820071
Ifitm2	-1.46509	0.127399	6.05144	0	1.37971	0.0820071
Tspan5	-0.732543	1.62433	3.56717	0	1.37912	0.0820071
Prmt1	-1.33769	3.79011	6.68844	0	1.37852	0.0820071
Stard7	-0.700693	1.68803	2.99387	0	1.37804	0.0820071
Prkag1	-0.636994	1.59248	2.93017	0	1.37793	0.0820071
Atp13a2	-0.98734	6.14699	6.94323	0	1.37775	0.0820071
Thap7	-0.796242	1.27399	7.38913	0	1.37588	0.0820071
Csnk2b	-0.350347	0.732543	2.35688	0	1.37301	0.0820071
Fuz	-0.796242	1.62433	3.18497	0	1.37287	0.0820071
AI450353	-0.191098	0.350347	5.0641	0	1.37226	0.081838
Mical3	-2.67537	0.286647	5.98774	0	1.37018	0.0786263
Aplp1	-0.191098	0.414046	0.98734	0	1.36813	0.0772291
Tpm1	-0.955491	5.0004	6.62474	0	1.36797	0.0772291
Slfn5	-0.159248	0.350347	0.796242	0	1.36779	0.0772291
Zc3h11a	-0.636994	1.36954	3.05757	0	1.36661	0.0766288
Foxc1	-0.286647	0.668844	1.87913	0	1.36592	0.0766288
Tbx3	-0.127399	0.254798	1.49694	0	1.36569	0.0766288
Gtf3a	-0.700693	1.01919	7.29358	0	1.36518	0.0766288
Pepd	-0.636994	1.84728	2.99387	0	1.36453	0.0766288
D630003M21Rik	-0.191098	0.318497	5.35075	0	1.36337	0.0753669
Xpo7	-0.445896	0.573294	4.9367	0	1.36307	0.0753669
Cep57	-1.05104	5.2552	6.78398	0	1.36114	0.0733629
Map7d1	-0.668844	1.43324	2.80277	0	1.36078	0.0733375
Rabgap1	-0.891791	1.71988	5.82849	0	1.35969	0.0728425
Gnai3	-0.636994	1.46509	2.73907	0	1.35819	0.0727736
2310036O22Rik	-0.700693	1.36954	2.83462	0	1.35805	0.0727736
Casz1	-0.127399	0.222948	0.891791	0	1.35794	0.0727736
Smyd4	-1.24214	4.71375	5.95589	0	1.35677	0.0727736
Clk3	-0.828092	1.49694	7.51653	0	1.3561	0.0727736
Spc24	-0.318497	4.6819	5.22335	0	1.3535	0.0727736
Cux1	-1.68803	0.573294	5.92404	0	1.35086	0.0711021
Znrf3	-0.159248	0.350347	0.859942	0	1.34862	0.0700442
Trim72	-0.254798	0.541445	1.46509	0	1.34859	0.0700442
Sh3gl1	-0.700693	1.56063	3.08942	0	1.34832	0.0700442
Snrnp200	-0.796242	5.86034	7.32543	0	1.3454	0.0683766
Zcchc3	-3.98121	5.79664	7.07063	0	1.34438	0.0680903
Ptprd	-0.191098	0.350347	4.9367	0	1.34434	0.0680903
Msl1	-0.382196	0.286647	5.1915	0	1.34405	0.0680749
Wdr48	-0.605144	1.21029	3.08942	0	1.33849	0.06324
Rnf44	-0.445896	0.828092	2.32503	0	1.33815	0.06324
Nfkbie	-0.318497	0.350347	2.00653	0	1.33629	0.0617067
Sgip1	-0.700693	1.27399	2.93017	0	1.33562	0.0610223
Fbxo7	-0.764393	1.87913	3.08942	0	1.33469	0.0610223
Tuba1b	-0.254798	0.573294	1.40139	0	1.334	0.0610223
Srsf4	-0.796242	1.68803	7.73947	0	1.3312	0.0588697
Rhbdf1	-0.732543	1.40139	3.05757	0	1.33104	0.0588697
Chmp1b	-0.732543	1.36954	3.12127	0	1.32989	0.0588697
Cndp2	-0.700693	1.49694	7.70763	0	1.3296	0.0588697
Fgf12	-0.159248	0.318497	4.7456	0	1.32952	0.0588697
Phkb	-0.636994	1.24214	3.05757	0	1.32923	0.0588697
Drg1	-0.414046	0.764393	2.45243	0	1.32915	0.0588697
Anapc10	-0.955491	1.62433	3.28052	0	1.32898	0.0588697
Ift80	-0.286647	0.0636994	6.33809	0	1.32878	0.0588697
Hexdc	-1.36954	3.53532	5.51	0	1.32831	0.0588697
Tns3	-1.81543	2.54798	6.27439	0	1.32645	0.0574353
Limch1	-0.541445	0.859942	3.47162	0	1.32511	0.0557533
Dut	-0.859942	5.22335	6.87953	0	1.32421	0.0556474
2010012O05Rik	-0.191098	0.350347	0.828092	0	1.32409	0.0556474
Lurap1	-1.75173	5.89219	6.78398	0	1.32367	0.0556474
Luc7l	-0.700693	1.40139	3.31237	0	1.32181	0.052855
Col19a1	-0.127399	0.222948	0.955491	0	1.32112	0.052551
1700021F05Rik	-0.796242	1.56063	3.53532	0	1.31883	0.0510252
E530011L22Rik	-0.222948	0.222948	5.22335	0	1.31852	0.0510252
Spire1	-0.859942	1.30584	3.21682	0	1.31839	0.0510252
Mmp28	-0.98734	0.127399	5.89219	0	1.31787	0.0510252
Cfap36	-0.573294	1.01919	2.54798	0	1.31625	0.0510252
Atp1a2	-0.127399	0.254798	0.636994	0	1.31506	0.0499892
Fkbp4	-0.350347	0.605144	2.00653	0	1.31027	0.0482662
Cdc42bpa	-0.764393	1.24214	7.00693	0	1.30766	0.043243
E2f5	-0.923641	6.27439	7.32543	0	1.30396	0.0395154
Trim23	-0.796242	1.62433	3.34422	0	1.30014	0.0388857
Serpinh1	-0.286647	0.541445	1.46509	0	1.29942	0.0388857
Slc20a2	-0.636994	1.71988	3.50347	0	1.29759	0.0375118
Ints9	-0.764393	5.3189	6.75213	0	1.29673	0.0364787
Gcdh	-0.859942	1.87913	3.12127	0	1.29498	0.0359846
Hps5	-4.84115	0.127399	6.14699	0	1.29261	0.0354193
Dusp18	-0.828092	5.51	6.91138	0	1.29217	0.0354193
Sardh	-0.923641	5.41445	6.81583	0	1.29176	0.0354193
Fgf1	-0.605144	0.891791	2.07023	0	1.29172	0.0354193
Adprm	-4.39526	0.159248	6.11514	0	1.28891	0.0340587
Scn2b	-0.350347	4.90485	5.3189	0	1.28822	0.0336673
Degs1	-0.222948	0.414046	0.955491	0	1.28765	0.0330958
Tcf4	-0.222948	0.414046	1.01919	0	1.28539	0.0311662
Pdrg1	-0.573294	0.923641	2.45243	0	1.28507	0.0311662
Cox15	-4.07676	0.0636994	6.75213	0	1.28432	0.0311662
Tmem234	-0.350347	0.605144	1.33769	0	1.27922	0.0266404
Rbm15	-2.13393	0.891791	4.23601	0	1.27887	0.0266404
Arsb	-0.700693	1.17844	2.67537	0	1.27808	0.0266404
Atp1b1	-0.191098	0.350347	0.923641	0	1.27768	0.0266404
Cdc42se1	-0.700693	1.62433	2.89832	0	1.27717	0.0265792
Sox21	-0.828092	1.30584	3.12127	0	1.27695	0.0265792
Sbno1	-0.923641	1.40139	5.2552	0	1.27627	0.0265792
Ermp1	-0.955491	1.62433	5.1278	0	1.27304	0.022518
Eif2s3x	-2.16578	5.79664	6.78398	0	1.27304	0.022518
Il17re	-0.350347	0.636994	1.91098	0	1.27269	0.0223522
Adgre5	-0.859942	1.56063	2.77092	0	1.27243	0.0223522
Pdcd2l	-0.859942	1.08289	7.26173	0	1.27	0.018525
Vps35	-0.445896	0.668844	1.87913	0	1.26932	0.018525
Shisa2	-0.859942	1.71988	3.18497	0	1.26758	0.0170912
Kdelr2	-0.222948	0.382196	0.98734	0	1.26612	0.0168435
Gsk3b	-0.191098	0.350347	0.891791	0	1.26532	0.0168435
Rprd1a	-0.891791	1.08289	6.84768	0	1.26455	0.0168435
B9d2	-1.05104	1.40139	7.26173	0	1.26373	0.0165551
Nap1l4	-0.541445	1.52879	2.73907	0	1.26298	0.0165551
Tead1	-0.382196	4.873	6.17884	0	1.2628	0.0165551
Nt5c2	-0.509595	0.891791	2.48428	0	1.26242	0.0162985
Gfpt1	-2.67537	5.3189	6.33809	0	1.25948	0.0152088
Otud5	-1.24214	5.47815	6.65659	0	1.25912	0.0152088
Mfap3l	-0.636994	1.27399	2.45243	0	1.25854	0.0152088
2020-03-07	-1.17844	6.21069	6.87953	0	1.2582	0.0152088
D17H6S53E	-0.191098	0.318497	0.764393	0	1.25694	0.0130643
Ncoa1	-0.382196	0.605144	1.71988	0	1.2564	0.012471
Herc1	-1.11474	1.46509	6.68844	0	1.25603	0.0122512
Gps2	-2.93017	5.51	6.49734	0	1.25425	0.0095515
2610301B20Rik	-0.668844	1.17844	2.80277	0	1.25276	0.00804219
Zfp266	-0.191098	0.318497	0.764393	0	1.25176	0.00645033
Fam134b	-0.796242	1.21029	3.15312	0	1.25076	0.00545477
Rasgrp1	-0.955491	1.14659	6.01959	0	1.25048	0.00545477
Clcn3	-0.445896	0.732543	1.94283	0	1.25024	0.00545477
Dennd1a	-0.796242	1.21029	2.61167	0	1.24902	0.00450145
Notch1	-0.350347	0.605144	1.49694	0	1.249	0.00450145
Sec16a	-0.127399	0.127399	5.1278	0	1.24657	0.00105209
Cacng8	-2.96202	0.350347	4.26786	0	1.24583	0.00105209
Rnf41	-0.828092	5.66924	7.32543	0	1.24492	0.000492924
Acbd4	-4.33156	0.191098	6.78398	0	1.24334	0.000492924
Prr3	-1.17844	5.1915	6.40179	0	1.24305	0.000492924
Nkap	-4.10861	0.0636994	6.46549	0	1.24251	0.000139714
Hibch	-0.859942	1.49694	3.05757	0	1.24097	0
A430005L14Rik	-1.01919	0.0636994	6.75213	0	1.24063	0
Ecd	-0.350347	0.414046	5.2552	0	1.23989	0
Ripk1	-1.62433	5.15965	6.33809	0	1.23901	0
Slmap	-0.859942	1.75173	3.21682	0	1.23756	0
Paqr7	-0.286647	0.477745	1.17844	0	1.23645	0
Elp3	-4.7456	0.0955491	6.81583	0	1.23281	0
Ppp1r35	-1.01919	1.30584	2.89832	0	1.22686	0
Myo6	-0.350347	0.541445	1.30584	0	1.22638	0
Polr2m	-0.859942	1.56063	3.15312	0	1.22631	0
Tyms	-2.22948	3.88566	4.7456	0	1.22488	0
Ppp1r7	-0.573294	0.828092	2.77092	0	1.22466	0
Ado	-0.191098	0.318497	0.764393	0	1.2236	0
Zfp346	-0.222948	0	6.49734	0	1.22291	0
Ikzf5	-1.65618	1.30584	6.14699	0	1.22151	0
Iqcb1	-2.22948	3.37607	6.21069	0	1.22044	0
Tmem126b	-0.955491	1.59248	3.21682	0	1.21927	0
Trib1	-0.0636994	0	6.56104	0	1.2161	0
Mier3	-1.11474	1.30584	6.68844	0	1.2155	0
Drap1	-1.05104	1.05104	2.73907	0	1.21543	0
Sf3b2	-0.732543	1.24214	2.73907	0	1.21416	0
Zfyve16	-3.79011	0.0636994	5.86034	0	1.21189	0
Glrx5	-0.98734	1.24214	7.16618	0	1.21181	0
Tollip	-0.668844	0.732543	2.32503	0	1.20976	0
Cog3	-3.43977	0	5.82849	0	1.20963	0
Zbtb21	-0.222948	0.350347	1.01919	0	1.20869	0
Copz1	-0.382196	0.541445	1.78358	0	1.20733	0
Bdnf	-0.191098	0.286647	5.0641	0	1.20585	0
Park2	-3.15312	0.254798	6.24254	0	1.2017	0
Rab6a	-0.414046	0.573294	1.49694	0	1.2014	0
Exosc10	-0.828092	1.49694	3.02572	0	1.20082	0
Trafd1	-0.222948	0	6.43364	0	1.20011	0
Pdcd4	-0.191098	0.318497	0.764393	0	1.19968	0
Cyth2	-0.859942	1.36954	3.02572	0	1.19757	0
Zcchc17	-0.828092	1.40139	3.08942	0	1.19702	0
D3Ertd751e	-4.20416	0.286647	6.72028	0	1.19251	0
Hsd17b10	-0.445896	0.541445	2.16578	0	1.19228	0
Jup	-0.668844	1.01919	2.42058	0	1.19199	0
Slc35c2	-4.873	0.0955491	7.96242	0	1.19023	0
Nuak2	-0.286647	4.7456	5.28705	0	1.18798	0
Fbxo38	-1.01919	1.01919	7.10248	0	1.18737	0
Prop1	-0.159248	0.191098	0.732543	0	1.18674	0
Cln5	-0.796242	1.14659	2.86647	0	1.18611	0
Babam1	-0.955491	0.796242	7.16618	0	1.18506	0
Arhgap35	-0.509595	0.350347	5.15965	0	1.18033	0
Rhoq	-3.94936	0.159248	6.36994	0	1.18019	0
Celf1	-1.24214	1.56063	4.52266	0	1.17941	0
Rbbp4	-0.414046	0.573294	1.40139	0	1.1789	0
Anapc4	-0.859942	1.40139	3.12127	0	1.17844	0
Cep295	-2.96202	0	5.47815	0	1.17826	0
Cxxc5	-0.98734	1.43324	3.15312	0	1.17614	0
Pvrl1	-1.36954	1.49694	5.70109	0	1.17611	0
1700019D03Rik	-4.33156	0.0955491	6.21069	0	1.17572	0
Hist1h2be	-2.48428	5.41445	6.17884	0	1.17524	0
Ube2g1	-0.955491	1.46509	2.96202	0	1.17198	0
Bcat2	-1.01919	1.43324	7.32543	0	1.17181	0
Sdc4	-0.254798	0.350347	0.859942	0	1.17112	0
Brd7	-1.21029	1.36954	7.03878	0	1.17084	0
Zcchc24	-0.828092	1.05104	2.61167	0	1.17028	0
Arfgap1	-3.98121	0.0318497	7.35728	0	1.16893	0
Kctd17	-0.477745	0.0318497	6.30624	0	1.16802	0
Prodh	-0.286647	0.382196	1.11474	0	1.16635	0
Ubxn7	-1.01919	4.58636	5.73294	0	1.16563	0
D1Ertd622e	-3.98121	5.51	6.56104	0	1.16451	0
Naprt	-0.859942	1.33769	2.70722	0	1.16389	0
Atp5f1	-0.254798	0.350347	0.955491	0	1.16345	0
Alkbh1	-1.91098	4.65005	6.01959	0	1.16258	0
BC003331	-2.83462	5.70109	6.91138	0	1.16236	0
Ttc33	-1.40139	0	7.16618	0	1.16143	0
Zbtb8os	-1.30584	1.30584	7.22988	0	1.1607	0
Agrn	-1.33769	1.33769	6.68844	0	1.16061	0
Dnlz	-0.955491	1.11474	2.61167	0	1.15745	0
Mdga2	-2.10208	2.16578	6.05144	0	1.15675	0
Lace1	-1.27399	1.56063	3.59902	0	1.15496	0
Calcoco1	-0.923641	1.27399	2.70722	0	1.15495	0
Tulp4	-1.59248	5.0641	6.62474	0	1.1546	0
Slc25a10	-4.01306	0.0318497	5.98774	0	1.15329	0
Tefm	-0.541445	0.0318497	6.91138	0	1.15275	0
Grin3a	-0.254798	0.222948	1.14659	0	1.15242	0
Urod	-0.764393	0.796242	2.26133	0	1.15226	0
Kcnk1	-0.191098	0.286647	0.732543	0	1.15138	0
Mvb12a	-0.98734	1.01919	6.62474	0	1.15082	0
Ubxn4	-0.509595	0.668844	1.68803	0	1.14776	0
Zbtb14	-3.91751	0.0318497	6.65659	0	1.14719	0
Vps13d	-1.33769	5.09595	6.94323	0	1.14665	0
Chst1	-0.541445	0.668844	1.75173	0	1.14545	0
Dbnl	-1.01919	1.33769	2.99387	0	1.1431	0
Ddb1	-0.700693	1.30584	2.57982	0	1.14191	0
Tox	-1.97468	0.955491	2.29318	0	1.14185	0
Rnd3	-0.700693	0.796242	2.57982	0	1.14114	0
Gstm1	-0.191098	0.254798	0.636994	0	1.14086	0
Zic3	-0.636994	0.286647	1.62433	0	1.13889	0
Mrpl32	-1.40139	0.891791	3.43977	0	1.13843	0
Itgav	-0.382196	0.477745	1.33769	0	1.13815	0
Gnptab	-0.636994	0	7.58023	0	1.13731	0
Ctsl	-0.222948	0.318497	0.828092	0	1.13644	0
Ell	-3.50347	0	5.76479	0	1.13557	0
Auh	-0.923641	0.955491	7.19803	0	1.13531	0
Gpt2	-0.477745	0.541445	2.10208	0	1.13486	0
Trappc11	-4.23601	5.60555	6.81583	0	1.13229	0
Zc3hav1l	-1.75173	0.445896	1.81543	0	1.13184	0
Ppp2ca	-0.700693	0.891791	2.48428	0	1.13151	0
Golt1b	-0.414046	0.509595	1.52879	0	1.13077	0
Golph3l	-0.891791	1.17844	2.86647	0	1.13066	0
Xpo5	-4.20416	0	5.82849	0	1.12871	0
Zcchc7	-1.05104	1.68803	3.24867	0	1.1284	0
Ubr5	-1.14659	1.49694	2.77092	0	1.12797	0
Miip	-0.923641	1.71988	3.34422	0	1.12714	0
Trim2	-0.98734	1.14659	4.23601	0	1.12689	0
Raph1	-0.191098	0.222948	1.08289	0	1.12354	0
Pnp	-1.08289	1.01919	7.13433	0	1.12351	0
D330045A20Rik	-0.159248	0.159248	0.732543	0	1.12284	0
Calu	-0.509595	0.573294	1.84728	0	1.12245	0
Scara3	-0.318497	0.414046	1.08289	0	1.12225	0
Pkia	-1.24214	5.73294	6.87953	0	1.1219	0
Tor1a	-0.605144	0.605144	2.42058	0	1.12107	0
Relb	-0.0636994	0.0318497	6.21069	0	1.12016	0
Paxbp1	-1.21029	1.78358	3.72641	0	1.11973	0
Rdh9	-2.32503	2.73907	4.8093	0	1.1175	0
Ring1	-1.49694	4.55451	7.07063	0	1.11739	0
Atl3	-0.382196	0.0955491	6.01959	0	1.11689	0
Lrig1	-0.923641	0.573294	7.38913	0	1.11505	0
Myl12b	-0.477745	0.573294	1.59248	0	1.11496	0
Fam63b	-2.13393	6.11514	6.68844	0	1.11477	0
Dctn2	-0.764393	0.859942	2.35688	0	1.11088	0
Phospho2	-1.27399	1.08289	6.62474	0	1.1105	0
Tmem57	-4.29971	0.0636994	5.76479	0	1.11033	0
Ppp1r15a	-0.98734	0.636994	7.10248	0	1.10958	0
Ppp4r2	-3.47162	0.254798	5.73294	0	1.10903	0
Slc1a2	-0.191098	0.222948	0.605144	0	1.1089	0
Ift20	-1.24214	1.11474	2.54798	0	1.10755	0
Grpel1	-0.477745	0.509595	1.84728	0	1.10748	0
Trps1	-1.33769	0.732543	4.01306	0	1.10666	0
Pex3	-1.01919	1.17844	2.70722	0	1.10653	0
Bcar3	-0.98734	0.955491	2.93017	0	1.10532	0
Stx16	-1.56063	0.541445	5.0641	0	1.10309	0
Ppp1r3g	-0.605144	0.668844	1.87913	0	1.09793	0
Baz1b	-1.40139	1.11474	6.91138	0	1.09693	0
Elovl1	-0.923641	1.14659	2.67537	0	1.09383	0
Amacr	-4.36341	0	6.24254	0	1.0937	0
Per1	-3.28052	0.191098	5.86034	0	1.09155	0
Bex2	-1.11474	1.36954	6.30624	0	1.09134	0
Rap2b	-0.254798	0.286647	0.796242	0	1.09075	0
Fdx1	-0.732543	0.700693	2.67537	0	1.08719	0
Dnaja3	-1.01919	1.14659	2.67537	0	1.08586	0
Dcaf10	-0.891791	4.49081	5.1915	0	1.08288	0
Usp10	-0.98734	1.56063	3.34422	0	1.08232	0
Dpysl4	-0.955491	0.573294	6.91138	0	1.08222	0
Sobp	-0.222948	0.191098	4.52266	0	1.08219	0
Hnrnpu	-0.445896	0.509595	1.46509	0	1.0814	0
Ciapin1	-1.21029	5.95589	7.22988	0	1.08124	0
1600012H06Rik	-0.955491	1.05104	6.94323	0	1.08043	0
Hif3a	-2.19763	4.77745	6.21069	0	1.08038	0
Mios	-0.191098	0.0955491	5.86034	0	1.08007	0
Oaf	-0.286647	0.350347	0.955491	0	1.07983	0
Gbp7	-4.6819	0.0318497	6.97508	0	1.07888	0
Odf2	-1.14659	5.6374	6.84768	0	1.07827	0
Prr5	-1.17844	1.43324	2.80277	0	1.07676	0
Aldoart2	-0.159248	0.159248	0.764393	0	1.07668	0
Galnt16	-0.923641	0.732543	6.97508	0	1.07616	0
Mypop	-0.286647	0.254798	1.87913	0	1.07556	0
Luzp2	-0.350347	0.414046	0.98734	0	1.07548	0
Srp54c	-0.636994	0.668844	1.75173	0	1.07469	0
Adarb2	-1.05104	1.14659	2.64352	0	1.07459	0
Hspa5	-0.286647	0.350347	0.955491	0	1.073	0
Arhgef40	-1.27399	0.859942	6.52919	0	1.07222	0
Thrb	-2.26133	5.95589	6.59289	0	1.07214	0
Cadm1	-0.318497	0.350347	0.98734	0	1.0721	0
Aak1	-2.13393	2.86647	5.1915	0	1.07194	0
Mrpl21	-0.764393	0.859942	2.70722	0	1.07122	0
Opa3	-1.05104	1.05104	3.85381	0	1.06938	0
Tcf12	-1.11474	1.30584	3.72641	0	1.0677	0
Secisbp2	-5.0004	0.127399	5.3826	0	1.06731	0
Raver2	-1.01919	1.52879	2.99387	0	1.06085	0
Capza1	-1.36954	1.43324	2.70722	0	1.06031	0
Mif4gd	-0.891791	0.98734	2.48428	0	1.0603	0
Dctn3	-0.414046	0.414046	1.62433	0	1.05704	0
Gpt	-1.01919	1.62433	2.77092	0	1.05499	0
Nudcd1	-2.61167	5.4463	6.05144	0	1.0546	0
Srp68	-1.01919	1.52879	2.86647	0	1.05426	0
Igsf3	-0.222948	0.254798	0.764393	0	1.05388	0
Stra13	-1.21029	1.14659	2.93017	0	1.05293	0
Arfgef1	-0.891791	0.191098	5.76479	0	1.05293	0
Ube2h	-0.700693	0.796242	2.38873	0	1.05249	0
Efnb2	-2.83462	0	4.45896	0	1.05242	0
Ubl3	-0.414046	0.445896	1.30584	0	1.05198	0
Arih2	-1.49694	0.955491	6.72028	0	1.05115	0
Pgpep1	-0.286647	0.318497	0.891791	0	1.0511	0
Phactr1	-0.891791	0.955491	2.42058	0	1.04943	0
Nsun4	-1.11474	1.17844	3.08942	0	1.04896	0
Fh1	-0.414046	0.445896	1.49694	0	1.0486	0
Copb2	-1.14659	1.59248	2.89832	0	1.04837	0
Akt1s1	-0.98734	0.98734	2.64352	0	1.0476	0
Stau1	-1.11474	1.17844	2.64352	0	1.04724	0
Insig2	-1.08289	1.33769	2.64352	0	1.04664	0
Gpank1	-4.29971	0	6.84768	0	1.04623	0
Cdc16	-0.859942	0.764393	2.29318	0	1.04546	0
Erbb2	-4.6819	0	6.14699	0	1.04498	0
Acyp1	-1.40139	1.30584	2.99387	0	1.04393	0
Mdm2	-1.59248	1.08289	5.73294	0	1.04346	0
Slc38a9	-3.69456	0.0318497	6.52919	0	1.04251	0
Sub1	-0.286647	0.318497	0.891791	0	1.04198	0
Taf13	-0.859942	0.732543	2.61167	0	1.03976	0
Slc35e4	-0.98734	1.27399	2.61167	0	1.03848	0
Dand5	-0.222948	0.0636994	6.30624	0	1.03831	0
Prelid1	-0.828092	0.859942	2.42058	0	1.03653	0
Nr2e1	-0.541445	0.541445	1.71988	0	1.03644	0
Apln	-0.668844	0.700693	1.97468	0	1.0356	0
Zmynd11	-1.01919	1.17844	3.08942	0	1.03502	0
Snapc1	-1.27399	5.15965	7.07063	0	1.03444	0
Pithd1	-0.859942	0.859942	2.32503	0	1.03321	0
Pcgf1	-2.26133	0	6.56104	0	1.03245	0
Pgm2	-0.414046	0.445896	1.11474	0	1.03226	0
Psmc4	-0.382196	0.382196	1.27399	0	1.03187	0
Plcb1	-3.28052	0.0318497	6.75213	0	1.0315	0
Mical2	-4.14046	0.191098	6.59289	0	1.03143	0
Ednra	-4.26786	0.191098	5.92404	0	1.03006	0
Tubb5	-0.286647	0.318497	0.891791	0	1.02993	0
Abhd5	-1.01919	0.828092	7.07063	0	1.02825	0
Cox10	-0.350347	0.382196	1.11474	0	1.02802	0
Sirt3	-1.05104	0.764393	7.22988	0	1.02659	0
Osbpl1a	-0.636994	0.605144	2.22948	0	1.02572	0
Arpc4	-0.477745	0.477745	1.33769	0	1.02541	0
Nanos1	-0.414046	0.414046	1.40139	0	1.02517	0
Vsx1	-0.254798	0.222948	1.59248	0	1.02452	0
Csdc2	-0.350347	0.382196	1.11474	0	1.02441	0
Ap5m1	-4.04491	0	6.36994	0	1.02415	0
Ptms	-0.668844	0.636994	1.91098	0	1.0237	0
Zfp40	-1.40139	0.0636994	5.82849	0	1.02328	0
Gpc3	-0.509595	0.254798	5.4463	0	1.02321	0
Zfp318	-2.03838	3.02572	4.77745	0	1.02311	0
Edrf1	-1.62433	0	5.47815	0	1.0217	0
Tmem248	-1.11474	1.62433	3.21682	0	1.02044	0
Creb3	-0.509595	0.414046	2.42058	0	1.02023	0
Fstl1	-0.668844	0.159248	5.28705	0	1.01932	0
Celsr2	-1.68803	1.08289	6.65659	0	1.0191	0
Akap9	-0.636994	0.573294	1.71988	0	1.01838	0
6330549D23Rik	-1.71988	1.14659	2.67537	0	1.01836	0
Nbr1	-1.01919	1.17844	2.73907	0	1.01796	0
Adck3	-4.17231	0.159248	5.2552	0	1.01631	0
Fam89b	-4.17231	1.24214	2.67537	0	1.01467	0
2020-09-05	-1.65618	5.89219	6.75213	0	1.01373	0
Klf15	-0.541445	0.541445	1.87913	0	1.01343	0
Nrbp1	-0.796242	0.796242	2.61167	0	1.01332	0
Hspa2	-0.636994	0.573294	1.36954	0	1.01301	0
Tap1	-4.29971	0.0636994	5.3826	0	1.01291	0
Appl2	-0.286647	0.318497	0.923641	0	1.01199	0
Tspyl1	-0.668844	0.541445	2.73907	0	1.01094	0
Bard1	-0.668844	0.700693	1.91098	0	1.01015	0
2510009E07Rik	-3.91751	0	4.6819	0	1.00927	0
Wdr60	-4.52266	0	6.08329	0	1.00764	0
Tmem179b	-0.668844	0.605144	2.42058	0	1.00753	0
Dmpk	-3.08942	0	6.27439	0	1.00706	0
Mical1	-1.21029	1.36954	2.83462	0	1.00703	0
Odc1	-1.05104	1.21029	2.99387	0	1.00677	0
Pcyox1	-0.732543	0.605144	1.78358	0	1.0057	0
Dbt	-1.11474	1.21029	3.50347	0	1.00563	0
Dcbld1	-4.39526	0	6.65659	0	1.00471	0
Letmd1	-1.14659	1.30584	2.67537	0	1.00367	0
2210039B01Rik	-0.350347	0.159248	3.63086	0	1.00271	0
Zfp133-ps	-0.127399	0	6.52919	0	1.00228	0
Stard3nl	-1.14659	1.08289	2.73907	0	1.00199	0
Snx15	-4.6819	0.350347	6.14699	0	1.00186	0
Zfc3h1	-1.78358	0.923641	6.68844	0	1.00118	0
4930512M02Rik	-0.955491	1.08289	3.18497	0	1.00019	0
Suox	-1.40139	1.08289	2.80277	0	0.999716	0
Zfx	-0.127399	0	6.21069	0	0.999248	0
Camsap2	-5.03225	0.127399	5.47815	0	0.998606	0
Ntf5	-0.127399	0.0955491	0.573294	0	0.998552	0
D5Ertd615e	-0.573294	0.541445	4.45896	0	0.996532	0
Fbxo3	-1.17844	1.27399	2.67537	0	0.995912	0
Ssh2	-0.732543	0.700693	1.97468	0	0.994221	0
Ampd3	-1.30584	1.08289	3.05757	0	0.994174	0
Parl	-0.955491	0.668844	2.67537	0	0.992913	0
Selenbp2	-0.668844	0.445896	2.48428	0	0.992552	0
Aldh1l1	-0.350347	0.382196	1.05104	0	0.991579	0
Pdk2	-0.382196	0.350347	1.17844	0	0.99068	0
Sox6	-2.19763	4.8093	6.40179	0	0.990594	0
Wrnip1	-0.828092	0.605144	2.51613	0	0.98951	0
Srp72	-1.11474	1.14659	2.83462	0	0.989104	0
Sesn1	-1.11474	0.828092	2.35688	0	0.988868	0
Katnbl1	-1.46509	0.923641	7.00693	0	0.988856	0
Bmp4	-0.191098	0.159248	0.764393	0	0.986706	0
Plxdc2	-1.27399	5.54185	6.87953	0	0.986198	0
Nat1	-1.14659	1.24214	3.31237	0	0.985787	0
Vamp1	-0.127399	0	6.49734	0	0.983058	0
Aldh1a1	-1.11474	0.764393	6.30624	0	0.982916	0
Slc25a12	-1.05104	1.08289	2.51613	0	0.982141	0
Slc38a2	-0.191098	0.127399	0.700693	0	0.981742	0
Cryzl1	-0.764393	0.605144	1.71988	0	0.9814	0
Zbtb7b	-0.0955491	0.0318497	5.76479	0	0.979871	0
Vps16	-1.05104	0.955491	3.08942	0	0.979309	0
Hmgb3	-4.90485	0.222948	6.75213	0	0.977397	0
Cdk5	-1.21029	1.40139	2.80277	0	0.975807	0
Haus2	-2.54798	3.53532	4.9367	0	0.975175	0
Slitrk2	-0.254798	0.254798	0.732543	0	0.975081	0
Brd1	-0.414046	0.0318497	6.33809	0	0.97467	0
Kcnn3	-0.509595	0.445896	1.36954	0	0.974535	0
Cry1	-1.08289	1.40139	3.18497	0	0.974155	0
Lpar1	-0.254798	0.127399	5.82849	0	0.974027	0
Jmjd6	-4.45896	0	5.66924	0	0.973506	0
Rheb	-0.318497	0.318497	0.955491	0	0.972072	0
Phlpp1	-0.732543	0.636994	2.19763	0	0.971921	0
Pnn	-1.24214	0.955491	2.77092	0	0.970995	0
Bdp1	-0.605144	0	6.43364	0	0.969806	0
Cpsf3	-1.24214	1.36954	2.77092	0	0.969612	0
Brd4	-4.49081	1.27399	6.87953	0	0.968059	0
Ppp2r2b	-0.573294	0.445896	2.07023	0	0.967455	0
Dync1li1	-2.73907	3.63086	4.96855	0	0.966907	0
Aftph	-0.159248	-0.0318497	6.62474	0	0.966524	0
Coq3	-1.71988	0.318497	4.9367	0	0.965662	0
Zdhhc18	-0.254798	0	6.49734	0	0.965519	0
Zfp715	-4.873	0	6.27439	0	0.962975	0
Dnajc30	-1.33769	1.46509	2.80277	0	0.960646	0
Oxtr	-0.191098	0.159248	0.668844	0	0.959161	0
Maged1	-0.668844	0.541445	1.52879	0	0.957806	0
Sash1	-1.68803	0.955491	3.08942	0	0.957147	0
Lrrc58	-0.414046	0.414046	1.08289	0	0.956807	0
Acsbg1	-0.254798	0.222948	0.700693	0	0.956621	0
Gm8096	-0.445896	0.414046	1.46509	0	0.95609	0
Med29	-1.17844	1.24214	2.96202	0	0.95498	0
Aen	-1.01919	0.541445	7.19803	0	0.954853	0
Ddx24	-0.923641	0.605144	2.54798	0	0.953333	0
Dsg2	-0.509595	0.286647	1.87913	0	0.951727	0
Gmps	-2.45243	0.350347	5.41445	0	0.950192	0
Chst2	-0.445896	0.414046	1.17844	0	0.947295	0
Ccdc50	-1.52879	1.11474	6.72028	0	0.94699	0
Fam104a	-1.21029	1.01919	2.70722	0	0.946452	0
Nr2f6	-3.88566	0.222948	5.70109	0	0.944845	0
Arl10	-3.63086	0.0318497	4.77745	0	0.944699	0
Foxo1	-0.286647	0.286647	0.828092	0	0.944472	0
Pygm	-1.08289	0.509595	7.03878	0	0.943644	0
Fbxo32	-0.414046	0.159248	3.56717	0	0.94344	0
Dok5	-1.24214	1.05104	3.59902	0	0.943426	0
Prkd1	-1.05104	1.05104	2.89832	0	0.942437	0
Adsl	-0.573294	0.573294	1.56063	0	0.9419	0
Mthfd2l	-2.51613	2.77092	5.4463	0	0.939656	0
Gins4	-1.14659	0.668844	6.78398	0	0.938141	0
Ncstn	-0.668844	0.477745	2.32503	0	0.937849	0
Abca1	-0.509595	0.445896	1.43324	0	0.936267	0
Caprin1	-0.859942	0.732543	2.51613	0	0.935465	0
Wbp1l	-1.33769	0.891791	4.01306	0	0.935345	0
Fgfr1	-0.541445	0.445896	1.43324	0	0.935175	0
Rnf126	-4.90485	0.0955491	5.66924	0	0.934565	0
Iws1	-2.29318	3.43977	4.6819	0	0.93331	0
Amfr	-0.477745	0.445896	1.24214	0	0.932678	0
Msx1	-1.40139	0.605144	6.56104	0	0.932561	0
Mtmr10	-4.36341	0.0318497	6.24254	0	0.932408	0
Cry2	-0.764393	0.668844	1.97468	0	0.931625	0
Arpc1b	-0.286647	0.254798	0.764393	0	0.931382	0
Hs6st1	-4.49081	0.254798	5.35075	0	0.931016	0
Smad9	-0.445896	0.191098	1.78358	0	0.930645	0
Ddx21	-0.222948	-0.0318497	5.47815	0	0.929857	0
Taf4a	-0.127399	0.0318497	5.0004	0	0.929756	0
Tab2	-4.17231	0.0318497	6.46549	0	0.929207	0
Rpa1	-1.08289	1.24214	2.99387	0	0.926641	0
Rpp40	-3.53532	0.0955491	5.95589	0	0.926402	0
Gnl2	-1.21029	1.14659	2.93017	0	0.926387	0
Ak4	-1.05104	0.98734	3.08942	0	0.92515	0
Irgq	-4.17231	0.191098	5.3189	0	0.924988	0
Oplah	-1.14659	0.700693	2.35688	0	0.923488	0
Milr1	-0.509595	0.254798	1.71988	0	0.923188	0
Ip6k1	-1.24214	1.17844	2.77092	0	0.922222	0
Taldo1	-0.477745	0.382196	1.40139	0	0.921379	0
Alas1	-1.14659	1.14659	2.80277	0	0.921038	0
Ctnnd1	-1.40139	0.955491	2.80277	0	0.920873	0
Cdkn2aipnl	-1.21029	0.668844	6.14699	0	0.920239	0
Dolpp1	-1.21029	1.36954	2.86647	0	0.919777	0
Ap3m1	-0.573294	0.445896	1.81543	0	0.918793	0
Akap11	-1.59248	0.98734	5.82849	0	0.918699	0
Zbtb44	-0.254798	0.222948	0.668844	0	0.91791	0
Npr2	-4.90485	0.0636994	6.27439	0	0.917647	0
Zranb2	-0.732543	0.541445	2.19763	0	0.917241	0
Diap1	-0.0636994	0	5.73294	0	0.917219	0
Dcp2	-3.63086	0.222948	4.10861	0	0.916284	0
Mapre3	-1.21029	0.700693	7.16618	0	0.916223	0
Cx3cl1	-5.0004	0.159248	5.82849	0	0.915883	0
Gipc1	-1.11474	0.923641	2.35688	0	0.913906	0
Ehd1	-1.14659	0.700693	6.14699	0	0.913336	0
Cct7	-0.541445	0.445896	1.59248	0	0.912037	0
Lancl1	-1.11474	0.636994	6.72028	0	0.911518	0
Rrp36	-4.61821	-0.0318497	6.94323	0	0.911167	0
Psmd5	-1.17844	1.11474	2.93017	0	0.910963	0
Zfp207	-0.477745	0.414046	1.24214	0	0.910797	0
Sec31a	-1.21029	1.17844	3.02572	0	0.909674	0
Hdac5	-4.77745	0.0636994	4.58636	0	0.909559	0
Rusc2	-3.98121	0.0636994	4.61821	0	0.90951	0
Sp8	-0.509595	0.414046	1.62433	0	0.907936	0
Ifrd1	-1.11474	0.955491	2.64352	0	0.907208	0
Zfyve19	-3.82196	0.191098	5.86034	0	0.907057	0
Elovl4	-1.30584	1.11474	2.86647	0	0.905867	0
Nmnat1	-0.222948	0	6.62474	0	0.905561	0
Dcakd	-1.30584	1.21029	2.45243	0	0.904831	0
E2f8	-0.191098	0.159248	0.796242	0	0.904644	0
Exosc4	-0.318497	0.286647	0.859942	0	0.904144	0
Fgf23	-0.605144	0.222948	2.19763	0	0.90404	0
Hacl1	-1.11474	0.923641	2.93017	0	0.903785	0
Nckap1	-0.573294	0.477745	1.43324	0	0.903616	0
Nsg1	-1.36954	1.08289	2.83462	0	0.902875	0
Bcl11b	-0.477745	0.191098	2.03838	0	0.902867	0
Palm	-1.24214	1.40139	3.05757	0	0.902374	0
Bccip	-1.24214	1.08289	2.64352	0	0.902172	0
Actl6a	-2.48428	5.03225	6.81583	0	0.901546	0
Ttc13	-4.49081	0.0636994	6.56104	0	0.901159	0
Uqcc1	-1.30584	1.27399	2.70722	0	0.900664	0
Cyp4f15	-0.350347	0.286647	0.891791	0	0.89927	0
Bri3	-1.65618	1.59248	3.24867	0	0.898316	0
Hook3	-0.732543	0.541445	2.00653	0	0.897996	0
1810041L15Rik	-0.191098	0.0636994	5.6374	0	0.897959	0
Prss56	-1.40139	1.94283	2.80277	0	0.896808	0
Dpp8	-4.6819	0.159248	6.40179	0	0.895503	0
Tmed5	-0.414046	0.350347	0.98734	0	0.894804	0
Mapkapk3	-0.222948	0	6.21069	0	0.893942	0
A430085M09Rik	-0.541445	0	3.43977	0	0.893813	0
Otog	-0.254798	0.191098	0.796242	0	0.893747	0
Aip	-1.21029	0.98734	2.57982	0	0.893123	0
Pcnt	-3.75826	0.0318497	6.24254	0	0.892198	0
Golga4	-4.49081	0	5.66924	0	0.892194	0
Tial1	-0.477745	0.382196	1.17844	0	0.891489	0
Ebf1	-0.318497	0.191098	1.40139	0	0.891096	0
Grb2	-4.29971	0.286647	6.62474	0	0.890746	0
Kif26a	-0.254798	0.159248	0.923641	0	0.890602	0
Rpl37rt	-0.859942	0.573294	4.52266	0	0.890117	0
Wdfy1	-0.286647	0.222948	0.700693	0	0.889962	0
Enpp2	-1.14659	1.49694	2.61167	0	0.88984	0
Fgfr2	-0.573294	0.445896	1.46509	0	0.889521	0
Tm2d3	-0.636994	0.445896	1.59248	0	0.888076	0
Ccng2	-3.94936	0.0318497	5.47815	0	0.886483	0
Nfe2l1	-4.33156	0.0636994	6.43364	0	0.88641	0
Srsf6	-0.668844	0.509595	2.00653	0	0.886162	0
Taok1	-1.49694	0.98734	5.60555	0	0.886	0
1810043G02Rik	-1.14659	0.573294	6.78398	0	0.885915	0
Dcaf8	-1.24214	0.98734	2.86647	0	0.88448	0
Actr1b	-1.27399	1.08289	2.73907	0	0.883676	0
Zfp292	-2.45243	0.636994	6.46549	0	0.88248	0
Lca5	-4.45896	0	6.97508	0	0.882265	0
Il21	-0.191098	0.0955491	0.668844	0	0.881381	0
Slc25a38	-4.42711	0.0318497	6.46549	0	0.88131	0
Rnf130	-0.859942	0.636994	1.71988	0	0.881283	0
Lmbrd1	-0.382196	0.286647	0.955491	0	0.881103	0
Slc22a8	-0.159248	0.0955491	0.764393	0	0.880856	0
Gfod2	-4.39526	0.0318497	5.70109	0	0.879886	0
Itfg1	-0.414046	0.318497	1.11474	0	0.879841	0
Lrrc32	-0.222948	0.127399	0.636994	0	0.879734	0
Mamdc2	-2.26133	0	6.01959	0	0.879693	0
Txndc9	-0.541445	0.414046	1.40139	0	0.87933	0
Zmat5	-0.605144	0.445896	1.65618	0	0.877243	0
Herpud1	-0.445896	0.350347	1.14659	0	0.876673	0
Acsl6	-0.286647	0.222948	0.732543	0	0.876544	0
Pnrc1	-1.27399	1.05104	2.67537	0	0.87558	0
Mtmr14	-4.90485	0.0636994	0.668844	0	0.87538	0
Rims2	-2.70722	4.58636	5.95589	0	0.874058	0
Ccl27a	-2.38873	3.72641	6.36994	0	0.873537	0
Stip1	-0.891791	0.605144	2.22948	0	0.872885	0
Inppl1	-4.6819	0	6.49734	0	0.871911	0
1500004A13Rik	-2.10208	0.191098	3.05757	0	0.869813	0
Rrnad1	-2.99387	3.56717	4.71375	0	0.868837	0
Jade1	-4.61821	0.350347	6.01959	0	0.868419	0
Cltc	-0.414046	0.318497	0.955491	0	0.868372	0
D030056L22Rik	-4.8093	0	6.49734	0	0.868203	0
Jph3	-0.254798	0.222948	0.636994	0	0.867847	0
Rangap1	-3.40792	2.96202	5.76479	0	0.8666	0
Ufd1l	-0.573294	0.414046	1.30584	0	0.866357	0
Usp37	-0.318497	0.254798	0.764393	0	0.866266	0
Braf	-2.57982	1.05104	5.35075	0	0.86599	0
Efhd2	-0.541445	0.382196	1.49694	0	0.86598	0
Ccdc34	-1.59248	1.05104	3.12127	0	0.865199	0
Tor3a	-1.08289	0.541445	2.42058	0	0.864928	0
Ik	-1.01919	0.796242	2.38873	0	0.864819	0
Zfp930	-2.64352	4.61821	5.79664	0	0.864795	0
2610035D17Rik	-1.21029	1.49694	2.83462	0	0.864562	0
Cpne1	-1.14659	0.828092	3.12127	0	0.863983	0
Htatsf1	-5.1915	0.0636994	6.65659	0	0.863721	0
Atn1	-1.40139	0.828092	3.12127	0	0.863044	0
Mlx	-5.0004	0.0318497	6.27439	0	0.862705	0
Dars2	-2.10208	3.63086	5.51	0	0.862505	0
E2f6	-4.8093	0	5.95589	0	0.862456	0
Zbtb5	-0.222948	-0.0318497	6.05144	0	0.861558	0
Timmdc1	-0.318497	0.254798	0.732543	0	0.861494	0
Eci1	-0.414046	0.318497	1.01919	0	0.860602	0
Fuca1	-0.414046	0.350347	1.05104	0	0.859659	0
Atad1	-0.668844	0.445896	1.59248	0	0.859644	0
Parp16	-4.42711	0.0318497	6.21069	0	0.858997	0
Knop1	-2.93017	3.31237	4.58636	0	0.858705	0
Nfyc	-1.33769	1.33769	2.73907	0	0.858183	0
Pigq	-1.36954	1.24214	2.57982	0	0.857514	0
Snta1	-0.859942	0.445896	2.26133	0	0.857406	0
Cadm2	-0.509595	0.382196	1.14659	0	0.85684	0
Ankrd9	-3.79011	0.0318497	5.79664	0	0.855728	0
Creld1	-4.8093	0.0636994	6.08329	0	0.855588	0
Fech	-1.21029	1.21029	2.42058	0	0.855035	0
Tmem106b	-0.891791	0.668844	2.22948	0	0.853927	0
Bckdhb	-0.573294	0.414046	1.21029	0	0.853753	0
Tuba1c	-0.636994	0.477745	1.71988	0	0.853212	0
BC037034	-0.350347	0	6.08329	0	0.852804	0
Zfp354c	-3.82196	0	5.22335	0	0.852087	0
Ehmt2	-4.55451	0.191098	5.70109	0	0.851553	0
Rbsn	-4.49081	0.127399	6.05144	0	0.85153	0
Abcf3	-1.40139	1.46509	2.86647	0	0.850827	0
Cklf	-1.59248	1.24214	2.83462	0	0.849753	0
Ldhb	-0.254798	0.191098	0.605144	0	0.849376	0
Mthfs	-1.97468	1.17844	3.66271	0	0.849114	0
Tmem126a	-0.509595	0.382196	1.40139	0	0.84908	0
Lrrc49	-1.97468	0.477745	6.91138	0	0.848208	0
4933413J09Rik	-0.318497	0.159248	0.955491	0	0.846032	0
Cttnbp2nl	-1.27399	0	5.2552	0	0.844755	0
Selo	-1.40139	5.03225	6.40179	0	0.844378	0
Atp1a4	-0.382196	0.191098	1.62433	0	0.844303	0
Scp2	-0.350347	0.254798	0.923641	0	0.844237	0
Gm9079	-0.445896	0.127399	0.828092	0	0.844149	0
Mfhas1	-4.07676	0.0955491	5.95589	0	0.843646	0
Gtf3c5	-1.24214	0.891791	3.24867	0	0.842467	0
Metap1	-1.17844	0.796242	3.08942	0	0.841809	0
Cd33	-0.254798	0.159248	1.65618	0	0.841269	0
Mkrn1	-1.49694	0.700693	7.03878	0	0.840357	0
Med27	-1.11474	0.764393	2.48428	0	0.839903	0
1110012L19Rik	-1.30584	1.43324	2.86647	0	0.838456	0
Negr1	-1.40139	0.605144	4.01306	0	0.837113	0
Med15	-1.43324	0.605144	6.72028	0	0.836756	0
Scfd1	-1.46509	1.30584	2.77092	0	0.83628	0
Rtn1	-0.859942	0.477745	1.75173	0	0.835825	0
Spcs3	-1.21029	0.891791	2.61167	0	0.835447	0
Eme2	-0.668844	0.0636994	5.95589	0	0.835286	0
Tmppe	-0.286647	0.222948	0.668844	0	0.833538	0
Lpl	-0.700693	0.127399	2.80277	0	0.833157	0
Zdhhc24	-1.08289	0.668844	3.21682	0	0.832029	0
Msantd4	-4.61821	0	6.30624	0	0.831903	0
Zfp759	-0.923641	0.222948	4.33156	0	0.829076	0
Smc3	-1.24214	1.14659	2.89832	0	0.828845	0
Lrrc4b	-1.68803	0.509595	3.15312	0	0.828667	0
Ggnbp2os	-1.68803	1.36954	3.08942	0	0.82851	0
Rpusd2	-1.71988	0.191098	2.13393	0	0.828309	0
Fads2	-0.350347	0.286647	0.828092	0	0.827351	0
Apba3	-4.96855	0	7.22988	0	0.826999	0
Pik3ca	-3.28052	5.22335	6.01959	0	0.82694	0
Ogg1	-3.59902	0.0318497	5.0004	0	0.826759	0
Gm6756	-0.541445	0.350347	1.84728	0	0.825496	0
Fam134a	-1.21029	0.955491	2.86647	0	0.825447	0
Sik1	-0.318497	0.222948	0.732543	0	0.825364	0
Ube2d2a	-0.509595	0.350347	1.11474	0	0.824659	0
Amot	-0.573294	0.254798	3.82196	0	0.822202	0
Zfp638	-1.59248	0.541445	4.07676	0	0.822166	0
Fbxo18	-1.14659	0.859942	3.21682	0	0.821933	0
Kcnj16	-4.77745	0.0318497	6.27439	0	0.821265	0
Vmn2r29	-0.668844	0	6.59289	0	0.821234	0
Ncf2	-0.191098	0.0636994	1.08289	0	0.820852	0
Slc12a6	-2.83462	0.127399	4.45896	0	0.820692	0
Qsox2	-5.0004	0.0955491	4.29971	0	0.81988	0
Ccnl2	-0.668844	0.414046	2.03838	0	0.819618	0
Il17ra	-1.52879	0.0955491	5.66924	0	0.819247	0
Lgals3bp	-0.636994	0.414046	1.71988	0	0.818596	0
Fam181b	-0.541445	0.382196	1.36954	0	0.817867	0
Smg7	-2.32503	0.764393	4.01306	0	0.817039	0
Clmn	-0.668844	0.382196	1.59248	0	0.81676	0
Acin1	-2.26133	1.01919	4.17231	0	0.81538	0
Cpe	-0.318497	0.191098	0.605144	0	0.815359	0
Gm4285	-0.636994	0.382196	1.56063	0	0.815172	0
Tmem259	-2.26133	5.0004	6.49734	0	0.813863	0
Cap1	-0.318497	0.222948	0.700693	0	0.813107	0
Psen2	-1.30584	1.14659	2.93017	0	0.812686	0
Ncdn	-1.43324	0.764393	5.73294	0	0.811972	0
Sqstm1	-0.414046	0.286647	0.923641	0	0.811265	0
B3galt1	-0.573294	0.382196	1.33769	0	0.810975	0
Cnot7	-1.59248	1.01919	2.83462	0	0.810279	0
Bub3	-1.36954	1.05104	2.54798	0	0.809501	0
Sf1	-1.27399	0.859942	2.61167	0	0.809086	0
Ascl4	-0.605144	0.445896	1.65618	0	0.808695	0
Mcm4	-0.414046	-0.0318497	6.59289	0	0.808443	0
Kif3a	-0.318497	0.222948	0.764393	0	0.808395	0
Rtn4	-1.75173	0.955491	3.02572	0	0.807716	0
Eefsec	-5.28705	0.0318497	6.27439	0	0.806395	0
Npat	-1.84728	-0.0318497	6.91138	0	0.806213	0
Arpc5	-0.764393	0.414046	2.03838	0	0.8057	0
Blvrb	-1.46509	0.98734	5.60555	0	0.805181	0
Gm12992	-1.01919	0.254798	2.64352	0	0.804678	0
Rxrb	-5.03225	0	7.35728	0	0.80413	0
Fam114a1	-4.20416	0.0955491	0.923641	0	0.804091	0
Slc31a2	-1.36954	0.350347	6.33809	0	0.803638	0
Mcat	-0.573294	0	6.65659	0	0.803262	0
Wdr18	-1.43324	0.923641	2.64352	0	0.802987	0
Bpnt1	-0.350347	0.254798	0.859942	0	0.801538	0
Polr2b	-1.14659	0.573294	3.05757	0	0.80038	0
Rab1	-0.445896	0.318497	1.05104	0	0.799365	0
Chpf	-1.43324	1.05104	3.05757	0	0.798938	0
Pitpnc1	-0.445896	0.318497	0.98734	0	0.798776	0
9430037G07Rik	-0.573294	0.382196	1.46509	0	0.797727	0
Timm22	-0.541445	0.382196	1.21029	0	0.797452	0
Eppk1	-0.318497	0.159248	1.33769	0	0.79702	0
9130024F11Rik	-0.222948	0.127399	0.668844	0	0.796804	0
Cdkn1b	-0.350347	0.222948	0.764393	0	0.795651	0
Ewsr1	-0.796242	0.509595	1.65618	0	0.795388	0
Zfp637	-1.46509	1.21029	2.61167	0	0.794987	0
Eif3c	-1.01919	0.573294	2.10208	0	0.79487	0
Gm6644	-1.24214	0.859942	2.38873	0	0.793694	0
Ptpn2	-0.605144	0.0955491	5.09595	0	0.793186	0
Nlrp1a	-1.68803	0.382196	2.07023	0	0.792641	0
1700027H10Rik	-0.350347	0.159248	1.94283	0	0.792299	0
Hivep2	-4.61821	0.0955491	4.36341	0	0.792222	0
Hdgfl1	-0.350347	0.159248	1.30584	0	0.792216	0
Ctdspl2	-1.91098	0.700693	3.91751	0	0.792177	0
Lman2	-0.605144	0.382196	1.36954	0	0.791379	0
Cxcr4	-0.191098	0.0955491	0.573294	0	0.790691	0
2010315B03Rik	-2.64352	3.75826	4.77745	0	0.790568	0
Ckap5	-0.509595	0.350347	1.14659	0	0.790427	0
Ramp2	-1.43324	0.98734	2.96202	0	0.789591	0
Cnnm2	-3.69456	0	5.95589	0	0.788767	0
Utp18	-1.62433	0.700693	4.04491	0	0.787661	0
Sgpp1	-1.56063	0.350347	6.68844	0	0.787014	0
Fam217b	-1.65618	0.859942	6.56104	0	0.786348	0
Stat5b	-3.43977	-0.0955491	6.14699	0	0.786297	0
Itgb4	-0.254798	0.127399	0.796242	0	0.786205	0
Morc3	-4.84115	0.127399	6.43364	0	0.786107	0
Mpzl1	-1.40139	1.27399	2.48428	0	0.785519	0
Gfpt2	-5.28705	0	6.24254	0	0.785298	0
Zfp830	-3.08942	3.34422	4.61821	0	0.784163	0
Eprs	-1.21029	0.796242	2.48428	0	0.782967	0
Nsmce2	-1.46509	1.01919	2.83462	0	0.782877	0
Zdhhc6	-5.0004	0	5.86034	0	0.782803	0
Polr2e	-0.923641	0.445896	2.13393	0	0.782078	0
Dld	-0.891791	0.541445	1.84728	0	0.78062	0
Ulk3	-3.18497	3.18497	5.73294	0	0.780388	0
2810004N23Rik	-4.49081	0	6.33809	0	0.779254	0
Xrcc4	-1.46509	0.636994	6.97508	0	0.778015	0
Tgoln1	-1.30584	0.891791	2.67537	0	0.777402	0
Alg8	-4.58636	0.0318497	5.28705	0	0.77703	0
Slc29a2	-1.21029	0.445896	6.75213	0	0.77676	0
Rpl36a	-0.891791	0.477745	2.13393	0	0.775657	0
Alkbh5	-0.382196	0.254798	0.828092	0	0.775498	0
Strip1	-1.30584	0.700693	2.70722	0	0.775244	0
Gm10371	-0.350347	0.159248	1.21029	0	0.774482	0
Farsa	-1.17844	0.700693	2.64352	0	0.774049	0
Arid4a	-4.45896	0	6.52919	0	0.773747	0
Sf3b3	-1.27399	0.764393	2.96202	0	0.772952	0
Lsm10	-1.49694	1.08289	2.67537	0	0.772714	0
Got2	-1.46509	0.541445	6.75213	0	0.771795	0
Cystm1	-0.414046	0.254798	0.891791	0	0.771606	0
Usp11	-1.46509	0.891791	2.67537	0	0.771239	0
Prdm5	-3.75826	0.0318497	5.22335	0	0.770995	0
Tmed7	-0.573294	0.350347	1.30584	0	0.77055	0
Def8	-0.159248	0.0318497	5.70109	0	0.770322	0
Yars	-1.24214	0.955491	2.45243	0	0.770018	0
Entpd1	-1.75173	0.509595	6.72028	0	0.769922	0
Usp5	-1.52879	0.796242	7.58023	0	0.769266	0
Pvrl2	-5.1278	0.0318497	6.78398	0	0.768267	0
Sephs2	-1.91098	1.21029	5.66924	0	0.767819	0
F830016B08Rik	-1.75173	3.34422	4.29971	0	0.767772	0
Scpep1	-1.40139	1.05104	2.64352	0	0.767714	0
Gdf10	-0.764393	0.382196	1.87913	0	0.76725	0
3830406C13Rik	-1.27399	0.764393	2.26133	0	0.76675	0
Lonp2	-0.573294	0.318497	1.36954	0	0.765534	0
Ctdsp1	-1.49694	0.891791	2.29318	0	0.765324	0
Mrpl53	-1.65618	1.08289	2.80277	0	0.765069	0
Ube2v2	-0.573294	0.382196	1.17844	0	0.764902	0
Tmem251	-1.56063	0.732543	6.17884	0	0.763566	0
Glipr2	-0.350347	-0.0318497	6.68844	0	0.76356	0
Snx1	-1.11474	0.509595	2.19763	0	0.763533	0
Id4	-0.350347	0.222948	0.796242	0	0.763347	0
Gm10012	-0.605144	0.382196	1.56063	0	0.762993	0
Stx4a	-2.32503	1.05104	2.80277	0	0.762983	0
Rere	-1.52879	1.01919	3.05757	0	0.762126	0
Ccnd3	-1.17844	0.828092	2.29318	0	0.761823	0
Sec63	-4.61821	0.127399	5.82849	0	0.761346	0
Ift52	-5.15965	0.159248	6.24254	0	0.761312	0
Nfatc1	-4.90485	0	6.01959	0	0.760789	0
Ift43	-1.49694	0.98734	2.77092	0	0.760771	0
Fgd1	-4.77745	0.127399	1.65618	0	0.759885	0
Nprl2	-1.33769	0.955491	2.48428	0	0.759712	0
Med25	-1.11474	0.796242	2.13393	0	0.759659	0
Arnt2	-1.27399	0.764393	2.57982	0	0.759024	0
Men1	-1.40139	1.01919	2.67537	0	0.757583	0
Hist1h4h	-1.91098	0.796242	6.56104	0	0.757504	0
Rab24	-0.828092	0.445896	1.78358	0	0.757477	0
Ctc1	-0.191098	0.0318497	5.95589	0	0.757113	0
Dnajb9	-0.573294	0.318497	1.40139	0	0.756948	0
Mpp3	-4.6819	0.286647	1.05104	0	0.756876	0
Mex3c	-5.03225	0	6.52919	0	0.756539	0
Fam214a	-2.29318	0.445896	6.59289	0	0.756203	0
Dlx1as	-0.254798	0.127399	0.923641	0	0.755238	0
Abca2	-1.68803	0.859942	2.67537	0	0.754772	0
Scn8a	-1.11474	0.668844	4.71375	0	0.754072	0
Siah1a	-4.71375	0.0318497	6.65659	0	0.753757	0
Ndufb10	-0.350347	0.222948	0.764393	0	0.753524	0
Asph	-1.14659	0.668844	2.45243	0	0.753513	0
Pura	-4.77745	0	6.62474	0	0.753134	0
Pld1	-1.46509	0.382196	6.17884	0	0.752742	0
1700034H15Rik	-0.636994	0.318497	4.8093	0	0.752575	0
Pak2	-1.33769	0.796242	2.51613	0	0.752331	0
Ssbp3	-0.382196	-0.0955491	6.56104	0	0.752064	0
BC023829	-1.30584	0.859942	2.48428	0	0.752045	0
Ugt1a6b	-3.31237	0.127399	5.82849	0	0.751105	0
Pcdhgc4	-3.72641	0	3.63086	0	0.750853	0
Fam120b	-1.14659	0.605144	2.57982	0	0.750713	0
Rexo1	-0.159248	0	4.8093	0	0.750253	0
Il7r	-0.286647	0.159248	0.700693	0	0.749731	0
Lgals1	-1.40139	0.828092	2.54798	0	0.749585	0
Ice1	-5.0004	0.0955491	6.24254	0	0.749415	0
Ahsa1	-1.11474	0.541445	2.45243	0	0.748185	0
Kpnb1	-1.33769	0.891791	2.93017	0	0.748161	0
Gpr137b-ps	-1.17844	0.382196	6.46549	0	0.747987	0
Rpa3	-4.14046	0	6.49734	0	0.747329	0
Itga11	-0.286647	0.127399	0.764393	0	0.745769	0
Adam22	-0.318497	0.191098	0.636994	0	0.745623	0
Apoo-ps	-2.73907	0.350347	3.91751	0	0.745235	0
Gnl3l	-0.668844	0.382196	1.49694	0	0.744444	0
Zfp445	-1.40139	0.764393	5.03225	0	0.744173	0
Lims1	-1.52879	1.11474	2.61167	0	0.74408	0
Golph3	-0.764393	0.414046	1.52879	0	0.744032	0
Spg21	-1.33769	0.923641	2.48428	0	0.743873	0
Bicd1	-4.96855	0.191098	6.33809	0	0.743794	0
Mpdz	-4.58636	0	2.10208	0	0.743658	0
Arhgef26	-1.27399	0.700693	2.48428	0	0.743558	0
Zfp58	-0.636994	0.0318497	5.73294	0	0.743197	0
Cdc25c	-0.254798	0.127399	0.764393	0	0.742302	0
Twf1	-0.573294	0.350347	1.08289	0	0.741969	0
Tars2	-1.46509	0.477745	6.24254	0	0.741966	0
Osbpl8	-3.15312	2.77092	5.86034	0	0.741516	0
Pigv	-0.573294	0.318497	1.24214	0	0.741342	0
Pibf1	-4.04491	0.0318497	5.51	0	0.741035	0
Rnmtl1	-0.191098	0	6.87953	0	0.740699	0
Nek6	-1.33769	1.21029	2.57982	0	0.740373	0
Ephx1	-0.891791	0.382196	2.45243	0	0.740276	0
Cog7	-1.30584	1.01919	2.64352	0	0.739951	0
Btc	-0.286647	0.127399	5.0004	0	0.73938	0
Slbp	-1.43324	0.700693	2.83462	0	0.738877	0
Gm1821	-0.318497	0.191098	0.636994	0	0.738594	0
Pcsk2	-0.191098	0.0955491	0.541445	0	0.738328	0
Tarbp2	-4.61821	0	6.36994	0	0.738238	0
Zfp316	-3.91751	4.14046	5.0004	0	0.735197	0
Cenpf	-4.20416	0.286647	4.90485	0	0.735151	0
Cstf1	-0.445896	-0.0318497	6.14699	0	0.735142	0
Slc39a10	-1.52879	0.891791	2.54798	0	0.734903	0
Ubald1	-1.40139	1.01919	2.93017	0	0.73488	0
Abca6	-0.222948	0.0636994	1.14659	0	0.733978	0
Ptgr2	-0.732543	0.350347	1.78358	0	0.733569	0
Pdhx	-1.30584	0.796242	2.42058	0	0.732649	0
Cdc23	-1.36954	0.573294	2.42058	0	0.732554	0
Zranb1	-4.33156	0	4.29971	0	0.732248	0
Nop10	-0.668844	0.350347	1.68803	0	0.731668	0
Rbmxl1	-5.47815	0.0636994	7.22988	0	0.731606	0
Arl14ep	-1.62433	1.01919	2.70722	0	0.730239	0
Slmo2	-1.14659	0.414046	2.42058	0	0.729896	0
Slc35f1	-0.955491	-0.159248	6.01959	0	0.729611	0
Lamtor1	-0.98734	0.445896	1.68803	0	0.727839	0
Naip5	-2.16578	1.30584	4.14046	0	0.72718	0
Tcf25	-0.764393	0.414046	1.40139	0	0.725734	0
Trmt2a	-1.33769	0.668844	2.57982	0	0.725251	0
Rbm25	-0.923641	0.509595	1.52879	0	0.724501	0
Leng1	-1.62433	0.828092	7.07063	0	0.72427	0
Erp44	-0.636994	0.318497	1.33769	0	0.72383	0
Kat6b	-2.57982	0	6.33809	0	0.723394	0
Ctnnb1	-4.77745	0.382196	6.14699	0	0.72338	0
Mrpl12	-1.46509	0.764393	2.54798	0	0.723264	0
Mettl6	-4.873	0	6.56104	0	0.722562	0
Cab39l	-0.732543	0	6.36994	0	0.722385	0
Nras	-0.382196	0.222948	0.764393	0	0.72219	0
Htr1d	-0.318497	0.159248	1.17844	0	0.721234	0
Isy1	-5.09595	0.0636994	5.66924	0	0.721105	0
Auts2	-5.15965	0.668844	6.21069	0	0.721073	0
Arid2	-3.34422	3.28052	5.5737	0	0.720848	0
Oas1b	-1.40139	0.191098	4.42711	0	0.720424	0
Cmas	-4.77745	0.0318497	5.92404	0	0.720392	0
Hivep3	-1.14659	0.0636994	5.6374	0	0.719769	0
Acy1	-1.43324	0.636994	6.17884	0	0.718717	0
Magt1	-0.668844	0.382196	1.30584	0	0.718618	0
Cml1	-0.414046	0.254798	0.891791	0	0.717605	0
Sass6	-0.796242	0.414046	4.29971	0	0.71733	0
Rpgr	-4.26786	0.0636994	0.923641	0	0.717136	0
Rtkn	-3.08942	0	6.36994	0	0.716956	0
Tsc22d1	-0.477745	0.286647	1.05104	0	0.716871	0
Unc13a	-0.191098	0.0636994	3.98121	0	0.716837	0
Atp1b2	-0.286647	0.159248	0.509595	0	0.716836	0
Vmn1r63	-0.254798	0.127399	0.700693	0	0.716082	0
Acadm	-0.477745	0.254798	1.17844	0	0.715665	0
Smim11	-0.923641	0.445896	2.13393	0	0.715156	0
Rpl14-ps1	-2.64352	0.0955491	3.91751	0	0.714761	0
Trpm7	-0.828092	0.382196	1.71988	0	0.714408	0
Slc50a1	-1.49694	0.923641	2.51613	0	0.714278	0
Hdlbp	-1.40139	0.350347	6.68844	0	0.714157	0
St7l	-1.27399	0.477745	2.38873	0	0.714058	0
Pus7	-2.00653	0.0636994	5.5737	0	0.713973	0
Uba3	-0.891791	0.445896	1.68803	0	0.713902	0
Tenm4	-4.96855	0.0955491	0.541445	0	0.713827	0
Nxt1	-4.58636	0	6.05144	0	0.713823	0
Gdi1	-0.541445	0.318497	1.17844	0	0.713553	0
Gprc5c	-2.03838	0.732543	1.91098	0	0.713407	0
Fahd2a	-1.36954	0.859942	2.80277	0	0.71331	0
Zfp653	-4.58636	0.254798	5.66924	0	0.712957	0
Ppil4	-1.75173	1.08289	2.61167	0	0.712794	0
R3hdm2	-4.8093	0	5.03225	0	0.712714	0
Ttc5	-0.382196	0.191098	0.923641	0	0.712562	0
Nrp1	-2.35688	0.796242	3.18497	0	0.711979	0
Farp1	-1.49694	0.764393	2.13393	0	0.711976	0
Gm10190	-0.732543	0.382196	2.00653	0	0.711897	0
Vwa1	-1.62433	1.65618	2.83462	0	0.711723	0
Aldh7a1	-0.541445	0.286647	1.14659	0	0.71143	0
Mybl1	-0.318497	0.191098	0.668844	0	0.711381	0
Pptc7	-3.18497	3.21682	4.52266	0	0.711171	0
Clcc1	-0.732543	0.350347	1.78358	0	0.7109	0
Heatr5a	-0.891791	0.286647	4.90485	0	0.710031	0
Fam151a	-0.477745	0.0955491	2.48428	0	0.709795	0
Csnk2a1	-0.350347	0.191098	0.700693	0	0.708944	0
Tyms-ps	-0.286647	0.0955491	0.732543	0	0.708491	0
Sox1	-1.49694	0.891791	3.18497	0	0.707838	0
Slc23a2	-4.8093	0.796242	2.89832	0	0.707315	0
Rpl4	-0.414046	0.222948	0.859942	0	0.707245	0
Etv5	-1.08289	0.414046	2.32503	0	0.706816	0
Api5	-1.56063	0.891791	2.51613	0	0.70656	0
Hbegf	-0.828092	0.350347	1.97468	0	0.706531	0
Icmt	-0.159248	0.0318497	5.3826	0	0.70636	0
Yae1d1	-1.62433	1.21029	2.61167	0	0.705568	0
Stard3	-4.01306	0	5.66924	0	0.705451	0
Pgf	-0.191098	0	5.92404	0	0.705096	0
Cd99l2	-1.52879	1.01919	2.70722	0	0.704617	0
Pitpnb	-1.59248	1.01919	2.57982	0	0.703657	0
Peli2	-4.58636	0.191098	6.05144	0	0.703647	0
Foxf1	-0.222948	0.0955491	0.573294	0	0.703189	0
Ppie	-1.75173	0.191098	6.75213	0	0.702734	0
Pradc1	-1.52879	1.27399	2.73907	0	0.702577	0
Slc37a4	-1.49694	0.828092	2.67537	0	0.702322	0
Trip10	-3.82196	0	5.5737	0	0.702007	0
Ciao1	-1.49694	0.891791	2.29318	0	0.701808	0
Ext1	-4.90485	0	1.36954	0	0.701744	0
Atxn2	-2.54798	0.859942	3.53532	0	0.701185	0
Eid1	-4.55451	0	4.96855	0	0.700363	0
1110059E24Rik	-1.65618	0.923641	3.66271	0	0.699893	0
Nup188	-0.0955491	0	5.79664	0	0.698917	0
Uri1	-5.1278	0.0636994	6.59289	0	0.698617	0
Zfp345	-0.605144	0.318497	1.33769	0	0.69812	0
Dhodh	-4.90485	0	6.14699	0	0.697195	0
AY074887	-3.47162	0.445896	4.65005	0	0.697116	0
Foxp2	-0.605144	0.318497	1.43324	0	0.696728	0
Esyt2	-5.1278	0	6.75213	0	0.69646	0
Car10	-0.318497	0.159248	1.17844	0	0.696408	0
Lrp6	-2.29318	0.0318497	5.66924	0	0.69635	0
Slc6a18	-1.14659	0.605144	2.10208	0	0.696232	0
Nat8l	-4.36341	0.0955491	4.36341	0	0.695702	0
Pgam5	-0.668844	0	6.40179	0	0.694861	0
Ssrp1	-1.30584	0.605144	2.86647	0	0.693993	0
Gstz1	-0.955491	0.477745	1.75173	0	0.691748	0
Phka1	-1.59248	0.828092	2.48428	0	0.691234	0
Ssbp4	-1.17844	0.573294	2.10208	0	0.691006	0
Tubgcp6	-4.42711	0.254798	2.10208	0	0.690376	0
Tmem194	-4.04491	0.0318497	0.859942	0	0.689528	0
Nudt16	-0.923641	0	5.73294	0	0.689054	0
Fbxo10	-5.1278	0.0318497	5.22335	0	0.688367	0
Sox9	-0.350347	0.191098	0.700693	0	0.688224	0
Kat8	-5.0004	0.0318497	4.55451	0	0.687268	0
Ephb1	-1.56063	0.859942	2.29318	0	0.68718	0
Tnfrsf19	-0.636994	0.318497	1.24214	0	0.686943	0
Cyp46a1	-0.764393	0.350347	1.75173	0	0.686909	0
Slc25a42	-3.12127	0.382196	4.26786	0	0.686847	0
Rbm48	-3.34422	0	5.03225	0	0.686614	0
Camta1	-2.32503	1.30584	6.14699	0	0.686198	0
Ifnar1	-0.350347	0.191098	0.668844	0	0.685759	0
Zkscan1	-1.97468	0.923641	5.6374	0	0.685495	0
Kif1bp	-1.11474	0.414046	2.22948	0	0.685414	0
Tsr3	-1.59248	0.955491	2.73907	0	0.685217	0
Nfe2l2	-0.859942	0.350347	1.52879	0	0.684505	0
Cyb5r4	-0.254798	0	6.78398	0	0.684376	0
Dnmt3a	-1.49694	0.796242	2.67537	0	0.683456	0
Dennd4c	-4.7456	0	6.72028	0	0.683425	0
D630033O11Rik	-2.93017	2.93017	5.60555	0	0.683232	0
Pak1	-1.46509	0.796242	2.93017	0	0.682855	0
5830416P10Rik	-0.828092	0.414046	2.13393	0	0.682698	0
Hccs	-1.46509	0.796242	2.67537	0	0.681485	0
Frs2	-5.03225	0	4.20416	0	0.680628	0
Rnf180	-1.71988	0.573294	2.54798	0	0.680581	0
Hsdl2	-0.509595	0.254798	1.21029	0	0.679789	0
Gba2	-0.318497	0.0636994	5.54185	0	0.679052	0
Slc39a11	-5.09595	0	6.24254	0	0.67873	0
Tfip11	-5.0641	0.0318497	4.42711	0	0.678271	0
Gm12504	-0.732543	0.318497	1.87913	0	0.677308	0
Nosip	-1.14659	0.573294	2.00653	0	0.676996	0
Ttc26	-3.50347	3.79011	5.03225	0	0.676271	0
Zdhhc21	-3.88566	3.12127	6.17884	0	0.675346	0
Litaf	-5.1278	0.0318497	5.22335	0	0.675134	0
Arih1	-0.318497	0.0636994	5.5737	0	0.674786	0
Kdm7a	-4.10861	3.94936	5.54185	0	0.674553	0
Dqx1	-0.828092	0.127399	5.03225	0	0.67446	0
Gpx8	-1.14659	0.477745	1.43324	0	0.673908	0
Rpl35	-0.414046	0.222948	0.764393	0	0.673598	0
Fubp3	-0.828092	0.350347	1.59248	0	0.673337	0
Lincenc1	-0.318497	0.159248	0.859942	0	0.672828	0
Polr1c	-5.0641	0	5.22335	0	0.672512	0
Trappc12	-5.47815	0	7.45283	0	0.671933	0
Hrk	-0.222948	0.0955491	0.636994	0	0.671539	0
Itpripl1	-1.94283	0.700693	1.91098	0	0.67138	0
Tapbp	-0.668844	0.318497	1.17844	0	0.671201	0
Esco1	-1.52879	0.828092	3.18497	0	0.669763	0
Tmem65	-0.350347	0.0955491	0.891791	0	0.669345	0
Ldb1	-2.38873	1.17844	6.01959	0	0.669044	0
Tspan4	-1.59248	0.923641	2.35688	0	0.669006	0
Supt16	-0.350347	0.191098	0.668844	0	0.668637	0
Pgp	-0.477745	0.254798	0.98734	0	0.6671	0
Amer2	-4.23601	0.414046	6.33809	0	0.66621	0
Phf23	-5.0641	0	6.78398	0	0.665821	0
Bhlha15	-0.222948	0.127399	0.732543	0	0.665416	0
She	-0.382196	0.159248	0.700693	0	0.665339	0
Angel1	-5.15965	0	6.36994	0	0.665247	0
Tpm3	-1.17844	0.445896	2.16578	0	0.664948	0
BC003965	-1.65618	0.923641	2.38873	0	0.664475	0
Dbr1	-5.15965	0.191098	6.49734	0	0.664398	0
Cebpz	-2.38873	1.17844	3.15312	0	0.664273	0
Ppp6r3	-2.16578	0.636994	6.81583	0	0.663163	0
Fam126b	-4.04491	-0.0318497	6.30624	0	0.663099	0
Aifm1	-1.56063	0.764393	2.42058	0	0.661777	0
Atpaf2	-0.700693	0.159248	4.8093	0	0.661225	0
Nav2	-2.77092	0.445896	3.34422	0	0.660166	0
Crbn	-1.62433	0.955491	2.26133	0	0.659814	0
Snx10	-1.62433	0.98734	2.73907	0	0.658816	0
Plekhb1	-0.573294	0.254798	1.27399	0	0.658625	0
Rbms1	-2.35688	1.11474	2.89832	0	0.657173	0
Vit	-1.52879	1.01919	2.93017	0	0.656588	0
Als2cl	-1.91098	0.509595	1.65618	0	0.656433	0
Rnf38	-1.62433	0.828092	3.28052	0	0.656312	0
Gpc6	-1.08289	0.509595	1.62433	0	0.655981	0
Reck	-4.6819	0	5.51	0	0.655607	0
Tmbim6	-0.382196	0.191098	0.732543	0	0.655387	0
Zcchc18	-0.636994	0.286647	1.14659	0	0.654141	0
Pdp1	-5.22335	0	6.59289	0	0.654046	0
Rgs17	-0.318497	0.0955491	0.700693	0	0.653688	0
Inpp5b	-5.22335	-0.0318497	7.03878	0	0.653627	0
Ncaph2	-1.11474	0.445896	2.99387	0	0.652088	0
Sowahb	-0.222948	0.0955491	0.636994	0	0.651292	0
Cetn2	-1.78358	0.700693	6.97508	0	0.65113	0
Cnn2	-0.286647	0.0955491	4.58636	0	0.650648	0
Actr1a	-0.796242	0.382196	1.59248	0	0.649912	0
Golgb1	-1.56063	0.859942	2.42058	0	0.649262	0
Elk4	-0.222948	0.0955491	0.573294	0	0.648821	0
Hadha	-1.01919	0.414046	2.13393	0	0.648814	0
Celsr1	-2.70722	0	5.3826	0	0.648206	0
Rpl30	-2.03838	0.477745	5.86034	0	0.647768	0
Scrib	-4.42711	0	6.01959	0	0.647618	0
Atraid	-0.382196	0.191098	0.764393	0	0.647402	0
Fmr1	-2.22948	-0.159248	6.30624	0	0.647297	0
Glis2	-4.42711	0	5.86034	0	0.646919	0
Arl8b	-0.636994	0.286647	1.46509	0	0.646542	0
Kdsr	-0.414046	0.191098	0.828092	0	0.646291	0
Rab30	-1.33769	0.573294	2.32503	0	0.645458	0
Pnpla7	-1.49694	0.636994	2.10208	0	0.645207	0
Hmg20a	-1.40139	0.668844	2.42058	0	0.644624	0
D930020B18Rik	-4.17231	0.191098	3.82196	0	0.643962	0
Mrpl55	-0.636994	0.254798	1.62433	0	0.643907	0
Gemin7	-1.56063	0.700693	2.51613	0	0.643278	0
Rabif	-1.46509	0.732543	2.45243	0	0.642912	0
Ces1g	-0.477745	0.191098	1.01919	0	0.642677	0
Zfp811	-0.286647	0.0955491	1.33769	0	0.642112	0
Slc25a35	-1.49694	0.859942	2.70722	0	0.642037	0
Usp14	-1.71988	0.891791	2.29318	0	0.64189	0
Nufip1	-0.955491	0.191098	1.08289	0	0.641723	0
Zfp281	-0.445896	-0.0318497	5.54185	0	0.641341	0
Dcaf12l2	-0.254798	0.0955491	0.573294	0	0.64041	0
Tceal3	-1.65618	0.859942	2.54798	0	0.640118	0
Scrn1	-1.30584	0.509595	2.35688	0	0.640099	0
Jam2	-0.573294	0.254798	1.01919	0	0.639875	0
Gria2	-0.605144	0.286647	1.11474	0	0.63951	0
Acaa1b	-0.286647	0.0955491	0.732543	0	0.63864	0
Hspa13	-1.62433	0.923641	2.67537	0	0.638225	0
Htra1	-0.286647	0.127399	0.509595	0	0.638143	0
Rqcd1	-2.10208	0.573294	6.36994	0	0.637667	0
Uba2	-1.36954	0.891791	2.57982	0	0.637245	0
Nudcd3	-1.40139	0.700693	2.73907	0	0.636591	0
Snrpa1	-1.75173	0.923641	2.73907	0	0.636463	0
2810433D01Rik	-0.796242	0.286647	1.81543	0	0.636433	0
Las1l	-5.1278	0.222948	6.27439	0	0.636284	0
Csgalnact1	-1.43324	0.859942	2.35688	0	0.635693	0
Nr1h2	-1.56063	0.859942	2.57982	0	0.635658	0
Polr1d	-1.68803	0.955491	2.64352	0	0.634615	0
Pigs	-0.509595	0.254798	0.891791	0	0.63457	0
Chst11	-4.96855	0	5.3826	0	0.634029	0
Sema4b	-0.445896	0.222948	0.828092	0	0.633682	0
1700123O20Rik	-1.27399	0.414046	2.29318	0	0.63358	0
Sdhaf2	-1.52879	0.414046	7.03878	0	0.63344	0
Timp3	-0.477745	0.222948	0.732543	0	0.633088	0
Commd9	-1.52879	0.796242	2.54798	0	0.633049	0
Vash1	-4.58636	0.127399	5.1915	0	0.63287	0
Alpl	-1.21029	0.445896	2.03838	0	0.632664	0
Rnf7	-1.08289	0.382196	2.03838	0	0.631852	0
Camkk2	-1.94283	0.477745	5.0641	0	0.6318	0
Apod	-2.96202	4.96855	9.23641	0	0.630578	0
Fam181a	-5.4463	0.668844	2.86647	0	0.629639	0
Ap3s1	-1.49694	0.573294	2.26133	0	0.629541	0
Fam120aos	-0.98734	0.382196	1.56063	0	0.629461	0
Txndc5	-0.796242	0.318497	1.43324	0	0.62928	0
Pdpk1	-4.33156	0	5.51	0	0.629272	0
Smco1	-4.23601	0.222948	4.9367	0	0.628635	0
Angel2	-0.382196	0.191098	0.700693	0	0.62833	0
Psmc3ip	-0.191098	0.0318497	5.47815	0	0.627657	0
Dio2	-0.891791	0.382196	1.52879	0	0.627196	0
Mrps10	-1.68803	0.923641	2.77092	0	0.62676	0
Tmem231	-4.26786	0.0955491	5.28705	0	0.625307	0
Hdac1	-1.56063	0.445896	7.13433	0	0.624901	0
Paip2	-0.573294	0.222948	1.43324	0	0.624618	0
Gm14403	-2.16578	-0.191098	5.3826	0	0.623849	0
Bag1	-1.56063	0.764393	2.35688	0	0.623343	0
Slc2a4rg-ps	-3.43977	0.222948	1.14659	0	0.623118	0
Klf13	-0.350347	0.159248	0.636994	0	0.623054	0
Mrc2	-0.222948	0.0318497	0.636994	0	0.622925	0
Tifa	-1.33769	0.445896	2.80277	0	0.622747	0
Ptchd4	-0.222948	0.0636994	0.541445	0	0.622575	0
Bco2	-1.49694	0.573294	2.45243	0	0.622295	0
Il11ra1	-1.27399	0.414046	2.26133	0	0.622196	0
Rps15a-ps6	-1.33769	0.477745	3.94936	0	0.622177	0
Zbtb9	-0.700693	0.0636994	4.52266	0	0.621746	0
Cnot10	-1.75173	1.11474	2.48428	0	0.621708	0
B4galt6	-0.318497	0.159248	0.605144	0	0.621185	0
Txndc15	-0.764393	0.318497	1.05104	0	0.620435	0
H2-Q10	-0.350347	0.127399	1.11474	0	0.620298	0
5330426P16Rik	-4.71375	0.0318497	5.35075	0	0.619698	0
Hspa14	-1.49694	0.732543	2.61167	0	0.619451	0
Fam220a	-1.14659	0	7.00693	0	0.619204	0
Fst	-0.222948	0.0636994	0.668844	0	0.618849	0
E130309D02Rik	-5.0004	0.0318497	4.71375	0	0.617467	0
1500011B03Rik	-1.05104	0.477745	1.62433	0	0.617298	0
Coq5	-1.43324	0.700693	2.45243	0	0.616933	0
Fam171b	-0.605144	0.286647	1.05104	0	0.616549	0
Mrpl9	-0.859942	0.318497	1.46509	0	0.616479	0
Ltn1	-5.15965	0.254798	6.68844	0	0.615773	0
Itpk1	-5.3189	0.127399	5.98774	0	0.615435	0
Kif2a	-3.15312	0.636994	5.70109	0	0.615427	0
Ntrk2	-0.318497	0.159248	0.573294	0	0.614871	0
Tnfaip6	-1.97468	0.636994	6.24254	0	0.614842	0
Iah1	-5.03225	0.0318497	4.58636	0	0.614456	0
8430429K09Rik	-3.59902	1.52879	5.35075	0	0.614191	0
Cbx4	-4.9367	0.0318497	4.29971	0	0.614036	0
Fermt2	-0.509595	0.254798	0.955491	0	0.613585	0
Btbd17	-0.414046	0.191098	0.732543	0	0.61349	0
Cpt2	-1.56063	0.605144	2.45243	0	0.612774	0
Ifi27	-0.636994	0.286647	1.11474	0	0.61275	0
Hdac6	-4.90485	0	6.49734	0	0.612646	0
Gm6682	-0.700693	0.318497	1.56063	0	0.612497	0
Gm17644	-0.605144	0.254798	1.21029	0	0.609256	0
Scai	-0.573294	0	5.51	0	0.60835	0
Zfp358	-0.191098	-0.0318497	6.43364	0	0.608199	0
C030029H02Rik	-0.764393	0.286647	1.68803	0	0.608052	0
Flot1	-1.46509	0.636994	2.51613	0	0.608012	0
Blmh	-1.36954	0.541445	2.70722	0	0.60796	0
Lpar4	-2.93017	0.796242	4.7456	0	0.607388	0
Tmem129	-0.573294	0.222948	1.36954	0	0.606845	0
Arl16	-3.47162	0.318497	5.0004	0	0.606351	0
Ercc5	-5.1915	0.0955491	3.37607	0	0.605762	0
Zfp706	-0.636994	0.318497	1.08289	0	0.605727	0
Atrip	-4.17231	0.0318497	5.0641	0	0.604818	0
Rab1b	-0.509595	0.222948	1.01919	0	0.604717	0
D830005E20Rik	-1.43324	0.605144	3.75826	0	0.604638	0
Zcchc14	-4.96855	-0.0318497	4.55451	0	0.60414	0
Ube2d1	-3.94936	-0.0955491	6.24254	0	0.604111	0
Gm20187	-0.382196	0.127399	1.33769	0	0.604004	0
Ak3	-0.891791	0.382196	1.36954	0	0.603928	0
Camk1	-1.36954	0.573294	2.54798	0	0.603412	0
Pole4	-1.30584	0.414046	2.22948	0	0.602592	0
Gtf2a2	-2.32503	0.605144	2.80277	0	0.601932	0
Ubtf	-4.45896	0.191098	1.33769	0	0.601828	0
Eif4e3	-4.07676	0.127399	2.86647	0	0.601703	0
Gns	-0.955491	0.382196	1.49694	0	0.601372	0
Idh2	-0.573294	0.254798	1.05104	0	0.600586	0
Syt13	-0.382196	0.127399	1.43324	0	0.599519	0
Igf2bp1	-0.318497	0.127399	0.700693	0	0.599335	0
Prkdc	-1.78358	0.477745	6.49734	0	0.597451	0
Trim13	-5.03225	0	6.46549	0	0.597334	0
Pgm1	-4.04491	0.0955491	5.82849	0	0.596737	0
Serping1	-1.71988	0	6.01959	0	0.596723	0
Riok3	-2.16578	0.350347	2.61167	0	0.596361	0
Fkbp3	-0.541445	0.222948	1.05104	0	0.596062	0
Msrb2	-1.62433	0.764393	2.73907	0	0.59397	0
Gm10390	-0.254798	0.0636994	0.541445	0	0.593951	0
Mvb12b	-4.23601	0	5.86034	0	0.593803	0
Trub2	-4.49081	0	5.79664	0	0.592904	0
Stambpl1	-1.65618	0.764393	2.77092	0	0.592898	0
Fbln7	-0.191098	-0.0318497	1.21029	0	0.592442	0
Flrt2	-4.873	0	4.7456	0	0.592434	0
Unc5b	-0.222948	0.0636994	0.541445	0	0.592269	0
Apoc1	-2.51613	0	6.33809	0	0.59195	0
Supt7l	-3.40792	0.414046	4.42711	0	0.591011	0
Gm9696	-0.700693	0.159248	1.49694	0	0.590907	0
Zzz3	-0.222948	-0.0318497	5.66924	0	0.58918	0
Camta2	-4.36341	-0.159248	6.21069	0	0.589101	0
Inafm2	-2.03838	0.796242	2.61167	0	0.589041	0
Cpeb4	-0.796242	0.318497	1.40139	0	0.589009	0
Clta	-0.732543	0.286647	1.30584	0	0.588725	0
Fam227a	-0.350347	0.159248	0.668844	0	0.588521	0
Wdr61	-0.828092	0.318497	1.52879	0	0.587938	0
Ftx	-3.82196	0.254798	5.70109	0	0.587789	0
Pias1	-1.24214	0.445896	2.38873	0	0.587424	0
Noa1	-4.873	0	5.86034	0	0.587305	0
Mrps15	-1.62433	0.923641	2.48428	0	0.587024	0
Mettl11b	-4.90485	0.0318497	4.7456	0	0.586977	0
Phf10	-0.796242	0.0318497	4.42711	0	0.586893	0
Zbtb20	-0.796242	0.350347	1.24214	0	0.586218	0
Bcl2l1	-2.61167	0.286647	2.48428	0	0.586092	0
Atp5o	-0.414046	0.191098	0.796242	0	0.58507	0
Rabep1	-2.83462	0.859942	2.48428	0	0.584921	0
Pam	-0.350347	0.159248	0.636994	0	0.584699	0
Sec23ip	-0.573294	0.159248	4.84115	0	0.584477	0
Fbxo36	-1.49694	0.636994	2.48428	0	0.583817	0
Pcdh15	-0.636994	0.127399	1.49694	0	0.583654	0
Usp2	-0.668844	0.318497	1.17844	0	0.583396	0
Gpc5	-0.445896	0.191098	0.796242	0	0.583374	0
Asic2	-5.0004	0.0318497	4.873	0	0.582667	0
Nav1	-4.36341	0.0955491	5.1278	0	0.582634	0
Ttc30a2	-0.222948	0.0636994	0.541445	0	0.582173	0
Rffl	-3.24867	0	4.9367	0	0.581368	0
Sec22c	-0.636994	0.127399	0.764393	0	0.581279	0
Tank	-0.732543	0.254798	1.56063	0	0.579787	0
Ctnnbip1	-1.65618	0.318497	6.78398	0	0.57949	0
Fbrsl1	-1.14659	0.477745	1.62433	0	0.579234	0
Agk	-1.59248	0.668844	2.67537	0	0.579024	0
U2af1l4	-1.81543	0.732543	2.61167	0	0.57873	0
Hypk	-0.828092	0.286647	1.56063	0	0.578706	0
Zc2hc1a	-1.46509	0.477745	2.77092	0	0.577695	0
Tbl1xr1	-5.03225	-0.0636994	6.27439	0	0.577446	0
Gsg1l	-3.98121	0.0318497	4.10861	0	0.577361	0
Pou3f1	-0.382196	0.127399	1.24214	0	0.577326	0
Dpagt1	-1.56063	0.732543	2.51613	0	0.57688	0
Zc3h7a	-3.02572	0.318497	6.08329	0	0.574608	0
Tas1r3	-0.191098	0.0636994	0.477745	0	0.574396	0
Chd3	-4.49081	0	3.37607	0	0.574132	0
Ptbp1	-1.59248	0.541445	2.67537	0	0.573957	0
Rdh10	-4.20416	0.0318497	5.89219	0	0.573903	0
Hes1	-1.78358	0.445896	2.57982	0	0.573732	0
Zfp516	-0.318497	0.0636994	3.24867	0	0.573524	0
2610507B11Rik	-1.59248	0.668844	2.67537	0	0.573347	0
1700110I01Rik	-0.318497	0.0955491	0.668844	0	0.572512	0
Ubtd2	-0.700693	0.0318497	6.05144	0	0.572466	0
Zfhx3	-0.891791	0.382196	1.56063	0	0.572051	0
Rad51d	-4.14046	0.127399	5.2552	0	0.571415	0
Atxn7l3b	-0.414046	0.191098	0.796242	0	0.571415	0
Cnot2	-4.23601	-0.0318497	6.24254	0	0.571274	0
Ankrd29	-0.732543	0.318497	1.30584	0	0.570942	0
Bmi1	-4.8093	0.0318497	5.5737	0	0.570414	0
Naaa	-0.445896	0.191098	0.796242	0	0.569706	0
Cox14	-0.541445	0.222948	1.01919	0	0.569616	0
Srgap3	-1.59248	0.573294	2.42058	0	0.569481	0
Mpv17	-0.509595	0.222948	0.891791	0	0.569155	0
Dlx3	-0.254798	0.0636994	0.541445	0	0.569102	0
1700028D13Rik	-0.382196	0.127399	0.828092	0	0.567553	0
Atg5	-5.28705	0	6.81583	0	0.566315	0
Cnn3	-0.414046	0.159248	0.732543	0	0.566167	0
Stt3b	-0.573294	0.222948	0.98734	0	0.566036	0
Plscr3	-1.68803	0.191098	6.24254	0	0.565914	0
Gpatch8	-2.03838	0.732543	3.18497	0	0.565717	0
Trpc4ap	-1.43324	1.01919	2.19763	0	0.565619	0
Dkk2	-0.573294	0.127399	0.796242	0	0.564714	0
Fam199x	-3.47162	0.0955491	3.66271	0	0.563571	0
Leo1	-4.49081	0	5.66924	0	0.563524	0
Acot5	-0.382196	0.127399	0.98734	0	0.563168	0
Rps27l	-0.605144	0.254798	0.98734	0	0.563077	0
2610001J05Rik	-0.828092	0.286647	1.59248	0	0.563008	0
Adamts2	-0.923641	0.0318497	5.09595	0	0.562841	0
Tmc7	-1.49694	0.541445	2.22948	0	0.56249	0
Wnt4	-0.605144	0.222948	1.59248	0	0.562412	0
Tubg1	-1.46509	0.541445	2.70722	0	0.561908	0
Cyth3	-5.3826	0	6.46549	0	0.561429	0
Zfp710	-4.77745	-0.0318497	6.05144	0	0.560275	0
Adam28	-0.764393	0.286647	1.56063	0	0.560262	0
4921536K21Rik	-0.955491	0.222948	1.68803	0	0.559966	0
Hmgb1	-0.477745	0.191098	0.859942	0	0.559645	0
Ufm1	-2.32503	0.700693	2.64352	0	0.559497	0
Kcnj10	-1.24214	0.445896	1.40139	0	0.559475	0
Elof1	-1.14659	0.382196	2.10208	0	0.559327	0
Dnajc5	-1.59248	0.573294	2.48428	0	0.558714	0
Zfp87	-4.07676	0	5.79664	0	0.558456	0
Epdr1	-0.573294	0.222948	0.98734	0	0.558399	0
5430440P10Rik	-0.318497	0.0955491	0.636994	0	0.558301	0
Aatf	-5.0641	0	5.51	0	0.557918	0
Slc16a1	-1.59248	0.477745	2.19763	0	0.557526	0
Mpi	-2.99387	-0.0318497	6.05144	0	0.557271	0
Ssfa2	-4.65005	0.796242	2.54798	0	0.556985	0
Musk	-0.350347	0.159248	0.605144	0	0.556891	0
Rab4b	-1.05104	0.382196	1.56063	0	0.556629	0
Polr2i	-1.05104	0.318497	2.26133	0	0.555539	0
Cacul1	-4.04491	0	1.24214	0	0.555452	0
Klhl7	-0.668844	0.222948	1.21029	0	0.555374	0
Med1	-2.13393	0.445896	3.21682	0	0.555327	0
Mmrn2	-0.636994	0.254798	1.30584	0	0.555054	0
Stx12	-1.52879	0.668844	2.35688	0	0.553395	0
Orc4	-0.796242	0.318497	1.21029	0	0.553071	0
Sord	-1.78358	0.509595	2.57982	0	0.552808	0
Vti1a	-1.43324	0.445896	2.61167	0	0.552443	0
2810468N07Rik	-5.41445	0.0636994	6.27439	0	0.552112	0
Ufc1	-1.30584	0.445896	2.10208	0	0.552091	0
Dalrd3	-1.65618	0.98734	2.26133	0	0.551786	0
Triobp	-5.0641	0	5.92404	0	0.551599	0
Ece1	-0.859942	0.414046	1.30584	0	0.551422	0
Slc39a9	-5.51	0.0318497	6.94323	0	0.551258	0
Stk38	-1.43324	0.445896	2.07023	0	0.550351	0
Cript	-0.859942	0.254798	1.68803	0	0.549912	0
Ccdc85b	-0.509595	0.191098	0.859942	0	0.54987	0
Sec61g	-0.573294	0.222948	0.923641	0	0.549799	0
Trappc8	-4.7456	0	5.5737	0	0.547834	0
Tug1	-0.382196	0.159248	0.668844	0	0.546678	0
Slc38a10	-5.03225	0.0636994	6.11514	0	0.546249	0
0610011F06Rik	-1.40139	0.477745	2.29318	0	0.546199	0
Mettl3	-1.40139	0.191098	6.05144	0	0.546181	0
Rrp1	-1.30584	0.318497	2.35688	0	0.544843	0
Nr4a1	-0.191098	0.0318497	5.60555	0	0.543598	0
P2rx3	-0.414046	0	2.93017	0	0.542405	0
Gm16386	-2.19763	-0.0318497	5.0004	0	0.541671	0
Trip4	-0.382196	0.159248	0.668844	0	0.541615	0
Coro2b	-1.71988	1.01919	2.51613	0	0.540907	0
Ncs1	-4.14046	5.89219	6.17884	0	0.540376	0
Sp4	-4.01306	0	5.5737	0	0.540213	0
Snrnp25	-5.0641	0.0318497	4.45896	0	0.539787	0
Fam65a	-0.254798	0	6.24254	0	0.539521	0
Trappc3	-1.43324	0.382196	2.19763	0	0.539224	0
Tufm	-1.30584	0.382196	2.35688	0	0.538146	0
Ppip5k2	-0.254798	0	5.86034	0	0.537815	0
Dhx15	-1.97468	0.923641	2.89832	0	0.537803	0
Opa1	-1.65618	0.541445	2.57982	0	0.537796	0
Mok	-5.0641	0.0318497	4.17231	0	0.537555	0
Cep70	-4.96855	0	4.04491	0	0.537128	0
Tsr2	-1.78358	0.222948	6.14699	0	0.536877	0
Iqsec1	-0.382196	0.159248	0.668844	0	0.536288	0
Mtmr6	-5.1278	-0.0636994	6.68844	0	0.535658	0
Rpp38	-5.15965	0.0636994	4.58636	0	0.535128	0
Lgals8	-1.84728	0.859942	2.70722	0	0.535074	0
Slc35b4	-5.0641	-0.0318497	6.11514	0	0.534285	0
Ptpn1	-3.85381	0	5.4463	0	0.533978	0
Edn1	-0.191098	0.0318497	0.509595	0	0.532733	0
Zyg11b	-0.445896	0.0955491	4.96855	0	0.532089	0
Cd164	-0.445896	0.191098	0.732543	0	0.532044	0
Mospd3	-1.65618	0.541445	2.70722	0	0.531587	0
Gnpat	-1.36954	0.318497	2.10208	0	0.531281	0
Cdh10	-0.923641	0.254798	1.84728	0	0.530761	0
Gjb6	-0.477745	0.159248	0.955491	0	0.530689	0
Map2k2	-1.08289	0.318497	1.94283	0	0.53037	0
Thumpd2	-4.58636	0	6.17884	0	0.529301	0
Styk1	-0.286647	0.0636994	0.605144	0	0.529196	0
Tmem135	-1.75173	0.636994	2.48428	0	0.529021	0
Fam195b	-0.668844	0.222948	1.17844	0	0.5287	0
Eepd1	-0.191098	0.0318497	5.70109	0	0.527708	0
Cstf2t	-1.71988	0.382196	2.67537	0	0.527621	0
Hipk3	-0.191098	0	5.2552	0	0.527089	0
Kpna2	-1.65618	0.605144	2.38873	0	0.52686	0
Gdpd1	-1.56063	0.636994	2.35688	0	0.526218	0
Ythdf2	-0.382196	0.159248	0.668844	0	0.525983	0
Phrf1	-4.90485	0.0636994	0.636994	0	0.525137	0
Gemin2	-0.222948	-0.0318497	6.43364	0	0.524635	0
Tns4	-1.27399	0.127399	2.57982	0	0.52459	0
Wasl	-1.91098	0.541445	3.05757	0	0.52447	0
Rnf6	-5.1278	-0.0636994	6.52919	0	0.524362	0
Prr5l	-0.732543	0.0955491	2.51613	0	0.523684	0
1700007J10Rik	-0.923641	0.254798	4.20416	0	0.522716	0
Zfp160	-4.58636	0.0318497	5.79664	0	0.521399	0
Eif4a2	-0.605144	0.222948	0.923641	0	0.521324	0
Zfp213	-0.191098	0	6.01959	0	0.520326	0
Hist1h4k	-0.541445	0	3.56717	0	0.51962	0
Txndc12	-0.764393	0.254798	1.24214	0	0.519414	0
Gabpa	-3.24867	0.477745	6.27439	0	0.519411	0
Parp12	-5.1915	0	6.33809	0	0.519203	0
Slc25a23	-2.16578	1.05104	2.73907	0	0.518816	0
Acox1	-0.636994	0.222948	1.08289	0	0.517977	0
Foxk2	-5.09595	0.0636994	6.21069	0	0.517913	0
Abcb9	-0.859942	0.222948	1.87913	0	0.517619	0
Metrn	-1.11474	0.382196	1.46509	0	0.517411	0
Rnpepl1	-1.62433	0.222948	6.33809	0	0.516548	0
Psmg2	-1.68803	0.477745	2.45243	0	0.516126	0
Apobec1	-3.91751	0.159248	2.48428	0	0.51606	0
Cnp	-0.796242	0.286647	1.24214	0	0.515961	0
Cts8	-0.605144	0.127399	1.78358	0	0.515794	0
St3gal1	-0.254798	0.0636994	0.636994	0	0.515725	0
Pcdh10	-0.636994	0.222948	1.01919	0	0.515693	0
Ar	-0.700693	0.127399	1.40139	0	0.515614	0
Ucp3	-5.0641	0.923641	6.05144	0	0.515356	0
Hspd1	-0.923641	0.254798	1.81543	0	0.515289	0
Gpld1	-0.605144	0.222948	0.955491	0	0.515143	0
Vsig10l	-0.254798	0.0318497	5.51	0	0.514714	0
Sema4g	-4.9367	0.318497	5.89219	0	0.514411	0
Acvr1c	-4.49081	0.0955491	0.605144	0	0.514356	0
Erap1	-5.3189	0.0318497	6.27439	0	0.513832	0
C030006K11Rik	-2.16578	0.0955491	6.21069	0	0.513537	0
Desi2	-5.03225	0.98734	5.66924	0	0.513311	0
9030617O03Rik	-5.0004	-0.0318497	6.01959	0	0.513141	0
Lhfp	-1.65618	0.764393	2.51613	0	0.512997	0
Skap2	-1.56063	0.636994	2.54798	0	0.512563	0
Gyk	-0.891791	0.318497	1.33769	0	0.512126	0
Tnk1	-0.318497	0.0955491	0.636994	0	0.511761	0
Stx5a	-1.68803	0.828092	2.26133	0	0.511574	0
Fer	-3.85381	0	6.21069	0	0.510958	0
Caln1	-0.286647	0.0636994	0.573294	0	0.510055	0
Gm10408	-2.54798	1.05104	2.64352	0	0.509368	0
Rad50	-1.24214	0.0636994	5.41445	0	0.509267	0
Aldoa	-0.350347	0.127399	0.541445	0	0.508581	0
P4ha1	-0.477745	0.191098	0.828092	0	0.508272	0
Ly86	-0.414046	0.0955491	0.700693	0	0.507904	0
Atg16l1	-4.17231	0	6.05144	0	0.507694	0
Slfn9	-1.71988	0.159248	3.15312	0	0.507252	0
Cfdp1	-1.78358	0.732543	2.64352	0	0.506501	0
Snhg5	-1.84728	0.796242	2.77092	0	0.506403	0
Vps26a	-1.68803	0.254798	6.81583	0	0.506238	0
Mmd2	-0.318497	0.127399	0.509595	0	0.505882	0
Akt2	-0.636994	0.222948	1.05104	0	0.505181	0
Jun	-4.84115	0.254798	6.05144	0	0.503805	0
Zc3h6	-4.61821	0.0636994	5.92404	0	0.502955	0
Mapre1	-0.796242	0.318497	1.21029	0	0.502504	0
Fam49b	-1.27399	0.350347	2.00653	0	0.502451	0
Srek1	-2.13393	0.541445	5.82849	0	0.502245	0
Mmp24	-0.286647	0.0318497	0.828092	0	0.501897	0
Gskip	-1.71988	0.636994	3.24867	0	0.501014	0
Spsb1	-4.10861	0	5.28705	0	0.500666	0
Rsrc1	-1.87913	0.828092	2.45243	0	0.500423	0
Igsf11	-0.414046	0.159248	0.700693	0	0.500006	0
Prr14l	-4.58636	0	6.01959	0	0.499974	0
2810002D19Rik	-5.3189	0.0318497	5.51	0	0.499937	0
Srrt	-1.46509	0	6.08329	0	0.49964	0
Plod3	-1.62433	0.286647	2.80277	0	0.49939	0
Rbck1	-1.30584	0.318497	2.67537	0	0.499164	0
Fut10	-5.54185	0	6.59289	0	0.498681	0
Adar	-4.36341	0	5.76479	0	0.4984	0
Cdh2	-0.541445	0.191098	0.859942	0	0.497873	0
Fbxo28	-1.33769	0.382196	2.42058	0	0.497433	0
Dnase2a	-4.04491	0	4.6819	0	0.497273	0
Macf1	-0.573294	0.191098	0.923641	0	0.497163	0
Pros1	-1.59248	0.477745	2.61167	0	0.496966	0
Nphp1	-3.75826	0	5.73294	0	0.49643	0
Nr2c2	-5.03225	0.127399	0.732543	0	0.496404	0
Fam76a	-1.43324	0.477745	2.42058	0	0.496401	0
Manea	-1.43324	0.477745	1.78358	0	0.496198	0
Araf	-0.477745	0.191098	0.796242	0	0.495815	0
Hiatl1	-1.40139	0.382196	1.94283	0	0.495709	0
Kansl2	-1.33769	0.414046	1.81543	0	0.495696	0
Scaper	-4.77745	0	5.82849	0	0.495217	0
Tfpt	-1.78358	0.764393	2.54798	0	0.494093	0
Slc4a4	-0.668844	0.222948	1.05104	0	0.493777	0
Setx	-4.96855	0.0955491	5.3826	0	0.493384	0
Tbcb	-0.668844	0.222948	1.24214	0	0.492851	0
Hipk1	-4.42711	0.286647	5.3826	0	0.49238	0
Smarcc2	-1.30584	0.318497	2.26133	0	0.491916	0
Acp6	-1.68803	0.509595	3.21682	0	0.491634	0
Dnaja4	-5.3826	-0.159248	6.97508	0	0.491607	0
Polr2a	-4.90485	0.191098	5.6374	0	0.491142	0
Khsrp	-0.541445	0.191098	0.828092	0	0.490769	0
Mafg	-4.71375	0	3.50347	0	0.49071	0
Dhx37	-0.668844	0.222948	1.24214	0	0.490554	0
Nkd1	-4.77745	0.222948	6.24254	0	0.490534	0
D830030K20Rik	-1.11474	0.350347	2.19763	0	0.49031	0
Stard8	-4.04491	0	0.891791	0	0.490162	0
Slc35f6	-0.923641	0.254798	1.33769	0	0.490069	0
Zbtb18	-4.61821	0.254798	2.96202	0	0.48995	0
Cpsf2	-5.0641	0.0636994	0.573294	0	0.48941	0
Ccdc125	-0.764393	0.254798	1.43324	0	0.489249	0
Ybx1	-0.700693	0.254798	1.01919	0	0.488993	0
Snord42a	-1.24214	0.382196	2.19763	0	0.488963	0
Zfp511	-1.68803	0.509595	2.48428	0	0.487886	0
Ppp1cc	-1.84728	0.98734	2.51613	0	0.487111	0
Ifnar2	-1.59248	0.509595	2.77092	0	0.486802	0
Evi5	-1.71988	0.668844	2.22948	0	0.486173	0
Ap3d1	-1.59248	0.445896	2.03838	0	0.486141	0
Gm561	-2.22948	0.573294	2.61167	0	0.485626	0
9330133O14Rik	-5.03225	0.127399	5.60555	0	0.484787	0
Smarcb1	-0.732543	0.222948	1.24214	0	0.484729	0
Lasp1	-1.71988	0.700693	2.19763	0	0.484206	0
Idnk	-1.78358	0.605144	2.45243	0	0.483568	0
Vps37b	-3.85381	0	6.46549	0	0.483204	0
Ppp3ca	-0.796242	0.286647	1.27399	0	0.482893	0
Blcap	-0.955491	0.191098	1.87913	0	0.482819	0
Slc38a3	-0.445896	0.159248	0.732543	0	0.482799	0
Hyi	-5.03225	0	5.79664	0	0.482511	0
Fam131a	-4.96855	-0.0318497	1.78358	0	0.482211	0
Als2	-0.477745	0.159248	4.33156	0	0.48177	0
Eftud1	-4.8093	0	4.90485	0	0.481193	0
Ankrd17	-1.71988	0.605144	2.61167	0	0.481124	0
Gca	-1.24214	0.382196	1.94283	0	0.480671	0
Ambra1	-4.65005	0	5.70109	0	0.480604	0
Usp15	-4.55451	0.541445	3.08942	0	0.480485	0
Spsb2	-3.66271	0	6.08329	0	0.480398	0
Baalc	-2.42058	0.541445	2.99387	0	0.480125	0
Huwe1	-1.24214	0.350347	1.91098	0	0.479672	0
Nop2	-3.53532	0	5.4463	0	0.479543	0
Acvr1b	-2.45243	0.0636994	1.14659	0	0.479484	0
Mtpn	-0.923641	0.286647	1.36954	0	0.479263	0
Lrfn3	-0.286647	0	5.28705	0	0.479014	0
Vgll4	-5.28705	0.159248	6.01959	0	0.47887	0
Smad1	-4.52266	0	2.67537	0	0.47851	0
Slc25a22	-5.1915	0.0318497	6.14699	0	0.478112	0
F11r	-0.286647	0.0636994	0.573294	0	0.477614	0
Phkg1	-0.732543	0.222948	1.24214	0	0.477517	0
Bola3	-1.01919	0.286647	1.65618	0	0.477103	0
Ubfd1	-2.38873	0.636994	2.61167	0	0.476895	0
Eif3d	-1.71988	0.668844	2.48428	0	0.476883	0
Gas6	-1.84728	0.636994	2.13393	0	0.476455	0
Rnf26	-5.28705	0.159248	6.24254	0	0.475862	0
Sp9	-0.445896	0.127399	0.923641	0	0.475777	0
Depdc5	-2.80277	-0.254798	5.3189	0	0.47449	0
Lta4h	-1.94283	0.923641	2.48428	0	0.474241	0
Ap1g1	-4.20416	0.0318497	4.42711	0	0.474139	0
Vps36	-5.03225	0	6.17884	0	0.473179	0
Ndrg3	-1.21029	0.318497	1.91098	0	0.47311	0
Selm	-0.828092	0.254798	1.21029	0	0.471801	0
Park7	-0.605144	0.191098	0.923641	0	0.471754	0
Rrp8	-5.3189	0.477745	6.05144	0	0.471352	0
Bex1	-0.382196	0.0636994	2.77092	0	0.470801	0
Hist1h4m	-5.03225	0	3.88566	0	0.470724	0
Caskin2	-2.19763	0.668844	2.29318	0	0.470515	0
Mrps18c	-0.732543	0.222948	1.21029	0	0.468766	0
Gpam	-0.764393	0.222948	1.14659	0	0.468457	0
Adora2b	-1.05104	0.286647	1.49694	0	0.468313	0
Ank	-1.81543	0.636994	2.19763	0	0.46818	0
Gm6981	-0.700693	0.222948	1.36954	0	0.467712	0
Gm16023	-0.573294	0.0636994	3.24867	0	0.466916	0
Maf1	-1.08289	0.318497	1.81543	0	0.466816	0
Slc25a46	-0.923641	0.254798	1.62433	0	0.466528	0
Vamp3	-5.95589	0.700693	2.38873	0	0.466148	0
[truncated: 8,334 more rows]

## Sheet: Striatum_GroundStateVsPreDiv
	lb (lower bound for expression-fold change)	mle (maximum likelihood estimate for expression-fold change)	ub (upper bound for expression-fold change)	ce (conservative estimate for expression-fold change)	Z (uncorrected Z score of expression difference)	cZ (expression difference Z-score corrected for multiple hypothesis testing using Holm procedure)
5031426D15Rik	2.39223	2.95881	3.49392	2.39223	7.16081	6.1806		Higher in ground-state striatum
Galntl6	2.51814	3.05324	3.55687	2.51814	7.16081	6.1806
Map3k1	1.19612	1.54236	1.8886	1.19612	7.16081	6.1806
Rapgef4	2.10894	2.73848	3.30506	2.10894	7.16081	6.1806
Tbata	3.1162	3.71425	4.28083	3.1162	7.16081	6.1806
Paip1	2.14042	2.707	3.21063	2.14042	7.16081	6.1806
Comt	1.85713	2.36075	2.89586	1.85713	7.16081	6.1806
B630005N14Rik	1.7627	2.36075	2.95881	1.7627	7.16081	6.1806
Prr15	1.63679	2.17189	2.67552	1.63679	7.16081	6.1806
Mrgpra6	0.849872	1.22759	1.57384	0.849872	7.16081	6.1806
Cldn19	2.14042	6.51568	7.17669	2.14042	7.16081	6.1806
Lrp4	1.60531	2.14042	2.64404	1.60531	7.16079	6.1806
Fhl3	1.69974	2.26632	2.80143	1.69974	7.16077	6.1806
5830416I19Rik	1.69974	2.32928	2.92734	1.69974	7.16017	6.1806
Dnm3os	4.91037	5.72876	6.38978	4.91037	7.11735	6.14221
Hist1h2af	4.94185	5.72876	6.32682	4.94185	7.10388	6.13923
Cbx3	1.19612	1.66827	2.10894	1.19612	7.09748	6.13923
AI593442	1.47941	2.04599	2.61257	1.47941	7.0797	6.13135
Hsf2	1.3535	1.8886	2.39223	1.3535	7.07521	6.13135
Plau	1.7627	5.85467	6.45273	1.7627	7.00101	6.05436
Gm5766	4.94185	5.72876	6.32682	4.94185	6.93292	5.98394
Prtg	1.66827	5.79172	6.61011	1.66827	6.89626	5.94979
Gm10745	4.81594	5.5399	6.13796	4.81594	6.89035	5.94979
Ppm1h	4.69003	5.63433	6.45273	4.69003	6.83755	5.90046
Slx1b	1.32202	1.8886	2.39223	1.32202	6.83557	5.90046
Dusp23	1.19612	1.73122	2.20337	1.19612	6.8079	5.87509
9030612E09Rik	1.25907	1.82565	2.32928	1.25907	6.71478	5.77403
Hoxb1	4.81594	5.50843	6.10648	4.81594	6.68471	5.74544
Prkg2	4.69003	5.44547	6.04353	4.69003	6.65945	5.7222
Cask	1.25907	1.8886	2.51814	1.25907	6.62893	5.69269
Ogfrl1	1.3535	1.98303	2.58109	1.3535	6.54596	5.60226
Lrrc8a	0.944302	1.38498	1.82565	0.944302	6.42749	5.4701
4930546K05Rik	4.62708	5.44547	6.10648	4.62708	6.42218	5.46936
Nfia	1.07021	1.60531	2.10894	1.07021	6.38686	5.43351
Wbscr25	4.5956	5.60286	6.23239	4.5956	6.23972	5.27179
Map1b	4.56413	5.414	6.07501	4.56413	6.19285	5.22182
Exoc8	1.10169	1.66827	2.20337	1.10169	6.09678	5.11365
Zfp937	1.00726	1.51088	1.98303	1.00726	6.05346	5.06739
Thg1l	1.25907	5.5399	6.16944	1.25907	6.02883	5.04308
Atxn1	1.03873	1.51088	6.07501	1.03873	5.76115	4.7286
Mc1r	0.912825	1.41645	5.60286	0.912825	5.66395	4.61623
Kcnq1ot1	0.912825	1.44793	1.95156	0.912825	5.56942	4.50636
Syne2	0.881348	1.38498	1.85713	0.881348	5.55646	4.49546
Mrpl19	0.912825	1.44793	1.98303	0.912825	5.45837	4.38037
Col4a3	1.10169	5.31957	6.04353	1.10169	5.33919	4.24316
Map1a	0.975778	5.35104	5.98058	0.975778	5.33043	4.23704
Ahdc1	0.849872	1.38498	1.92008	0.849872	5.2676	4.16382
Lrtm1	0.849872	1.3535	5.76024	0.849872	5.22764	4.11873
Rbm45	0.818395	1.3535	1.85713	0.818395	5.21655	4.10947
Tmprss13	0.881348	1.3535	5.9491	0.881348	5.13142	4.01203
Tfap2a	0.849872	1.38498	1.92008	0.849872	5.11329	3.99371
Inpp4a	0.818395	1.38498	1.8886	0.818395	5.08348	3.96062
Cdkn2aip	0.786918	1.29055	5.66581	0.786918	5.05102	3.92832
Gna11	0.818395	1.38498	1.95156	0.818395	5.02862	3.90428
Nipal1	0.786918	1.29055	5.72876	0.786918	4.98929	3.86691
Rcn1	3.87164	5.25661	6.79897	3.87164	4.97232	3.85335
Igf2bp2	0.786918	1.32202	1.82565	0.786918	4.95042	3.82955
Alg11	0.755441	1.25907	1.7627	0.755441	4.89896	3.77197
Supt16	0.755441	1.29055	1.82565	0.755441	4.87121	3.74047
Gata3	4.75299	5.57138	6.23239	4.75299	4.82252	3.68585
Tmem87a	0.755441	1.29055	1.82565	0.755441	4.81761	3.68377
Deptor	3.58835	5.47695	6.23239	3.58835	4.7845	3.66316
Zbtb44	0.692488	1.22759	1.73122	0.692488	4.78018	3.66316
Txnl4b	0.755441	1.29055	1.82565	0.755441	4.72816	3.60971
Wtap	0.723965	1.32202	1.8886	0.723965	4.69982	3.5851
Slc5a3	0.881348	5.09923	5.85467	0.881348	4.68567	3.57678
Musk	4.31231	5.06775	5.69729	4.31231	4.66182	3.55621
Cisd3	0.755441	1.38498	1.95156	0.755441	4.64074	3.53927
Zfp444	0.692488	1.22759	1.73122	0.692488	4.61482	3.5116
Zfp120	0.786918	5.06775	5.82319	0.786918	4.60295	3.4991
C330006A16Rik	0.661011	1.19612	1.73122	0.661011	4.5868	3.48639
Jph3	0.629534	1.16464	1.63679	0.629534	4.55089	3.44814
Acnat1	0.661011	1.19612	1.69974	0.661011	4.4994	3.39705
Snrk	0.723965	1.3535	2.01451	0.723965	4.46512	3.35532
Picalm	0.849872	1.38498	5.98058	0.849872	4.45121	3.34043
Klhl31	0.629534	1.16464	1.66827	0.629534	4.4498	3.34043
E330033B04Rik	0.598058	1.10169	1.60531	0.598058	4.40402	3.28577
Fndc5	0.629534	1.19612	1.73122	0.629534	4.33721	3.20368
Bdnf	0.849872	4.97332	5.72876	0.849872	4.30076	3.16547
Slfn5	0.598058	1.13316	1.63679	0.598058	4.30071	3.16547
Nuak2	4.28083	5.13071	5.79172	4.28083	4.28067	3.14389
Pdp2	0.661011	1.22759	1.79417	0.661011	4.27325	3.13648
Cep97	0.629534	1.22759	1.82565	0.629534	4.23392	3.09163
Sod3	2.2978	7.99509	8.56167	2.2978	4.21443	3.06817
Cdv3	0.598058	1.13316	1.66827	0.598058	4.20081	3.05244
Ncoa3	0.629534	1.19612	1.82565	0.629534	4.18856	3.03849
Mybl1	0.912825	5.09923	5.69729	0.912825	4.16639	3.01282
Atg7	0.661011	1.29055	5.19366	0.661011	4.15048	2.99698
4930529C04Rik	0.535104	1.03873	1.54236	0.535104	4.08884	2.92356
Gnb1	0.598058	1.22759	1.82565	0.598058	4.03877	2.86287
Klf13	0.503628	1.03873	1.57384	0.503628	3.95721	2.76099
Tsku	0.535104	1.07021	1.60531	0.535104	3.95167	2.75787
Synj2bp	0.472151	1.00726	1.47941	0.472151	3.94159	2.74849
Wdfy1	0.503628	1.03873	1.54236	0.503628	3.93571	2.74263
Cap1	0.535104	1.13316	1.69974	0.535104	3.91868	2.72364
B4galt6	0.472151	1.00726	1.51088	0.472151	3.8644	2.65545
Igf2bp3	0.472151	1.00726	1.47941	0.472151	3.85581	2.64573
Ano6	0.503628	1.03873	1.57384	0.503628	3.84365	2.63106
Tmppe	0.472151	1.00726	1.51088	0.472151	3.84206	2.63099
Ptchd1	0.440674	0.975778	1.47941	0.440674	3.8349	2.62321
Chrm4	4.5956	5.57138	6.23239	4.5956	3.81812	2.60566
Ctbp2	0.503628	0.975778	5.414	0.503628	3.81616	2.60566
Frat1	0.692488	4.94185	5.5399	0.692488	3.7824	2.56285
Dpf1	0.440674	0.975778	1.44793	0.440674	3.76855	2.54976
Arpc1b	0.472151	1.00726	1.54236	0.472151	3.73974	2.51923
Adam22	0.472151	0.944302	5.47695	0.472151	3.73127	2.51105
Spry2	0.440674	0.975778	1.44793	0.440674	3.72905	2.51074
Wrb	0.566581	1.22759	1.8886	0.566581	3.71199	2.49078
Pdzd8	0.472151	1.00726	1.85713	0.472151	3.69836	2.47361
Syndig1l	0.409197	0.944302	1.41645	0.409197	3.66962	2.43703
BC024978	4.02902	4.91037	5.63433	4.02902	3.66543	2.43309
Hjurp	0.629534	4.87889	5.5399	0.629534	3.64761	2.4118
Sik1	0.440674	1.00726	1.54236	0.440674	3.642	2.4058
Fgf12	0.472151	1.00726	5.19366	0.472151	3.59082	2.34066
Cplx2	0.472151	0.912825	5.38252	0.472151	3.58344	2.33206
Abcg1	4.43822	5.28809	5.91762	4.43822	3.51886	2.25063
Igtp	3.14767	5.88615	8.02656	3.14767	3.49868	2.22714
Fam227a	0.503628	4.81594	5.47695	0.503628	3.47714	2.20058
Ptprd	0.440674	1.00726	4.94185	0.440674	3.47649	2.20058
Bean1	1.51088	5.44547	6.07501	1.51088	3.45637	2.17498
Pi4kb	0.409197	1.00726	1.66827	0.409197	3.44862	2.16553
Zfp266	0.377721	0.944302	1.47941	0.377721	3.43735	2.15087
4930463O16Rik	0.849872	1.57384	2.51814	0.849872	3.39944	2.09867
Pam	0.346244	0.881348	1.3535	0.346244	3.38362	2.07902
Zfp385b	0.818395	5.98058	6.3583	0.818395	3.34809	2.03361
Pdcd4	0.346244	0.912825	1.44793	0.346244	3.30362	1.9781
Tceanc2	0.314767	0.849872	1.3535	0.314767	3.28751	1.96131
Rbm47	1.25907	6.23239	6.64159	1.25907	3.28402	1.9579
Sgms1	3.96607	5.82319	7.42851	3.96607	3.26404	1.93506
Kif3a	0.377721	0.975778	1.54236	0.377721	3.24328	1.90897
Vmn2r29	2.67552	4.94185	6.70454	2.67552	3.24191	1.90874
Zbtb21	0.377721	0.975778	5.16218	0.377721	3.23188	1.90262
Cnnm4	0.566581	4.43822	5.60286	0.566581	3.2191	1.89173
Camk4	0.314767	0.818395	1.29055	0.314767	3.21884	1.89173
Strbp	0.346244	0.912825	3.87164	0.346244	3.20866	1.87793
Eno1b	0.409197	1.07021	1.69974	0.409197	3.17571	1.83073
Hip1	1.95156	5.9491	7.55441	1.95156	3.1738	1.82958
Vit	3.33653	6.29534	7.23965	3.33653	3.16267	1.81775
AI450353	0.377721	0.975778	4.87889	0.377721	3.156	1.81277
Tmem243	0.314767	0.881348	1.41645	0.314767	3.14941	1.80609
Zfp26	3.74573	4.87889	5.69729	3.74573	3.14407	1.79957
Mief2	0.346244	0.944302	4.91037	0.346244	3.1224	1.77635
Tug1	0.314767	0.881348	1.44793	0.314767	3.10051	1.74559
Usp37	0.314767	0.944302	1.51088	0.314767	3.08722	1.72819
Zmat2	0.314767	0.912825	1.47941	0.314767	3.07463	1.71356
Rad51c	0.818395	1.69974	6.16944	0.818395	3.07116	1.70983
Uroc1	0.755441	5.88615	6.29534	0.755441	3.04824	1.68219
Phactr2	0.283291	0.849872	1.38498	0.283291	3.02542	1.65617
Rpgrip1	0.346244	0.912825	5.22514	0.346244	3.02303	1.65407
Ank3	0.723965	5.98058	6.3583	0.723965	3.01903	1.64939
Ctcfl	0.283291	4.81594	5.31957	0.283291	3.01534	1.64689
Ppp1r16b	0.251814	0.818395	1.3535	0.251814	2.98802	1.61778
Ado	0.251814	0.818395	1.3535	0.251814	2.98293	1.61575
Gm7337	0.314767	4.72151	5.28809	0.314767	2.98233	1.61575
Usp26	0.692488	5.98058	6.3583	0.692488	2.97882	1.61339
Gm13375	0.251814	0.755441	5.13071	0.251814	2.95369	1.57785
Hyou1	0.251814	0.755441	5.09923	0.251814	2.93814	1.56248
App	1.16464	5.63433	7.01931	1.16464	2.92842	1.55318
Gas7	0.251814	0.786918	1.32202	0.251814	2.90676	1.52276
tdTomato	0.220337	0.755441	1.29055	0.220337	2.89319	1.51337
E530011L22Rik	0.409197	0.881348	5.31957	0.409197	2.88387	1.50129
D17H6S53E	0.220337	0.755441	1.25907	0.220337	2.84729	1.46279
Shank1	0.220337	0.723965	4.72151	0.220337	2.84418	1.46095
Znrf3	0.220337	0.786918	1.32202	0.220337	2.84201	1.4589
Lurap1	2.07746	5.91762	6.79897	2.07746	2.84068	1.45875
Srcap	1.19612	5.9491	6.42125	1.19612	2.82705	1.44635
Bhlhe41	0.220337	0.818395	1.38498	0.220337	2.82424	1.4457
Myef2	0.251814	0.849872	4.31231	0.251814	2.82282	1.4457
Rspry1	2.45518	5.44547	6.79897	2.45518	2.80183	1.4225
Lrig1	1.3535	5.69729	7.45998	1.3535	2.75784	1.37971
Pou4f1	0.723965	1.54236	2.42371	0.723965	2.75668	1.37919
Npm3-ps1	0.472151	5.31957	5.9491	0.472151	2.73181	1.3525
Rap2b	0.220337	0.849872	1.41645	0.220337	2.73121	1.3525
Ide	0.377721	1.22759	2.23485	0.377721	2.72256	1.34505
Kdm6b	0.220337	0.849872	1.47941	0.220337	2.71683	1.34312
D630003M21Rik	0.220337	0.818395	3.71425	0.220337	2.68594	1.31145
Mirc35hg	0.566581	5.19366	5.91762	0.566581	2.67484	1.30272
Peg13	1.63679	6.10648	7.14522	1.63679	2.61197	1.23672
Tmem126b	0.944302	6.51568	7.52294	0.944302	2.60241	1.22671
Cd59a	0.472151	1.44793	2.32928	0.472151	2.60119	1.22588
Trim11	0.944302	5.9491	7.27112	0.944302	2.58832	1.21755
Vash1	0.440674	5.38252	6.07501	0.440674	2.57488	1.20431
Unc5c	0.503628	1.57384	4.69003	0.503628	2.56428	1.20406
Whsc1l1	0.18886	0.786918	4.81594	0.18886	2.56279	1.20406
Bard1	0.283291	1.25907	2.39223	0.283291	2.55419	1.19639
Dcaf6	0.125907	0.661011	1.16464	0.125907	2.54176	1.18581
Nob1	1.10169	5.38252	7.11374	1.10169	2.53291	1.17848
Lrrtm4	0.346244	1.3535	2.51814	0.346244	2.52957	1.17391
Tbck	0.157384	0.723965	1.32202	0.157384	2.52878	1.17391
Dnaja4	0.755441	5.63433	7.58589	0.755441	2.51612	1.16108
Dst	0.157384	0.849872	1.51088	0.157384	2.51136	1.15517
Spc24	0.283291	4.81594	5.414	0.283291	2.4827	1.13142
Phospho2	1.10169	5.91762	6.92488	1.10169	2.47775	1.12642
Fgf16	0.314767	1.3535	6.01205	0.314767	2.44961	1.09916
Slitrk2	0.125907	0.661011	1.19612	0.125907	2.443	1.08985
Tmem110	0.0944302	0.661011	1.19612	0.0944302	2.42579	1.07058
Fam107a	0.157384	0.912825	1.66827	0.157384	2.4083	1.05167
Bend4	0.283291	1.3535	5.19366	0.283291	2.40229	1.04709
Kmt2d	0.125907	0.723965	1.29055	0.125907	2.39627	1.04285
Ifnar1	0.0944302	0.692488	1.22759	0.0944302	2.39359	1.04054
Tmem126a	0.18886	1.03873	1.92008	0.18886	2.38475	1.02866
Igsf11	0.0944302	0.723965	1.32202	0.0944302	2.36866	1.01505
Ncoa1	0.220337	1.16464	2.01451	0.220337	2.36715	1.01364
Pou3f2	0.0944302	0.723965	1.38498	0.0944302	2.35311	1.00104
Runx1t1	0.283291	4.94185	5.5399	0.283291	2.32361	0.968601
Tsc22d3	0.0944302	0.818395	1.54236	0.0944302	2.31738	0.96358
Igsf3	0.0944302	0.692488	1.25907	0.0944302	2.31185	0.959434
Gsk3b	0.0944302	0.661011	1.19612	0.0944302	2.31151	0.959434
Ptpn2	0.18886	4.1864	5.414	0.18886	2.30676	0.957132
Efr3a	0.0629534	0.629534	1.16464	0.0629534	2.30424	0.954889
Smc6	0.472151	5.85467	6.92488	0.472151	2.30402	0.954889
Ttc33	0.629534	6.04353	7.14522	0.629534	2.30361	0.954889
Mysm1	0.283291	4.53265	5.31957	0.283291	2.30068	0.952584
Tmed7	0.220337	1.29055	2.2978	0.220337	2.29785	0.94852
Kdelr2	0.0944302	0.692488	1.29055	0.0944302	2.28504	0.942679
Gfod1	0.0629534	0.440674	1.73122	0.0629534	2.2849	0.942679
2010012O05Rik	0.0944302	0.723965	1.29055	0.0944302	2.28133	0.938506
Fam134b	0.346244	6.26387	7.23965	0.346244	2.28092	0.938506
Ubc	0.0629534	0.661011	1.19612	0.0629534	2.27292	0.930775
Ythdf2	0.0629534	0.692488	1.29055	0.0629534	2.26068	0.919396
Micu3	0.0944302	0.881348	2.23485	0.0944302	2.25718	0.917582
Gja5	0.18886	1.22759	2.36075	0.18886	2.25543	0.917255
Klhl2	0	0.0944302	5.35104	0	2.22718	0.888657
Pura	0.661011	4.56413	6.79897	0.661011	2.21197	0.871339
Ankrd6	0.283291	2.26632	7.42851	0.283291	2.21047	0.871038
Ppp1r15b	0.283291	6.7675	7.45998	0.283291	2.19251	0.858364
Atn1	0.283291	6.79897	7.39703	0.283291	2.18034	0.847895
Zfp329	0.0314767	0.629534	1.25907	0.0314767	2.1755	0.841894
Cyp4f15	0.0629534	0.786918	1.51088	0.0629534	2.1751	0.841894
Peg12	0.283291	4.87889	5.69729	0.283291	2.17216	0.840073
1700042G15Rik	0.0944302	5.22514	5.82319	0.0944302	2.16613	0.834361
Nacc2	0.0629534	0.692488	1.29055	0.0629534	2.16191	0.830477
Sparc	0.18886	2.67552	3.90311	0.18886	2.16094	0.830477
Eva1a	0.0629534	0.786918	1.51088	0.0629534	2.15675	0.828373
A630089N07Rik	0.0314767	0.598058	1.10169	0.0314767	2.15619	0.828373
4921536K21Rik	0.0314767	0.503628	2.07746	0.0314767	2.15326	0.823921
Ecd	0.0944302	1.00726	3.80868	0.0944302	2.14863	0.819348
Wdr12	0.314767	5.31957	6.8934	0.314767	2.14474	0.816128
Kif26a	0.0314767	0.314767	1.13316	0.0314767	2.1437	0.8158
Nprl2	0.18886	2.2978	3.96607	0.18886	2.13659	0.808937
Sdc4	0.0314767	0.661011	1.19612	0.0314767	2.12963	0.798806
Rtp4	0	0.0629534	6.45273	0	2.11478	0.781205
Fli1	0.0944302	1.10169	2.07746	0.0944302	2.11202	0.779275
Birc6	0.0314767	0.629534	1.19612	0.0314767	2.1084	0.776401
Tmem234	0.0629534	1.03873	1.85713	0.0629534	2.10599	0.77325
Foxc1	0.0629534	1.00726	2.14042	0.0629534	2.10509	0.772954
Pgpep1	0.0314767	0.692488	1.38498	0.0314767	2.10016	0.77016
Slc35g2	0.157384	5.44547	7.45998	0.157384	2.09975	0.77016
Cbfa2t2	0.0314767	0.629534	4.69003	0.0314767	2.09703	0.769936
Timmdc1	0.0314767	0.598058	1.16464	0.0314767	2.09277	0.769936
Raver2	0.157384	6.57864	7.33408	0.157384	2.08732	0.7646
C5ar2	0.0629534	1.16464	2.14042	0.0629534	2.08346	0.761584
Ppp1r9b	0.283291	6.10648	6.8934	0.283291	2.0824	0.760454
Cpeb1	0.18886	5.50843	6.98783	0.18886	2.07452	0.750844
Grk4	0	0.598058	1.13316	0	2.07199	0.748625
Arih2	0.18886	5.82319	6.92488	0.18886	2.07029	0.748337
Slc35d2	0.0944302	4.46969	5.25661	0.0944302	2.06935	0.748337
Dnal1	0.0944302	5.63433	6.32682	0.0944302	2.06192	0.742017
Abat	0.0314767	0.912825	1.79417	0.0314767	2.0577	0.739685
Nras	0	0.661011	1.25907	0	2.04785	0.726604
Cdpf1	0.125907	5.44547	6.92488	0.125907	2.0424	0.721252
Hectd1	0.0944302	5.66581	6.86193	0.0944302	2.03749	0.718767
Cog7	0.0629534	2.10894	7.14522	0.0629534	2.03728	0.718767
Lysmd1	0.0944302	6.29534	7.45998	0.0944302	2.03669	0.718625
Wdr60	0.125907	5.09923	6.29534	0.125907	2.0356	0.717929
Fem1b	0.125907	5.76024	6.86193	0.125907	2.03534	0.717929
Tubb5	0	0.661011	1.29055	0	2.03123	0.715773
Entpd7	0	0.503628	3.93459	0	2.02745	0.711713
Trip4	0	0.629534	1.22759	0	2.00423	0.690582
Rpl30	0.0629534	3.93459	6.26387	0.0629534	2.00376	0.690582
Uap1	0	6.04353	7.27112	0	1.98153	0.670288
Vsx1	0	0.377721	1.98303	0	1.98117	0.670288
Dnajb1	0	1.98303	3.84016	0	1.97988	0.668633
Cdkn1b	0	0.598058	1.19612	0	1.97524	0.66376
Sntb1	0	5.91762	6.86193	0	1.96998	0.659174
Dsg2	0	0.535104	2.20337	0	1.96828	0.657624
Lonrf3	0	1.69974	7.45998	0	1.96726	0.657105
Kirrel2	0	0.881348	1.82565	0	1.96565	0.654861
Eif4g1	0	0.944302	1.8886	0	1.96446	0.654861
Mum1	0	1.73122	6.54716	0	1.96317	0.653201
Gm9696	-0.0314767	0.409197	1.82565	0	1.95725	0.647829
4933413J09Rik	-0.0314767	0.220337	1.07021	0	1.95369	0.642928
Stim2	-0.0314767	0.0944302	3.80868	0	1.9514	0.640117
Ncdn	-0.0314767	5.57138	6.70454	0	1.94941	0.638265
Syn3	-0.0314767	0.692488	5.19366	0	1.94197	0.630591
Angel2	-0.0314767	0.661011	1.29055	0	1.93603	0.623126
Fam120c	-0.0944302	6.01205	6.67307	0	1.93292	0.619969
Tsix	-0.0314767	0.283291	0.881348	0	1.92717	0.617574
Ogt	-0.0314767	0.786918	1.47941	0	1.92343	0.614089
Glis2	-0.0314767	0.220337	6.20091	0	1.92024	0.61057
P3h1	-0.0314767	5.44547	6.70454	0	1.90967	0.596868
Hexim1	-0.0944302	5.76024	6.98783	0	1.90624	0.594841
Tbx3	-0.0314767	0.314767	1.73122	0	1.89976	0.588288
Prex2	-0.0314767	0.661011	1.32202	0	1.89924	0.588017
Trpm7	-0.0629534	1.25907	3.6513	0	1.89713	0.584741
Magt1	-0.0629534	0.975778	1.95156	0	1.89479	0.582468
Mcmbp	-0.0314767	0.566581	1.16464	0	1.89282	0.581339
Ddx50	-0.0944302	1.92008	7.01931	0	1.89247	0.581339
Usp18	-0.0314767	0.157384	5.66581	0	1.89105	0.581339
2510002D24Rik	-0.157384	0.818395	4.09197	0	1.88242	0.571219
Sub1	-0.0314767	0.598058	1.19612	0	1.87927	0.569528
Cnot7	-0.125907	2.26632	6.83045	0	1.87888	0.569504
Bcl11b	-0.0314767	0.440674	2.36075	0	1.87676	0.566528
Akap11	-0.157384	4.87889	6.26387	0	1.87465	0.565576
Hif3a	-0.18886	5.414	6.73602	0	1.87263	0.564729
Kcnk1	-0.0314767	0.472151	0.912825	0	1.86946	0.560826
2610100L16Rik	-0.18886	5.85467	6.70454	0	1.86352	0.554475
Irak1	-0.0314767	0.535104	1.03873	0	1.85969	0.551423
Pcsk1n	-0.0629534	0.723965	1.47941	0	1.85558	0.544886
Tcf7l2	-0.0314767	0.535104	1.13316	0	1.85452	0.544372
Angel1	-0.0629534	0.0629534	6.57864	0	1.85194	0.542261
Pisd-ps1	-0.0629534	0.723965	1.41645	0	1.85007	0.540721
Mpzl1	-0.157384	2.20337	3.58835	0	1.84902	0.540721
Itpripl1	-0.0944302	1.03873	2.20337	0	1.84824	0.540721
Zfp65	-0.0629534	0.535104	1.07021	0	1.84616	0.539625
Cand2	-0.0944302	0.629534	4.78446	0	1.84207	0.536005
Colec12	-0.157384	4.31231	5.19366	0	1.83417	0.527071
Prune2	-0.0629534	0.503628	1.03873	0	1.82914	0.522361
Acadm	-0.0629534	0.692488	1.38498	0	1.82848	0.522347
Luc7l2	-0.0629534	0.566581	1.16464	0	1.81833	0.509205
Ppcdc	-0.220337	2.04599	7.33408	0	1.81676	0.509173
Ebf1	-0.0629534	0.377721	1.63679	0	1.81414	0.509173
Il17re	-0.0944302	0.912825	2.17189	0	1.81242	0.507484
Mn1	-0.0629534	0.535104	1.13316	0	1.80514	0.499646
Khsrp	-0.0629534	0.661011	1.41645	0	1.80121	0.492726
Nudt16	-2.36075	0.314767	6.10648	0	1.80079	0.492612
Degs1	-0.0629534	0.535104	1.10169	0	1.79966	0.491787
Zyg11b	-0.0629534	0.535104	1.19612	0	1.79749	0.490347
Fads2	-0.0629534	0.598058	1.25907	0	1.79561	0.489449
Nfkbie	-0.0629534	0.377721	2.10894	0	1.79474	0.48943
Apopt1	-0.0629534	0.566581	1.16464	0	1.79345	0.48943
Nmd3	-0.220337	6.07501	7.23965	0	1.79129	0.489273
Cpe	-0.0314767	0.503628	0.755441	0	1.78801	0.486716
Csnk2a1	-0.0629534	0.566581	1.19612	0	1.77169	0.47037
Rmi2	-0.0629534	0.472151	0.975778	0	1.77052	0.47037
Dbp	-0.0944302	0.661011	1.38498	0	1.77052	0.47037
Nup98	-0.0629534	0.535104	1.10169	0	1.76331	0.46399
Ttc5	-0.0629534	0.535104	1.13316	0	1.75908	0.45778
Foxp2	-0.125907	0.912825	1.95156	0	1.75656	0.454858
Os9	-0.0944302	0.755441	1.73122	0	1.75497	0.453111
Tmem144	-0.377721	5.44547	6.7675	0	1.74982	0.445724
Btg1	-0.0944302	0.566581	1.16464	0	1.74905	0.445703
Sparcl1	-0.0314767	0.283291	0.503628	0	1.74878	0.445703
Unc50	-0.0944302	0.723965	1.54236	0	1.74647	0.44471
Tmem170b	-0.0944302	0.692488	1.44793	0	1.74633	0.44471
Nol11	-0.251814	5.57138	7.33408	0	1.74419	0.44471
Spin1	-0.18886	1.25907	3.49392	0	1.74149	0.443697
D930020B18Rik	-0.125907	0.314767	4.40674	0	1.74062	0.443697
Pax6	-0.0944302	0.535104	1.16464	0	1.73914	0.44223
Coq6	-0.472151	5.98058	7.14522	0	1.73882	0.44223
Dbr1	-0.0944302	0.157384	6.67307	0	1.73613	0.441553
2020-09-07	-0.0944302	0.566581	1.16464	0	1.73577	0.441553
Samd8	-0.0944302	0.503628	1.07021	0	1.73514	0.441553
Xpo7	-0.157384	0.818395	4.24936	0	1.73459	0.441135
2610524H06Rik	-0.409197	1.7627	5.88615	0	1.73041	0.435727
Fgf1	-0.251814	1.41645	3.21063	0	1.72883	0.435727
Zc2hc1a	-0.251814	5.60286	7.11374	0	1.72794	0.435326
Stx16	-0.503628	1.13316	6.04353	0	1.72617	0.434083
Acta2	-0.220337	1.16464	2.61257	0	1.72258	0.431452
Yme1l1	-0.0944302	0.535104	1.10169	0	1.72124	0.430036
Msl1	-0.251814	0.692488	4.5956	0	1.72087	0.429962
Wdr75	-0.314767	5.82319	7.11374	0	1.71691	0.426096
Dennd5b	-0.0944302	0.440674	0.944302	0	1.71656	0.426096
Mrps10	-0.346244	1.82565	7.3026	0	1.71605	0.426096
Rab30	-0.283291	1.63679	3.58835	0	1.71591	0.426096
Golt1b	-0.125907	0.818395	1.79417	0	1.71095	0.419111
Nup50	-0.346244	1.60531	7.45998	0	1.70512	0.416998
Pros1	-0.314767	1.44793	7.20817	0	1.70432	0.416998
Drg1	-0.18886	1.00726	2.32928	0	1.70404	0.416998
Als2	-0.0944302	0.535104	1.16464	0	1.70361	0.416799
Dusp22	-0.251814	1.10169	4.65856	0	1.70247	0.41675
Slc35c1	-0.0629534	0.125907	6.48421	0	1.70196	0.41675
Itfg1	-0.125907	0.629534	1.3535	0	1.70066	0.416123
Cend1	-0.283291	1.32202	3.30506	0	1.69886	0.415135
Hexdc	-0.535104	4.21788	5.79172	0	1.69816	0.415034
Trim8	-0.125907	0.629534	1.54236	0	1.69816	0.415034
Gprc5c	-0.157384	0.944302	2.10894	0	1.69659	0.414039
Cxcr2	-0.0944302	0.503628	1.00726	0	1.69635	0.414039
Mmp15	-0.409197	6.23239	7.3026	0	1.69431	0.411309
Pcnt	-0.0314767	0.0629534	6.32682	0	1.69196	0.408613
Vapa	-0.125907	0.598058	1.22759	0	1.69169	0.408613
Rufy2	-0.409197	4.43822	5.5399	0	1.69135	0.408613
Snhg11	-0.0944302	0.472151	0.975778	0	1.68688	0.405601
Ccz1	-0.440674	6.04353	7.01931	0	1.68012	0.398629
Fam160a2	-0.755441	5.47695	7.05079	0	1.6786	0.39766
Atraid	-0.0944302	0.472151	1.10169	0	1.67434	0.393267
Prodh	-0.0944302	0.535104	1.13316	0	1.67224	0.391941
Etnppl	-0.283291	1.19612	2.48666	0	1.66454	0.38608
Dusp3	-0.125907	0.535104	1.13316	0	1.6642	0.38608
Rpl35	-0.125907	0.566581	1.16464	0	1.66388	0.38608
Hyls1	-0.18886	0.912825	1.92008	0	1.66247	0.385153
1200014J11Rik	-0.125907	0.566581	4.65856	0	1.66199	0.385153
Appl2	-0.0944302	0.503628	1.07021	0	1.65755	0.383288
Morf4l1	-0.125907	0.535104	1.13316	0	1.65727	0.383288
Erlin1	-0.503628	5.79172	7.05079	0	1.65633	0.382367
9430018G01Rik	-0.0629534	0.251814	0.975778	0	1.65595	0.382228
Tap1	-0.0629534	0.0629534	5.66581	0	1.65046	0.378881
Gnptab	-0.409197	1.66827	7.39703	0	1.64985	0.378881
Parp4	-1.19612	5.98058	6.38978	0	1.6485	0.377393
Gareml	-0.283291	1.07021	2.45518	0	1.64528	0.373498
Rbm42	-0.18886	0.786918	2.2978	0	1.6413	0.368117
Trim72	-0.18886	0.944302	1.92008	0	1.63667	0.363861
2500004C02Rik	-0.125907	0.503628	1.07021	0	1.63386	0.363099
Fkbp7	-0.535104	6.04353	6.8934	0	1.63142	0.363099
Got2	-0.440674	5.22514	6.83045	0	1.62869	0.361246
Ptges2	-0.283291	1.10169	3.21063	0	1.62864	0.361246
Tmf1	-0.125907	0.535104	1.13316	0	1.62641	0.358455
Rpl19	-0.125907	0.566581	1.22759	0	1.62389	0.357162
Adhfe1	-0.125907	0.598058	1.32202	0	1.62377	0.357162
Nup155	-0.0629534	0.18886	4.94185	0	1.62288	0.356005
Trrap	-0.535104	1.73122	6.20091	0	1.617	0.34981
Ccdc78	-0.346244	4.62708	5.414	0	1.61664	0.349719
Gdf1	-0.157384	0.598058	1.41645	0	1.61391	0.349353
Rgs20	-0.125907	0.566581	1.29055	0	1.61348	0.349353
Gm17821	-0.0944302	0.409197	0.881348	0	1.61344	0.349353
Clmn	-0.220337	0.786918	1.66827	0	1.60967	0.342602
Atp6v0c-ps2	-0.125907	0.566581	1.16464	0	1.60911	0.342602
Cluap1	-0.629534	5.79172	6.64159	0	1.60804	0.34168
Limch1	-0.314767	1.29055	3.21063	0	1.606	0.340992
Tdrd7	-0.0944302	0.0314767	7.33408	0	1.60532	0.340816
Abhd8	-0.346244	1.13316	3.39949	0	1.60279	0.34021
Phex	-0.125907	0.314767	2.51814	0	1.60139	0.338621
Trim32	-0.881348	6.13796	7.08226	0	1.59681	0.333783
Exoc2	-0.409197	1.47941	6.83045	0	1.5964	0.333783
Rbm15	-0.881348	0.881348	4.5956	0	1.59352	0.332318
Adsl	-0.220337	0.881348	1.92008	0	1.5825	0.319061
Gpc5	-0.125907	0.503628	1.10169	0	1.58238	0.319061
Atp2a2	-0.220337	0.723965	1.47941	0	1.58094	0.319061
Gfpt1	-1.10169	5.09923	6.26387	0	1.57631	0.313057
Gm10371	-0.125907	0.314767	1.44793	0	1.57328	0.309373
Sec23ip	-0.157384	0.472151	1.07021	0	1.57115	0.305716
Sult1a1	-0.283291	0.912825	2.95881	0	1.56128	0.293691
Zfp318	-0.881348	4.24936	5.66581	0	1.55925	0.291333
Canx	-0.157384	0.535104	1.19612	0	1.55558	0.286914
Abhd17b	-0.535104	1.82565	6.10648	0	1.55471	0.286346
Gm14420	-0.472151	0.661011	4.34379	0	1.54769	0.279273
Chmp7	-0.535104	1.85713	3.61982	0	1.54701	0.279087
Lpar1	-0.157384	0.251814	6.04353	0	1.54566	0.278141
Rbm4b	-0.566581	1.44793	6.70454	0	1.54307	0.276097
Celf2	-0.220337	0.786918	1.7627	0	1.53906	0.271518
Apod	-0.503628	5.19366	9.72631	0	1.53778	0.271518
Cltc	-0.157384	0.566581	1.22759	0	1.53769	0.271518
Sp8	-0.283291	0.881348	2.07746	0	1.53528	0.270091
Gpalpp1	-3.33653	0.503628	4.34379	0	1.53304	0.268418
Tmem9	-0.18886	0.598058	1.38498	0	1.53159	0.268418
Zfp346	-0.125907	0.0944302	6.42125	0	1.51984	0.255757
Cd300a	-3.39949	0.503628	4.53265	0	1.51743	0.253774
Grin3a	-0.125907	0.283291	1.29055	0	1.51598	0.253293
Rheb	-0.157384	0.472151	1.00726	0	1.51376	0.252245
Pgm2l1	-0.157384	0.346244	1.8886	0	1.51269	0.252245
Ccnd2	-0.18886	0.598058	1.32202	0	1.50544	0.24617
Polr3gl	-0.125907	0.409197	0.912825	0	1.50469	0.24617
Zfp691	-0.125907	0.409197	0.912825	0	1.50362	0.24617
Fam89b	-0.566581	1.41645	6.48421	0	1.50289	0.245603
Wwp1	-3.05324	0.0944302	6.54716	0	1.50255	0.245478
Atpaf2	-0.283291	0.598058	4.5956	0	1.50199	0.245478
Kat6b	-1.07021	5.63433	6.48421	0	1.49616	0.237323
Phf14	-1.07021	3.80868	5.0048	0	1.49073	0.23349
Pvrl1	-2.10894	1.95156	6.29534	0	1.49009	0.232885
Tirap	-0.723965	4.31231	5.25661	0	1.4892	0.232677
Lin7c	-0.503628	1.29055	3.61982	0	1.48224	0.227406
Git1	-0.818395	4.97332	6.3583	0	1.48132	0.227406
Isoc2b	-2.58109	5.60286	7.11374	0	1.47956	0.225487
Dlg1	-0.598058	1.32202	4.75299	0	1.47933	0.225487
Tial1	-0.220337	0.598058	1.3535	0	1.4768	0.223942
5930403L14Rik	-0.472151	1.29055	3.27358	0	1.47561	0.223942
Tpgs2	-0.157384	0.472151	1.03873	0	1.47254	0.223059
Akap9	-0.377721	0.849872	1.92008	0	1.47121	0.223059
Evi5	-0.598058	1.60531	6.79897	0	1.47117	0.223059
Zfp182	-0.944302	0.157384	5.66581	0	1.47082	0.223012
Zfyve19	-4.02902	0.251814	6.16944	0	1.47008	0.223012
Iqsec1	-0.157384	0.409197	0.944302	0	1.46693	0.221007
Tgfbr1	-0.629534	1.32202	6.92488	0	1.46676	0.221007
Alkbh1	-1.60531	5.50843	6.38978	0	1.46648	0.221007
Cdc123	-0.346244	0.944302	1.8886	0	1.46606	0.221007
Acbd3	-2.07746	5.44547	6.38978	0	1.46395	0.218408
Timp3	-0.220337	0.535104	1.13316	0	1.45902	0.215938
Rtn1	-0.503628	1.00726	2.61257	0	1.45847	0.215938
Sobp	-0.220337	0.314767	5.03628	0	1.45838	0.215938
Prkci	-1.00726	5.50843	6.57864	0	1.45622	0.215304
Tmem179b	-0.314767	0.818395	2.20337	0	1.45617	0.215304
Gltscr1l	-0.0944302	0.220337	5.50843	0	1.45572	0.215259
Gm20751	-1.57384	0.409197	5.60286	0	1.45561	0.215259
Phlpp1	-0.409197	0.975778	2.80143	0	1.45332	0.213366
Zfp316	-0.661011	4.28083	5.16218	0	1.45221	0.212215
Bri3bp	-0.409197	0.786918	3.36801	0	1.45114	0.21151
Cd38	-0.346244	0.849872	2.07746	0	1.45105	0.21151
Trmt1	-2.01451	3.80868	6.20091	0	1.45063	0.21151
Mier3	-0.818395	2.01451	6.57864	0	1.45018	0.21151
Ttc26	-0.912825	4.87889	5.85467	0	1.45003	0.21151
Nckap1	-0.283291	0.723965	1.57384	0	1.44763	0.209925
Serpinh1	-0.251814	0.598058	1.41645	0	1.44612	0.209134
4833420G17Rik	-0.251814	0.629534	1.57384	0	1.44423	0.209077
Bmp7	-0.566581	1.13316	6.26387	0	1.44367	0.209077
Gria2	-0.251814	0.661011	1.41645	0	1.44342	0.209077
Amfr	-0.283291	0.723965	1.63679	0	1.4421	0.207505
Dkk3	-0.220337	0.503628	1.10169	0	1.4393	0.203462
Fkbp3	-0.220337	0.566581	1.25907	0	1.43712	0.20336
Suv420h1	-2.76995	0.503628	4.97332	0	1.4366	0.202846
Fuz	-0.692488	1.41645	7.05079	0	1.43562	0.201401
Dqx1	-0.440674	0.818395	5.79172	0	1.43279	0.200502
Luzp2	-0.220337	0.535104	1.13316	0	1.43196	0.199897
Dclre1c	-0.18886	0.440674	1.00726	0	1.4297	0.197477
Plxdc2	-0.598058	0.0314767	6.86193	0	1.42894	0.196959
Foxo1	-0.220337	0.535104	1.22759	0	1.42892	0.196959
Gyk	-0.440674	0.944302	2.17189	0	1.42827	0.196723
Gpc3	-0.346244	0.503628	5.79172	0	1.42645	0.195113
Ndufs2	-0.18886	0.472151	1.07021	0	1.42602	0.194841
A430033K04Rik	-1.57384	3.71425	5.76024	0	1.42502	0.193879
Tox	-1.3535	1.44793	2.86438	0	1.42154	0.191947
Ubxn4	-0.377721	0.881348	2.04599	0	1.42136	0.191947
Cdr2l	-0.283291	0.251814	6.01205	0	1.42096	0.191947
Ctsl	-0.157384	0.377721	0.912825	0	1.41937	0.190466
Slc25a35	-0.661011	1.41645	7.45998	0	1.41558	0.188459
Klf10	-0.18886	0.251814	4.84742	0	1.41534	0.188459
Mrpl21	-0.440674	0.912825	3.1162	0	1.41305	0.186572
Rorb	-0.18886	0.440674	1.03873	0	1.41301	0.186572
1810014B01Rik	-0.755441	1.3535	6.73602	0	1.41247	0.185991
Ndufb5	-0.220337	0.503628	1.10169	0	1.41137	0.185334
Lgals3bp	-0.377721	0.786918	2.39223	0	1.41136	0.185334
Gm15645	-0.157384	0.377721	0.881348	0	1.41063	0.184598
Zfp422	-0.18886	0.440674	1.03873	0	1.41022	0.184598
Htr1d	-0.157384	0.283291	1.38498	0	1.40852	0.183804
Cdc42bpa	-0.598058	1.44793	3.43096	0	1.40544	0.18046
Cers1	-0.283291	0.598058	1.66827	0	1.40342	0.179572
Basp1	-0.125907	0.220337	0.786918	0	1.40217	0.179572
Scn2b	-0.377721	4.94185	5.57138	0	1.40213	0.179572
Xpo1	-0.535104	1.13316	3.14767	0	1.40167	0.179572
Fjx1	-0.220337	0.535104	1.19612	0	1.40165	0.179572
Orc4	-0.314767	0.723965	1.57384	0	1.40109	0.179572
Fam213a	-0.18886	0.440674	1.07021	0	1.4001	0.179572
Eif2ak2	-1.41645	4.15493	5.03628	0	1.39792	0.176599
Taf13	-0.503628	1.10169	2.67552	0	1.39593	0.175075
Phf21a	-0.723965	1.38498	3.99754	0	1.39528	0.174749
Neu3	-0.18886	0.409197	0.912825	0	1.39506	0.174749
Cpeb4	-0.346244	0.755441	1.85713	0	1.39291	0.173295
Alkbh5	-0.220337	0.472151	1.13316	0	1.39248	0.173295
Tef	-0.409197	0.912825	2.14042	0	1.39206	0.173295
Stc1	-0.0944302	0.18886	0.692488	0	1.38988	0.17088
Psmd11	-0.377721	0.786918	1.95156	0	1.38954	0.17088
Milr1	-0.283291	0.409197	1.92008	0	1.38845	0.170823
Hoxa5	-0.157384	0.283291	1.69974	0	1.38844	0.170823
B3galt1	-0.314767	0.692488	1.73122	0	1.38669	0.169285
Xkr8	-0.157384	0.377721	0.849872	0	1.38577	0.16853
Fgfr1	-0.314767	0.661011	1.60531	0	1.38416	0.166702
Hey1	-0.377721	0.692488	2.36075	0	1.38223	0.165667
Lbp	-0.0944302	0.18886	0.723965	0	1.3819	0.165667
Supt7l	-1.69974	3.87164	5.28809	0	1.38041	0.165175
Adgrl1	-0.377721	0.849872	1.79417	0	1.38029	0.165175
Tyw5	-0.818395	1.69974	3.55687	0	1.3794	0.164491
Gfra1	-0.314767	0.692488	1.7627	0	1.37925	0.164491
Rab6a	-0.346244	0.661011	1.47941	0	1.37894	0.164491
Dlat	-0.598058	1.16464	2.89586	0	1.37846	0.164442
Fat1	-0.975778	6.16944	7.05079	0	1.37841	0.164442
Trappc1	-0.283291	0.598058	1.38498	0	1.37482	0.15984
Adra2b	-0.314767	0.377721	2.54961	0	1.37377	0.158645
Nr6a1	-0.0944302	0.157384	0.661011	0	1.3717	0.157005
Camk2n1	-0.377721	0.723965	1.66827	0	1.36888	0.153227
Rangap1	-1.44793	4.91037	5.76024	0	1.36883	0.153227
Fut10	-0.661011	5.44547	6.67307	0	1.36776	0.15156
Ctnnd1	-0.849872	1.60531	3.30506	0	1.36444	0.147901
Tmem129	-0.251814	0.535104	1.25907	0	1.36356	0.146607
Eif3h	-0.377721	0.755441	1.79417	0	1.36181	0.14653
Top1	-0.723965	1.38498	3.68278	0	1.36175	0.14653
Cd164	-0.220337	0.440674	1.00726	0	1.35929	0.146124
Igf2bp1	-0.125907	0.220337	0.786918	0	1.35586	0.142612
Rnd3	-0.472151	0.818395	2.64404	0	1.3543	0.142612
Baz1b	-0.975778	1.54236	6.64159	0	1.35383	0.142612
1700029J07Rik	-1.7627	5.5399	6.29534	0	1.35346	0.142612
Ubl3	-0.283291	0.598058	1.38498	0	1.35333	0.142612
Senp1	-3.96607	0.157384	6.45273	0	1.35332	0.142612
Nanos1	-0.409197	0.849872	1.79417	0	1.35221	0.142487
Lyrm4	-0.220337	0.472151	1.19612	0	1.35201	0.142487
Marf1	-0.18886	0.377721	0.912825	0	1.3505	0.142487
Rbm34	-2.45518	4.15493	5.03628	0	1.35018	0.142487
Ttc12	-3.68278	0.125907	0.881348	0	1.34989	0.142487
C2cd4c	-0.0944302	0.18886	1.07021	0	1.34983	0.142487
Phf23	-0.818395	5.47695	6.64159	0	1.34957	0.142487
Mtfmt	-2.67552	4.09197	5.19366	0	1.34804	0.141567
Ncam2	-0.755441	1.51088	3.61982	0	1.34736	0.141194
Glt8d1	-0.472151	0.849872	2.26632	0	1.34691	0.14078
Ubtd2	-0.0944302	0.0314767	6.20091	0	1.346	0.139935
Jakmip2	-0.18886	0.18886	0.692488	0	1.34468	0.138521
Trappc12	-0.692488	0.912825	7.27112	0	1.3442	0.138521
Ino80dos	-1.66827	2.92734	5.85467	0	1.34381	0.138521
Ric8	-0.692488	0.912825	6.92488	0	1.34279	0.137447
Gpank1	-0.849872	5.44547	6.70454	0	1.33927	0.135872
Abcb7	-2.07746	4.09197	5.28809	0	1.33827	0.135872
Pcdh10	-0.283291	0.598058	1.41645	0	1.33442	0.131907
Gm10012	-0.409197	0.818395	1.92008	0	1.33379	0.131907
Btrc	-0.723965	1.22759	7.3026	0	1.33137	0.131907
Tmem47	-0.18886	0.377721	0.881348	0	1.33088	0.131907
Zfp870	-0.818395	3.84016	5.0048	0	1.3302	0.131907
Arid3a	-0.157384	0.220337	1.16464	0	1.32705	0.131553
Socs2	-0.157384	0.251814	1.29055	0	1.32568	0.131553
Cnr1	-0.786918	1.32202	7.27112	0	1.32547	0.131553
Supt3	-0.818395	1.79417	3.55687	0	1.32462	0.131553
Tusc5	-0.409197	0.755441	1.82565	0	1.32446	0.131553
Cables2	-0.0944302	0.0629534	5.98058	0	1.32442	0.131553
Rps8	-0.251814	0.472151	1.10169	0	1.32164	0.129035
Ankrd29	-0.409197	0.818395	2.14042	0	1.32054	0.128106
Dpp7	-4.34379	5.91762	7.23965	0	1.31598	0.121317
Ctrcos	-0.566581	1.10169	2.92734	0	1.3138	0.120714
Cdc27	-1.10169	1.44793	6.57864	0	1.31132	0.1189
Slc25a28	-1.66827	0.0944302	5.85467	0	1.31099	0.1189
Itgb4	-0.125907	0.18886	0.881348	0	1.30933	0.118611
Ube2v2	-0.283291	0.566581	1.32202	0	1.30859	0.118207
Ppp2ca	-0.535104	0.944302	2.86438	0	1.30613	0.118207
Zfp40	-0.157384	0.0944302	5.9491	0	1.30577	0.118207
D330045A20Rik	-0.125907	0.18886	0.755441	0	1.30319	0.115907
Sarm1	-0.283291	0.220337	2.86438	0	1.30279	0.115831
Wrnip1	-0.535104	0.944302	1.95156	0	1.30156	0.114698
Herpud1	-0.283291	0.503628	1.16464	0	1.30104	0.114446
Acox1	-0.314767	0.566581	1.3535	0	1.29952	0.112614
Pcyox1	-0.566581	0.849872	1.7627	0	1.29899	0.112614
Dpy19l3	-0.598058	0.849872	2.51814	0	1.2973	0.11074
Pdrg1	-0.566581	0.912825	2.67552	0	1.29551	0.109922
Dctn6	-0.535104	0.818395	2.14042	0	1.29312	0.109922
Rbck1	-0.786918	5.38252	7.05079	0	1.29284	0.109922
Vamp4	-0.535104	0.692488	1.63679	0	1.29281	0.109922
2410015M20Rik	-0.220337	0.409197	1.00726	0	1.29129	0.109653
Slc1a2	-0.157384	0.251814	0.661011	0	1.2894	0.10874
Ckap5	-0.283291	0.535104	1.32202	0	1.28906	0.10874
Gpx7	-0.786918	1.63679	3.87164	0	1.28854	0.10874
Jkamp	-0.220337	0.409197	1.03873	0	1.28564	0.107385
Epm2aip1	-0.912825	1.41645	6.61011	0	1.28321	0.105783
Mthfs	-1.32202	2.83291	4.62708	0	1.28278	0.105783
Mpc2	-0.251814	0.440674	1.10169	0	1.28229	0.105783
Hdgfl1	-0.18886	0.283291	1.47941	0	1.27764	0.101515
Tmem160	-0.346244	0.566581	1.63679	0	1.27589	0.0997058
Agpat1	-0.220337	0.409197	0.975778	0	1.27443	0.0993736
Opa3	-0.786918	1.16464	3.68278	0	1.27438	0.0993736
Tnfaip6	-1.16464	1.41645	6.29534	0	1.2742	0.0993736
Col19a1	-0.18886	0.251814	1.00726	0	1.27349	0.099352
Mex3c	-1.07021	5.28809	6.42125	0	1.27092	0.0982075
Cml1	-0.251814	0.440674	1.13316	0	1.27077	0.0982075
Cdc42se1	-0.661011	0.944302	3.05324	0	1.27044	0.0982075
Gtf3c5	-0.786918	1.38498	3.17915	0	1.26873	0.0977156
Odc1	-0.755441	1.25907	3.49392	0	1.26752	0.0977156
Zfp935	-0.18886	0.346244	0.818395	0	1.26521	0.0953193
Ttf1	-1.41645	4.0605	5.414	0	1.26514	0.0953193
Ifit2	-0.0944302	0.0629534	5.414	0	1.26382	0.0943154
Gdi1	-0.283291	0.503628	1.19612	0	1.26319	0.0943154
Slc11a2	-4.24936	5.82319	6.64159	0	1.26308	0.0943154
Zic3	-0.220337	0.283291	1.69974	0	1.26277	0.0941662
Kcnj16	-0.598058	5.50843	6.32682	0	1.26129	0.0921038
Eef2kmt	-1.63679	0.723965	5.57138	0	1.26077	0.0915243
Tmem45b	-0.251814	0.314767	1.98303	0	1.25956	0.0900036
Ulk3	-0.472151	5.47695	6.13796	0	1.25915	0.0899087
Epdr1	-0.314767	0.535104	1.32202	0	1.25775	0.0897393
Gmeb1	-0.220337	0.377721	0.912825	0	1.25543	0.0881964
Eif4ebp1	-0.125907	0	6.3583	0	1.2547	0.0875747
Atp1a2	-0.157384	0.283291	0.661011	0	1.25337	0.0875747
Eef2	-0.314767	0.535104	1.51088	0	1.25251	0.0875747
Araf	-0.283291	0.440674	1.25907	0	1.25222	0.0875747
Eppk1	-0.220337	0.283291	1.47941	0	1.25103	0.0875747
Rnf130	-0.535104	0.818395	2.20337	0	1.25055	0.0875747
U2surp	-0.535104	0.818395	1.85713	0	1.24818	0.0875747
Polr2d	-0.598058	0.755441	3.08472	0	1.24815	0.0875747
Agap2	-0.472151	4.69003	5.25661	0	1.24752	0.0875747
Pgm1	-4.21788	0.0944302	6.23239	0	1.24746	0.0875747
Eci1	-0.283291	0.440674	1.10169	0	1.24614	0.0875747
Mpv17	-0.283291	0.472151	1.16464	0	1.24564	0.0875747
Phf3	-2.80143	0.283291	5.60286	0	1.24515	0.0875747
Insr	-1.8886	5.5399	6.64159	0	1.24396	0.0875747
Ift27	-0.283291	0.472151	1.07021	0	1.24321	0.0870773
Tmed2	-0.220337	0.346244	0.912825	0	1.24188	0.0866717
Fahd1	-0.629534	0.912825	2.73848	0	1.24183	0.0866717
Cdh2	-0.251814	0.440674	1.10169	0	1.24161	0.0866717
Lrrc4	-0.0944302	0	5.82319	0	1.2398	0.0834583
D2Wsu81e	-0.944302	0.975778	6.16944	0	1.23828	0.0832795
Psmb2	-0.283291	0.440674	1.07021	0	1.23825	0.0832795
Fbxo18	-0.723965	1.25907	3.55687	0	1.23744	0.0832795
D1Ertd622e	-3.74573	5.63433	6.51568	0	1.23637	0.0820487
Zfp84	-0.377721	0.220337	6.01205	0	1.23534	0.081422
Ccdc88a	-0.377721	0.566581	1.25907	0	1.23481	0.081422
Kmt2a	-1.07021	1.07021	3.14767	0	1.2347	0.081422
Ppm1k	-0.220337	0.346244	0.881348	0	1.23434	0.0813201
Gm16386	-0.0629534	0	5.35104	0	1.23389	0.0813201
Bcap31	-0.283291	0.472151	1.10169	0	1.23343	0.0813201
Klf3	-0.975778	1.25907	6.83045	0	1.22884	0.0771468
Dstn	-0.346244	0.535104	1.41645	0	1.22859	0.0771468
Cdc26	-0.818395	1.07021	3.14767	0	1.22845	0.0771468
Rexo1	-4.15493	0.125907	5.16218	0	1.22491	0.0768234
Ap1s1	-0.755441	1.13316	2.61257	0	1.22383	0.0768234
Fh1	-0.377721	0.535104	1.22759	0	1.22299	0.0768234
Orc3	-0.881348	1.44793	3.68278	0	1.22226	0.0768234
Shisa9	-0.377721	0.535104	1.57384	0	1.22061	0.0768234
Zfp133-ps	-0.251814	0.0314767	6.45273	0	1.22057	0.0768234
Brip1os	-3.71425	0.472151	4.53265	0	1.21992	0.0768234
Arhgap35	-0.440674	0.472151	1.60531	0	1.21987	0.0768234
Slmo1	-0.629534	0.944302	2.54961	0	1.21986	0.0768234
Psen2	-0.849872	1.38498	5.91762	0	1.21776	0.0768234
Nr1d2	-0.535104	0.723965	1.66827	0	1.21591	0.0756435
Bckdk	-0.629534	0.912825	2.04599	0	1.21267	0.0747338
Dennd1a	-0.786918	1.00726	3.02177	0	1.2099	0.0715092
Ccdc85b	-0.314767	0.472151	1.16464	0	1.20984	0.0715092
Inpp5b	-0.849872	1.03873	6.79897	0	1.20938	0.0714407
Arrdc3	-0.598058	0.786918	1.82565	0	1.20658	0.0682508
Rere	-1.00726	1.32202	6.42125	0	1.20495	0.0682508
Tmem258	-0.346244	0.503628	1.3535	0	1.2049	0.0682508
Fyn	-1.00726	1.54236	6.38978	0	1.20431	0.0679169
Dnajb9	-0.377721	0.503628	1.13316	0	1.20316	0.0667085
Cyld	-3.21063	0.535104	4.91037	0	1.20304	0.0667085
Gm13139	-0.125907	0.157384	3.1162	0	1.20201	0.0664111
Apbb2	-3.36801	5.35104	6.42125	0	1.2013	0.0658567
Upf2	-1.41645	4.62708	6.45273	0	1.19816	0.063526
Prkd1	-0.912825	1.38498	3.14767	0	1.19705	0.0630582
Hsdl2	-0.314767	0.472151	1.25907	0	1.1967	0.0628962
Ptrh2	-3.58835	0.535104	4.34379	0	1.19653	0.0628962
Gbas	-0.314767	0.440674	1.07021	0	1.19423	0.0601927
Snrnp200	-0.975778	1.19612	6.79897	0	1.19306	0.0590918
Nme6	-0.975778	1.60531	3.30506	0	1.19068	0.0577193
Homer1	-0.975778	1.63679	6.16944	0	1.18804	0.0559525
Lsm10	-0.975778	1.63679	3.55687	0	1.18702	0.0559525
Arid5b	-3.6513	0.157384	2.83291	0	1.18701	0.0559525
OTTMUSG00000016609	-1.51088	0.692488	4.40674	0	1.18643	0.0557793
Glmp	-0.283291	0.409197	1.07021	0	1.18313	0.0517994
Dapl1	-0.18886	0.220337	1.00726	0	1.18207	0.0500992
Sox8	-0.346244	0.409197	1.03873	0	1.17851	0.0486066
Ankrd10	-4.15493	0.472151	6.54716	0	1.1779	0.0486066
Dffa	-3.77721	0.314767	6.29534	0	1.17734	0.0486066
Celsr2	-1.32202	1.73122	3.90311	0	1.17599	0.0486066
Tmbim6	-0.251814	0.346244	0.912825	0	1.17596	0.0486066
Zc3hc1	-1.00726	1.63679	3.2421	0	1.17579	0.0486066
Mpv17l2	-0.314767	0.409197	0.975778	0	1.17575	0.0486066
Dcbld1	-3.27358	0	6.67307	0	1.17546	0.0486066
Ddx39b	-0.503628	0.692488	1.8886	0	1.17291	0.0475015
Fbl	-1.00726	1.44793	3.6513	0	1.17262	0.0475015
Txndc12	-0.440674	0.566581	1.41645	0	1.17259	0.0475015
Hs6st1	-3.68278	0.251814	5.57138	0	1.17148	0.0475015
Slc4a4	-0.409197	0.535104	1.3535	0	1.17045	0.0463497
C330007P06Rik	-1.03873	1.38498	5.76024	0	1.1699	0.0461118
Acadsb	-0.535104	0.629534	1.60531	0	1.16462	0.0416631
Lpl	-0.440674	0.251814	3.08472	0	1.16419	0.0416631
Sema4b	-0.283291	0.409197	1.03873	0	1.16346	0.0416631
Oaf	-0.283291	0.409197	0.975778	0	1.16343	0.0416631
Luc7l3	-0.314767	0.440674	1.10169	0	1.16317	0.0416631
Srsf6	-0.440674	0.598058	1.73122	0	1.16244	0.0416631
Hypk	-0.535104	0.598058	1.54236	0	1.16211	0.0416631
A330023F24Rik	-1.25907	1.66827	6.54716	0	1.16013	0.0416631
Bpnt1	-0.283291	0.409197	1.10169	0	1.15926	0.0416631
Mmrn2	-0.472151	0.661011	1.7627	0	1.1592	0.0416631
Qk	-0.283291	0.377721	1.00726	0	1.15916	0.0416631
Naaa	-0.314767	0.440674	1.10169	0	1.15901	0.0416631
Serp1	-0.409197	0.566581	1.60531	0	1.1585	0.0416631
Sgpp1	-2.64404	5.60286	6.70454	0	1.1585	0.0416631
Brd8	-0.251814	0.346244	0.944302	0	1.15784	0.0416631
Nrp1	-1.16464	1.3535	3.36801	0	1.15712	0.0416631
G0s2	-0.629534	0.692488	1.98303	0	1.1552	0.0416631
Pdcd6	-0.314767	0.440674	1.07021	0	1.15505	0.0416631
Dctn3	-0.346244	0.472151	1.25907	0	1.15425	0.0416631
D930016D06Rik	-0.503628	0.220337	5.13071	0	1.15207	0.0395616
Pomt2	-3.58835	1.07021	6.70454	0	1.15114	0.0395616
Ndufab1	-0.283291	0.377721	1.00726	0	1.1511	0.0395616
Tmx3	-0.440674	0.566581	1.66827	0	1.1508	0.0395616
Slc38a9	-3.87164	0.157384	6.51568	0	1.15022	0.0392524
6530403H02Rik	-0.598058	0.723965	5.03628	0	1.14974	0.0392363
Src	-0.849872	1.16464	3.17915	0	1.14799	0.03811
Cdh4	-0.220337	0.157384	4.69003	0	1.14796	0.03811
Rprd1a	-0.975778	1.19612	3.14767	0	1.1466	0.0370843
4933409K07Rik	-0.377721	0.409197	0.975778	0	1.14603	0.0369813
Arglu1	-0.251814	0.377721	0.944302	0	1.14567	0.0369813
Tcf7l1	-2.58109	5.76024	6.20091	0	1.14351	0.0369813
Zbtb8os	-1.22759	1.16464	7.01931	0	1.1423	0.0367801
Tacc1	-0.251814	0.346244	0.912825	0	1.142	0.0367801
Msrb2	-1.07021	1.16464	7.01931	0	1.14127	0.0367801
Mrps14	-0.251814	0.346244	0.912825	0	1.14106	0.0367801
Rxrb	-4.53265	0	7.08226	0	1.14058	0.036765
Zfp473	-0.849872	0.314767	3.84016	0	1.13911	0.036765
Tceb1	-0.409197	0.503628	1.22759	0	1.13789	0.036765
Ar	-0.283291	0.251814	1.57384	0	1.13765	0.036765
Cant1	-0.818395	0.944302	2.92734	0	1.13501	0.0339651
Tmc7	-0.881348	1.00726	2.80143	0	1.13456	0.0339651
Esco1	-1.03873	1.38498	4.0605	0	1.13221	0.0339651
Mdm2	-2.58109	1.3535	6.61011	0	1.13163	0.0339651
Asb7	-3.93459	0.18886	5.13071	0	1.1316	0.0339651
Stard3nl	-1.00726	1.32202	2.99029	0	1.13095	0.0336212
Taok2	-3.90311	0.661011	4.21788	0	1.13008	0.0336212
Gm5415	-0.251814	0.251814	1.63679	0	1.12931	0.0333803
Fgf23	-0.251814	0.220337	2.39223	0	1.12922	0.0333803
Tmem208	-0.409197	0.503628	1.19612	0	1.12739	0.0305691
Cdh19	-0.849872	0.975778	2.86438	0	1.12514	0.0276865
Socs5	-0.912825	1.25907	3.71425	0	1.12461	0.0276865
Derl1	-0.346244	0.472151	1.22759	0	1.12433	0.0276865
Gm38415	-0.944302	1.22759	4.84742	0	1.12363	0.0276865
F3	-0.220337	0.283291	0.723965	0	1.12307	0.0276865
Pdcd2l	-0.975778	1.25907	3.27358	0	1.12039	0.0236579
Ak6	-3.96607	0.314767	6.70454	0	1.11924	0.0223796
Ppp1r7	-0.598058	0.723965	2.20337	0	1.11894	0.0223796
Fam120a	-0.723965	0.786918	3.05324	0	1.1174	0.0223796
Wapal	-0.377721	0.440674	1.3535	0	1.11707	0.0223796
Spcs2	-0.314767	0.377721	0.944302	0	1.11702	0.0223796
Ccni	-1.13316	1.3535	6.16944	0	1.11609	0.0212861
Zzz3	-1.57384	0.18886	5.72876	0	1.11513	0.0209483
Smg7	-1.63679	0.818395	4.53265	0	1.11491	0.0209483
F830016B08Rik	-1.19612	3.90311	4.87889	0	1.11476	0.0209483
Zmat5	-0.472151	0.566581	1.47941	0	1.11349	0.0209483
Tbca	-0.723965	0.661011	2.92734	0	1.11344	0.0209483
Mrps34	-0.629534	0.661011	1.82565	0	1.11336	0.0209483
Prpf18	-1.47941	1.07021	6.16944	0	1.11274	0.0209483
Tpmt	-0.440674	0.472151	1.32202	0	1.11262	0.0209483
Tspyl1	-0.535104	0.598058	1.7627	0	1.11053	0.0209399
Ucp3	-1.07021	1.13316	6.04353	0	1.11051	0.0209399
Gpt2	-0.472151	0.535104	1.57384	0	1.10788	0.0180749
Zak	-0.566581	0.723965	2.17189	0	1.10679	0.0171412
Arrb1	-0.818395	0.723965	2.58109	0	1.10427	0.0169564
Dgcr2	-0.881348	0.818395	2.54961	0	1.10423	0.0169564
Lgi1	-4.12345	1.13316	6.32682	0	1.10376	0.0169564
Creb3	-0.409197	0.503628	1.3535	0	1.10301	0.0169564
Ggnbp2os	-1.19612	1.32202	3.71425	0	1.1028	0.0169564
Nsmce2	-1.00726	1.29055	3.21063	0	1.10249	0.0169564
Fzd2	-0.377721	0.472151	1.29055	0	1.10184	0.0168357
Gbp7	-0.912825	0.944302	5.88615	0	1.10177	0.0168357
Rasgrp1	-1.00726	0.975778	3.74573	0	1.10141	0.0166238
Tmco1	-0.346244	0.440674	1.07021	0	1.09994	0.015744
Hyi	-0.0629534	0	6.10648	0	1.09804	0.0144615
BC002163	-0.283291	0.377721	0.975778	0	1.09715	0.0143346
Cyp2e1	-0.283291	0.346244	0.944302	0	1.09671	0.0142794
Arl2bp	-0.723965	0.786918	2.2978	0	1.09503	0.0125647
Zfp113	-3.77721	0.409197	0.975778	0	1.09464	0.0125647
Ifi27	-0.472151	0.535104	1.29055	0	1.09419	0.0125647
Hnrnpu	-0.409197	0.503628	1.22759	0	1.09418	0.0125647
Pacsin3	-0.629534	0.692488	2.01451	0	1.09349	0.0125647
Yars	-0.755441	0.975778	2.76995	0	1.09293	0.0125647
Zfp622	-1.13316	1.41645	3.21063	0	1.09226	0.0125647
Sox5	-0.944302	1.19612	3.02177	0	1.09203	0.0125647
Zfp827	-0.251814	0.220337	3.39949	0	1.09175	0.0124096
Mllt1	-0.629534	0	6.92488	0	1.09105	0.012352
Rpp25l	-1.03873	1.3535	3.21063	0	1.09056	0.012352
Teddm1b	-3.99754	0.377721	0.849872	0	1.09045	0.012352
Sox13	-0.849872	0	6.01205	0	1.08969	0.012352
Derl2	-0.377721	0.440674	1.10169	0	1.08817	0.00973822
Far1	-0.975778	1.03873	3.39949	0	1.08633	0.00872738
1700123O20Rik	-0.881348	0.849872	2.26632	0	1.08562	0.00872738
Cystm1	-0.314767	0.377721	0.944302	0	1.08556	0.00872738
Gtf3c1	-4.50117	0.157384	6.70454	0	1.08353	0.00872738
Fth1	-0.18886	0.220337	0.629534	0	1.08243	0.00872738
Smco1	-0.472151	0.346244	5.19366	0	1.08222	0.00872738
Gm14440	-0.346244	0.377721	0.944302	0	1.08191	0.00872738
Nfyc	-1.03873	1.29055	3.61982	0	1.08168	0.00872738
Slc7a2	-0.440674	0.535104	1.41645	0	1.08072	0.00872738
Casc4	-0.283291	0.314767	0.881348	0	1.08009	0.0085264
Nosip	-0.755441	0.849872	2.07746	0	1.07893	0.00781458
Zfp58	-4.40674	0.18886	5.98058	0	1.07761	0.00641333
Trim13	-0.251814	0	6.61011	0	1.07679	0.00565313
Iws1	-1.69974	0.723965	4.78446	0	1.07413	0.0026726
Pfas	-0.314767	0.377721	1.07021	0	1.0734	0.00203257
Plekhb2	-0.723965	0.535104	2.80143	0	1.07254	0.00108124
Nmrk1	-0.283291	0.314767	0.881348	0	1.07237	0.00108124
9430091E24Rik	-3.77721	0.220337	0.912825	0	1.07036	0
Zfp160	-3.93459	0.251814	6.13796	0	1.06987	0
Spag8	-0.125907	0.0629534	5.16218	0	1.06877	0
Fam171b	-0.440674	0.472151	1.19612	0	1.06854	0
Zc3h12a	-0.661011	0.786918	2.51814	0	1.0672	0
Tmem53	-1.10169	1.03873	7.01931	0	1.06662	0
Pola2	-0.251814	0.283291	0.786918	0	1.06593	0
Slc39a1	-0.251814	0.314767	0.849872	0	1.06592	0
Btbd17	-0.283291	0.314767	0.881348	0	1.0652	0
2810474O19Rik	-2.83291	3.6513	5.79172	0	1.06502	0
Ephb1	-1.13316	1.25907	2.73848	0	1.06463	0
Ceacam2	-0.18886	0.157384	0.692488	0	1.06423	0
Fkbp4	-0.472151	0.503628	1.32202	0	1.06268	0
Higd1a	-0.377721	0.409197	1.07021	0	1.06267	0
Ubiad1	-1.07021	0.786918	7.05079	0	1.06237	0
Gm17644	-0.346244	0.409197	1.07021	0	1.06134	0
Mrps12	-0.598058	0.598058	2.10894	0	1.06081	0
Mapk1ip1l	-1.44793	0.723965	4.65856	0	1.0602	0
Nop10	-0.503628	0.503628	1.47941	0	1.05958	0
Ppp4r1	-4.43822	0	7.11374	0	1.05906	0
Tollip	-0.818395	0.692488	1.79417	0	1.05894	0
Hspa2	-0.661011	0.692488	1.54236	0	1.05893	0
Mief1	-3.55687	0.723965	5.16218	0	1.0575	0
Zfp653	-3.33653	0.220337	5.79172	0	1.05544	0
Nmnat1	-0.346244	0	6.61011	0	1.05399	0
Pitpnb	-1.10169	1.19612	3.21063	0	1.05352	0
Mbnl1	-2.39223	0.472151	3.6513	0	1.05316	0
4930504C09Rik	-0.440674	0.220337	2.76995	0	1.05267	0
Alpl	-0.881348	0.723965	2.99029	0	1.05147	0
Scrg1	-0.283291	0.314767	0.849872	0	1.05115	0
Lman2	-0.503628	0.503628	1.22759	0	1.05081	0
Myl6b	-0.18886	0.157384	0.661011	0	1.04992	0
Hacd2	-0.283291	0.314767	0.881348	0	1.04872	0
Nav1	-3.71425	0.755441	5.35104	0	1.04836	0
Rfwd3	-1.03873	1.00726	4.78446	0	1.04768	0
2020-09-02	-0.346244	0.377721	1.07021	0	1.04665	0
Ifnar2	-1.00726	1.10169	3.1162	0	1.04633	0
Ahctf1	-1.44793	1.00726	6.57864	0	1.04481	0
Pik3c2a	-4.12345	0.346244	0.818395	0	1.04462	0
Ftx	-3.05324	5.19366	5.9491	0	1.04363	0
Ndufb10	-0.283291	0.314767	0.818395	0	1.04101	0
Rpl10	-0.472151	0.472151	1.22759	0	1.04024	0
Klhl7	-0.440674	0.472151	1.25907	0	1.03837	0
Adam23	-0.377721	0.409197	1.10169	0	1.0375	0
Caln1	-0.18886	0.125907	0.629534	0	1.03636	0
Ndufa12	-0.251814	0.283291	0.818395	0	1.03462	0
St6galnac5	-1.10169	1.03873	7.05079	0	1.03389	0
Nck1	-4.24936	0	5.85467	0	1.03327	0
Uba5	-1.13316	1.07021	7.08226	0	1.03264	0
Rplp2-ps1	-0.283291	0.283291	0.818395	0	1.03071	0
Calu	-0.598058	0.535104	1.44793	0	1.03066	0
4930483J18Rik	-0.157384	0.125907	0.598058	0	1.0299	0
Sfpq	-0.283291	0.314767	0.881348	0	1.02841	0
Gm10408	-1.03873	1.10169	2.73848	0	1.02826	0
Ccdc153	-0.377721	0.18886	3.84016	0	1.02782	0
Herc1	-1.32202	1.41645	3.21063	0	1.02752	0
Naip5	-1.13316	1.07021	4.24936	0	1.02711	0
Avl9	-1.16464	1.00726	6.26387	0	1.02708	0
Ube2d2a	-0.409197	0.440674	1.13316	0	1.02681	0
Entpd1	-1.3535	1.19612	6.51568	0	1.02633	0
Ikbkb	-1.03873	1.07021	3.14767	0	1.0263	0
Eef1g	-0.503628	0.503628	1.25907	0	1.02585	0
Adora2b	-0.818395	0.692488	1.73122	0	1.02481	0
Ccdc34	-1.32202	1.51088	3.05324	0	1.02471	0
Zfp1	-0.251814	0.18886	5.38252	0	1.02446	0
Rom1	-3.61982	0.0314767	6.16944	0	1.02215	0
Smim3	-0.944302	0.692488	1.7627	0	1.02111	0
Platr17	-0.598058	0.440674	5.06775	0	1.01914	0
Zcchc3	-1.41645	1.00726	6.7675	0	1.01713	0
Rac2	-0.849872	1.07021	3.30506	0	1.01675	0
Slmap	-1.19612	1.29055	3.43096	0	1.01608	0
Mrps18c	-0.472151	0.472151	1.25907	0	1.01535	0
AU018091	-0.283291	0.251814	1.16464	0	1.01482	0
Lrp8	-2.48666	1.38498	5.88615	0	1.01462	0
Fam69c	-0.755441	0.723965	2.04599	0	1.01327	0
Trip10	-3.05324	0.0314767	5.9491	0	1.01326	0
Rbbp4	-0.472151	0.503628	1.41645	0	1.01318	0
Scfd1	-1.07021	1.19612	3.21063	0	1.01229	0
Adamts5	-3.21063	5.5399	6.01205	0	1.01176	0
Pcdh15	-0.314767	0.220337	1.60531	0	1.0114	0
Prkra	-1.13316	0.881348	6.61011	0	1.01085	0
Rbm25	-0.786918	0.692488	1.92008	0	1.01022	0
Tcte1	-0.157384	0.125907	0.629534	0	1.01022	0
Garem	-4.0605	0	6.73602	0	1.01001	0
Ascl4	-0.692488	0.723965	1.85713	0	1.00767	0
Crispld2	-0.283291	0.157384	5.79172	0	1.00633	0
Enpp2	-0.881348	0.944302	2.42371	0	1.0062	0
Ankfy1	-2.92734	0.440674	4.40674	0	1.00564	0
Abhd5	-1.10169	1.13316	2.92734	0	1.00354	0
Enpp5	-0.472151	0.472151	1.25907	0	1.003	0
Med23	-4.31231	0.314767	6.13796	0	1.00268	0
0610009B22Rik	-0.598058	0.535104	1.73122	0	1.00224	0
Tnrc18	-0.849872	0.0944302	3.99754	0	1.00198	0
Bbx	-3.71425	0.125907	5.88615	0	1.0019	0
Rsrc2	-0.786918	0.661011	1.54236	0	1.00124	0
Gm12942	-1.25907	1.03873	6.86193	0	1.00109	0
BC037034	-0.944302	0	6.23239	0	0.998771	0
Thoc5	-3.99754	0.472151	6.38978	0	0.997357	0
Rab7	-0.377721	0.377721	1.07021	0	0.996563	0
Ghitm	-0.377721	0.377721	1.03873	0	0.994745	0
Snhg20	-0.314767	0.314767	0.944302	0	0.994709	0
2020-03-05	-0.346244	0.346244	0.975778	0	0.994342	0
Msh6	-4.40674	0.220337	1.63679	0	0.994252	0
Cbx5	-0.440674	0.440674	1.22759	0	0.993239	0
Tma7	-0.472151	0.440674	1.13316	0	0.993132	0
Rrp7a	-0.912825	0.849872	3.39949	0	0.992877	0
Idnk	-1.10169	0.598058	4.1864	0	0.992736	0
D5Ertd615e	-0.598058	0.503628	4.65856	0	0.991625	0
Exosc4	-0.314767	0.314767	0.912825	0	0.989594	0
Sycp3	-1.95156	1.41645	3.6513	0	0.988777	0
Cyb561a3	-2.99029	0.818395	3.33653	0	0.987543	0
Usp48	-1.19612	1.25907	3.30506	0	0.987079	0
Polk	-0.377721	0.0944302	6.04353	0	0.985767	0
Hoxc8	-0.251814	0.18886	1.10169	0	0.984247	0
Scp2	-0.314767	0.314767	0.881348	0	0.983083	0
Kpnb1	-4.78446	1.8886	4.43822	0	0.983059	0
Gls	-2.2978	2.36075	6.10648	0	0.982529	0
Fam177a	-1.92008	0.598058	2.707	0	0.981567	0
Prdm9	-0.283291	0.220337	1.29055	0	0.981244	0
Bccip	-1.07021	0.912825	3.27358	0	0.980884	0
Acads	-1.00726	0.912825	3.08472	0	0.980628	0
Men1	-1.07021	1.07021	6.38978	0	0.980267	0
Slmo2	-0.912825	0.692488	2.45518	0	0.979789	0
Rpl18a	-0.314767	0.314767	0.912825	0	0.979183	0
Sec61a1	-0.598058	0.503628	1.51088	0	0.978	0
Wbp1l	-1.13316	0.881348	2.95881	0	0.977364	0
4930452N14Rik	-0.472151	0.251814	1.66827	0	0.976832	0
Tmem33	-0.440674	0.409197	1.10169	0	0.97672	0
Mrpl18	-0.535104	0.503628	1.38498	0	0.97666	0
Urod	-1.07021	0.755441	2.07746	0	0.974053	0
Ubxn7	-3.08472	6.07501	6.38978	0	0.973409	0
Unc13a	-0.220337	0.0944302	4.81594	0	0.972479	0
Bdp1	-3.27358	0	6.48421	0	0.971738	0
Ube2z	-1.47941	0	6.29534	0	0.970683	0
Acot11	-0.755441	0.629534	2.39223	0	0.97029	0
Pla2g4b	-4.02902	0.503628	4.75299	0	0.970279	0
Ccdc115	-3.33653	-0.0314767	6.45273	0	0.969615	0
Dnajc28	-0.125907	0	7.11374	0	0.968248	0
Nfe2l1	-3.58835	-0.0629534	6.51568	0	0.967758	0
Bloc1s3	-1.47941	1.03873	4.65856	0	0.966662	0
Gstt1	-0.692488	0.598058	1.51088	0	0.966588	0
Tmem206	-0.314767	0.283291	0.849872	0	0.964619	0
Gm561	-1.54236	0.881348	3.68278	0	0.963599	0
H2-T23	-0.283291	0.283291	0.786918	0	0.962912	0
Tbc1d13	-1.22759	0.125907	5.76024	0	0.961382	0
Cry2	-0.755441	0.723965	1.92008	0	0.961169	0
Arhgef6	-3.68278	0.0314767	6.01205	0	0.960732	0
Erp44	-0.535104	0.472151	1.19612	0	0.960697	0
Thbs4	-3.96607	0.0314767	5.85467	0	0.960438	0
Hnrnph1	-0.440674	0.440674	1.25907	0	0.96031	0
Slc25a33	-0.503628	0.440674	1.32202	0	0.959802	0
Rnmtl1	-4.72151	0.0314767	6.73602	0	0.959778	0
Prdm5	-4.37526	0.125907	5.35104	0	0.959752	0
Ufd1l	-0.566581	0.535104	1.54236	0	0.958701	0
Slc37a4	-1.19612	1.16464	3.1162	0	0.958075	0
Parn	-1.13316	0.755441	5.31957	0	0.957877	0
1700047I17Rik2	-1.54236	0.566581	2.54961	0	0.957751	0
Actr10	-0.314767	0.314767	0.912825	0	0.95634	0
Tra2b	-0.503628	0.472151	1.25907	0	0.955418	0
Tyms	-2.89586	3.84016	4.69003	0	0.954031	0
Nim1k	-0.629534	0.535104	1.57384	0	0.95322	0
Cyth3	-3.58835	0	6.48421	0	0.953187	0
Slc25a14	-4.62708	0	6.79897	0	0.952764	0
Nudt7	-0.944302	0.723965	2.45518	0	0.952632	0
Bckdhb	-0.566581	0.503628	1.47941	0	0.952261	0
Tti2	-2.83291	3.39949	5.03628	0	0.952198	0
Cryzl1	-0.786918	0.598058	1.66827	0	0.951855	0
Kcnn3	-0.566581	0.472151	1.38498	0	0.951821	0
Pkia	-3.71425	1.22759	5.57138	0	0.94829	0
Sec16a	-4.75299	0.125907	5.414	0	0.947849	0
Tfb2m	-1.60531	1.44793	3.6513	0	0.947751	0
Brinp3	-1.13316	1.00726	3.05324	0	0.946876	0
1110004F10Rik	-0.409197	0.377721	1.13316	0	0.94513	0
Insig2	-1.10169	0.881348	2.67552	0	0.944804	0
Tspan5	-1.13316	1.07021	3.36801	0	0.944706	0
Nupr1l	-0.125907	0	5.72876	0	0.943321	0
Zfp738	-4.02902	0.0314767	2.80143	0	0.941098	0
Lrpap1	-0.377721	0.346244	0.975778	0	0.940257	0
Rspo3	-0.0944302	0	6.29534	0	0.940171	0
Lrrc4c	-2.54961	6.16944	6.67307	0	0.938874	0
Ccdc101	-3.90311	-0.0314767	6.83045	0	0.938326	0
Ppp2r2b	-0.566581	0.503628	1.41645	0	0.937935	0
Cbr1	-0.598058	0.440674	1.13316	0	0.937845	0
Med4	-1.22759	1.10169	3.02177	0	0.937611	0
Papss1	-0.723965	0.566581	1.7627	0	0.937328	0
Rnf215	-1.00726	0.692488	1.95156	0	0.936316	0
Eml4	-4.24936	0	2.80143	0	0.935973	0
Psmc4	-0.440674	0.377721	1.00726	0	0.93469	0
Zfp445	-1.22759	1.07021	6.01205	0	0.933247	0
Atp6v0e	-0.314767	0.283291	0.818395	0	0.933089	0
Hsd17b10	-0.535104	0.440674	1.22759	0	0.932609	0
Atad1	-0.661011	0.535104	1.41645	0	0.932026	0
Ybx1	-0.503628	0.440674	1.16464	0	0.931815	0
Tmem121	-4.56413	0.0629534	5.79172	0	0.93159	0
Stk38	-1.00726	0.818395	2.58109	0	0.928933	0
Id4	-0.314767	0.283291	0.881348	0	0.927132	0
Tspan10	-0.220337	0.157384	0.723965	0	0.925541	0
Setd7	-3.27358	2.99029	6.01205	0	0.925171	0
Tmed5	-0.377721	0.314767	0.881348	0	0.924961	0
Ap4s1	-1.19612	0.912825	3.17915	0	0.924557	0
Pik3c2b	-0.377721	0.220337	1.66827	0	0.924001	0
Fam120aos	-0.786918	0.566581	1.51088	0	0.923789	0
Mrpl35	-0.723965	0.503628	1.54236	0	0.923642	0
Efhd2	-0.566581	0.440674	1.60531	0	0.921636	0
Xpc	-0.157384	0	6.42125	0	0.921589	0
Chrac1	-1.47941	1.07021	6.98783	0	0.92139	0
Gin1	-4.09197	0	6.38978	0	0.920356	0
Phip	-0.912825	0.629534	2.48666	0	0.918149	0
Plekhg2	-0.125907	0	5.44547	0	0.917824	0
Psmd14	-0.692488	0.503628	1.47941	0	0.916467	0
Ssrp1	-1.22759	1.07021	3.27358	0	0.916213	0
Dbnl	-1.29055	1.54236	2.89586	0	0.9158	0
Rab34	-0.881348	0.598058	1.69974	0	0.914461	0
Wfdc13	-0.18886	0.0944302	0.661011	0	0.914057	0
Rlbp1	-1.16464	0.818395	2.80143	0	0.913811	0
Lgals8	-1.41645	1.22759	3.52539	0	0.913393	0
Pdia3	-0.346244	0.283291	0.849872	0	0.911816	0
Phf21b	-0.377721	-0.0629534	6.23239	0	0.91165	0
Aplp1	-0.314767	0.283291	0.818395	0	0.911385	0
Galnt18	-1.13316	1.03873	2.99029	0	0.911276	0
Dynll2	-3.87164	0	6.54716	0	0.910865	0
Ctsb	-0.251814	0.220337	0.629534	0	0.910303	0
Tmem128	-0.912825	0.629534	1.54236	0	0.909044	0
Tmem263	-0.472151	0.409197	1.22759	0	0.908529	0
Tcf12	-1.29055	1.19612	3.05324	0	0.907894	0
Pnrc1	-1.22759	1.13316	2.99029	0	0.906467	0
Pou3f1	-0.314767	0.18886	1.38498	0	0.905951	0
Stambpl1	-1.3535	1.19612	3.08472	0	0.90538	0
Cyp2j13	-0.314767	0.220337	1.63679	0	0.904441	0
Vmn1r63	-0.18886	0.125907	0.723965	0	0.903318	0
Sord	-1.32202	0.818395	2.80143	0	0.903272	0
C87436	-1.51088	0.629534	6.70454	0	0.902588	0
Rab33b	-0.377721	0.346244	1.07021	0	0.898793	0
Prkar1a	-0.440674	0.346244	0.975778	0	0.897642	0
Zfp119a	-0.18886	0.0944302	1.03873	0	0.896995	0
Trappc8	-0.18886	0.0314767	5.88615	0	0.896642	0
Dus2	-3.84016	-0.0314767	6.7675	0	0.896548	0
Atp1a4	-0.409197	0.18886	1.73122	0	0.896369	0
Gm10785	-0.723965	0.598058	1.7627	0	0.896279	0
Rab14	-0.440674	0.377721	1.00726	0	0.896191	0
Hnrnpd	-2.17189	0.786918	4.40674	0	0.895728	0
Crim1	-2.92734	2.92734	5.76024	0	0.895158	0
Ubr5	-1.25907	0.849872	2.707	0	0.895049	0
D230025D16Rik	-4.31231	0	6.3583	0	0.894893	0
Fkbp2	-0.598058	0.440674	1.29055	0	0.894577	0
Mapk9	-4.69003	0	6.61011	0	0.894184	0
Sp3	-2.2978	0.661011	4.0605	0	0.893681	0
Brd1	-1.41645	0.0629534	6.32682	0	0.891965	0
Gemin8	-3.6513	0.472151	4.31231	0	0.891451	0
Med22	-1.07021	0.912825	3.05324	0	0.890327	0
Rhoq	-2.73848	-0.0314767	6.23239	0	0.890325	0
Npat	-4.1864	-0.0314767	6.64159	0	0.88996	0
Bptf	-3.43096	5.09923	6.45273	0	0.889763	0
Ttc17	-1.16464	0.881348	3.17915	0	0.889276	0
Sec61g	-0.440674	0.346244	1.03873	0	0.888683	0
A730017L22Rik	-3.68278	4.37526	5.0048	0	0.887229	0
Zranb2	-0.692488	0.535104	1.32202	0	0.887002	0
Dera	-1.16464	0.818395	3.02177	0	0.886756	0
Ppp1r8	-1.29055	0.692488	6.3583	0	0.886584	0
Mitf	-0.18886	0.0944302	0.598058	0	0.886574	0
Gnl1	-1.51088	1.03873	5.72876	0	0.886085	0
Vkorc1l1	-3.2421	0.0314767	6.16944	0	0.885843	0
Zcchc17	-1.22759	1.07021	3.05324	0	0.885542	0
Cadm1	-0.377721	0.314767	0.912825	0	0.88455	0
Pdzph1	-0.377721	0.314767	0.944302	0	0.884229	0
Gpx8	-0.975778	0.598058	1.54236	0	0.883084	0
Lmbrd1	-0.377721	0.314767	1.03873	0	0.882471	0
Unc13c	-2.67552	1.16464	2.17189	0	0.88214	0
Gpt	-1.10169	0.786918	2.76995	0	0.88175	0
Hspa5	-0.346244	0.283291	0.849872	0	0.880979	0
Slc43a2	-0.912825	0.629534	2.61257	0	0.880468	0
Sbds	-0.661011	0.472151	1.22759	0	0.879399	0
Adgrb1	-1.95156	1.38498	3.99754	0	0.879298	0
2810459M11Rik	-1.38498	0.818395	6.79897	0	0.878409	0
Apoa1bp	-0.409197	0.314767	0.912825	0	0.878274	0
Rpl13a	-0.440674	0.346244	0.975778	0	0.877896	0
Atp5f1	-0.314767	0.251814	0.786918	0	0.877238	0
Srp68	-1.29055	1.10169	3.21063	0	0.876815	0
Cmas	-4.37526	0.0314767	6.04353	0	0.875638	0
Fktn	-0.661011	0.440674	4.91037	0	0.875613	0
Dut	-1.29055	1.07021	3.49392	0	0.875594	0
Gid8	-0.377721	0.314767	0.944302	0	0.875189	0
Gskip	-4.84742	-0.0314767	7.11374	0	0.874036	0
Rps14	-0.377721	0.314767	0.912825	0	0.873995	0
Padi4	-0.283291	0.157384	3.21063	0	0.873134	0
She	-0.283291	0.18886	0.723965	0	0.872918	0
Ggact	-0.377721	0.314767	0.912825	0	0.872362	0
Tapbp	-0.598058	0.472151	1.3535	0	0.871414	0
Sumf2	-0.472151	0.346244	0.975778	0	0.87139	0
Dnaja3	-1.10169	0.849872	2.39223	0	0.871295	0
Negr1	-1.22759	0.818395	3.58835	0	0.871081	0
Ppp1r3g	-0.723965	0.503628	1.44793	0	0.870806	0
Arhgap12	-1.19612	0.849872	2.42371	0	0.869366	0
Dohh	-1.22759	0.975778	3.21063	0	0.867391	0
C030029H02Rik	-0.723965	0.503628	1.85713	0	0.867093	0
Arpc4	-0.566581	0.409197	1.19612	0	0.866819	0
G530011O06Rik	-0.912825	0.598058	1.66827	0	0.866805	0
Rad18	-3.87164	0.0629534	0.786918	0	0.866126	0
Zscan26	-0.346244	0.251814	0.849872	0	0.865832	0
Aldh6a1	-0.377721	0.283291	0.912825	0	0.864855	0
Med27	-1.10169	0.723965	2.99029	0	0.863875	0
Sft2d2	-0.944302	0.692488	2.01451	0	0.863622	0
Ptchd4	-0.251814	0.0944302	0.566581	0	0.863137	0
5330426P16Rik	-4.37526	0.0629534	5.5399	0	0.862823	0
Efr3b	-0.755441	0.535104	1.73122	0	0.862808	0
Brsk2	-0.18886	0.0944302	4.40674	0	0.862303	0
Ttyh3	-0.377721	0.314767	0.944302	0	0.861903	0
Ric8b	-4.31231	1.44793	3.1162	0	0.861862	0
Cript	-0.661011	0.472151	1.3535	0	0.861492	0
Gnl2	-1.29055	1.03873	2.95881	0	0.861169	0
Selenbp2	-0.692488	0.661011	2.48666	0	0.860773	0
Cpne8	-0.377721	0.283291	0.849872	0	0.859709	0
Rrp8	-2.39223	0.849872	5.69729	0	0.857272	0
Rnmt	-4.1864	0	6.45273	0	0.85655	0
Als2cl	-1.44793	0.629534	1.69974	0	0.854993	0
Patz1	-1.38498	1.10169	3.14767	0	0.854788	0
Szt2	-4.40674	0	6.48421	0	0.854406	0
Aph1c	-3.71425	0.0944302	5.85467	0	0.854351	0
Rangrf	-1.25907	0.723965	2.61257	0	0.854217	0
Iba57	-0.220337	0.0944302	1.25907	0	0.853824	0
Per3	-0.377721	0.314767	1.00726	0	0.852709	0
Manea	-1.07021	0.755441	1.82565	0	0.852412	0
H2-Q10	-0.283291	0.18886	1.22759	0	0.850902	0
Hist1h2be	-2.86438	0.692488	5.16218	0	0.850756	0
Fign	-2.95881	0.251814	1.60531	0	0.850725	0
Ccm2	-1.3535	0.912825	3.33653	0	0.850717	0
Tardbp	-0.818395	0.535104	1.92008	0	0.84989	0
Rad50	-0.125907	0.0314767	5.72876	0	0.849525	0
Cox6c	-0.314767	0.251814	0.755441	0	0.849461	0
B020004C17Rik	-0.314767	0.18886	1.25907	0	0.849357	0
Ubr7	-1.19612	0.975778	2.99029	0	0.849226	0
2610035D17Rik	-1.3535	1.13316	3.2421	0	0.848952	0
Ppp2r2d	-3.87164	0	6.57864	0	0.848461	0
Snx11	-4.53265	0.0314767	6.45273	0	0.848262	0
Iqcb1	-3.90311	0	6.45273	0	0.848107	0
Pigv	-0.535104	0.377721	1.16464	0	0.847333	0
Morc3	-4.34379	0.0314767	6.3583	0	0.847277	0
Ddx51	-3.87164	0.0944302	5.28809	0	0.84624	0
Arl14ep	-1.47941	0.881348	3.52539	0	0.845778	0
Ruvbl2	-1.38498	0.975778	3.02177	0	0.845471	0
Maged1	-0.849872	0.503628	1.3535	0	0.84455	0
A330069E16Rik	-3.90311	0.503628	4.87889	0	0.843942	0
Scamp3	-0.723965	0.472151	1.38498	0	0.843618	0
Grpel1	-0.598058	0.409197	1.32202	0	0.843205	0
Zfp949	-0.535104	0.0314767	6.04353	0	0.842976	0
5430440P10Rik	-0.251814	0.157384	0.661011	0	0.842262	0
Arpc5	-0.723965	0.503628	1.47941	0	0.84209	0
Snrnp27	-0.849872	0.566581	1.44793	0	0.841422	0
Dpf2	-0.975778	0.535104	2.36075	0	0.841154	0
Tsc22d1	-0.440674	0.314767	1.07021	0	0.840912	0
Wdr48	-1.03873	0.755441	2.86438	0	0.84085	0
Tmem147	-0.472151	0.346244	1.00726	0	0.840661	0
Rabgap1	-1.47941	0.944302	3.39949	0	0.840536	0
St3gal5	-0.346244	0.125907	5.79172	0	0.840375	0
Edrf1	-0.157384	0	5.63433	0	0.839695	0
Chrdl1	-0.912825	0.566581	1.57384	0	0.839284	0
Flrt1	-2.39223	3.05324	4.78446	0	0.838419	0
Gatad1	-0.440674	0.314767	1.03873	0	0.838098	0
1700019D03Rik	-4.28083	0.0944302	6.16944	0	0.837347	0
Psma7	-0.409197	0.314767	0.975778	0	0.837083	0
Sptlc1	-1.00726	0.535104	2.73848	0	0.836712	0
Pcyox1l	-1.00726	0.818395	2.14042	0	0.836347	0
Lonp2	-0.598058	0.377721	1.19612	0	0.83579	0
Apeh	-1.29055	0.912825	2.89586	0	0.835065	0
Slc7a5	-1.79417	0.975778	6.98783	0	0.834647	0
Pde1b	-0.157384	0.0629534	5.25661	0	0.834074	0
Zfp277	-0.503628	0.346244	1.03873	0	0.833477	0
Dusp6	-0.818395	0.535104	2.01451	0	0.833123	0
Bcat2	-1.41645	1.13316	3.84016	0	0.832798	0
Ntrk2	-0.251814	0.18886	0.598058	0	0.832401	0
Tbx18	-0.251814	0.157384	4.69003	0	0.832005	0
Asph	-0.944302	0.692488	2.61257	0	0.831408	0
Rpl4	-0.377721	0.283291	0.912825	0	0.83075	0
Adam28	-0.692488	0.472151	1.79417	0	0.83005	0
Ostf1	-0.661011	0.377721	1.22759	0	0.829232	0
Pdcd11	-4.09197	0.283291	6.10648	0	0.828897	0
Baiap2	-0.251814	0	5.38252	0	0.828054	0
Gcdh	-1.22759	0.912825	3.02177	0	0.827775	0
Atad2	-0.849872	0.409197	5.06775	0	0.827462	0
Med1	-1.7627	0.535104	3.90311	0	0.827379	0
2020-09-06	-3.71425	0.251814	0.975778	0	0.827096	0
Mertk	-0.629534	0.472151	1.32202	0	0.827046	0
Scd2	-0.346244	0.251814	0.912825	0	0.826828	0
Plekha2	-0.440674	0.157384	3.68278	0	0.826283	0
Get4	-0.944302	0.535104	1.73122	0	0.825092	0
Cklf	-1.54236	0.755441	3.49392	0	0.82505	0
Cyp46a1	-0.723965	0.440674	1.32202	0	0.823933	0
Cdkal1	-0.377721	0.283291	0.849872	0	0.823481	0
Rasgrp2	-4.43822	0	6.42125	0	0.823028	0
Tmem69	-0.346244	0.251814	0.786918	0	0.822161	0
Gins4	-4.87889	-0.0629534	6.67307	0	0.822086	0
Msi2	-0.472151	0.346244	1.03873	0	0.821201	0
Mcat	-4.34379	0	6.51568	0	0.821161	0
Mtss1l	-0.535104	0.409197	1.25907	0	0.821073	0
Syt13	-0.346244	0.18886	1.63679	0	0.820815	0
Abhd17a	-2.51814	1.32202	5.85467	0	0.820525	0
Snord42a	-1.07021	0.692488	2.80143	0	0.818971	0
Casz1	-0.535104	0.18886	0.849872	0	0.818813	0
Nsg1	-1.22759	0.881348	3.05324	0	0.818542	0
Cacul1	-3.68278	0	1.38498	0	0.81852	0
Mrpl15	-0.818395	0.566581	1.54236	0	0.817982	0
Sorl1	-1.44793	1.10169	3.52539	0	0.816791	0
Cpne9	-0.346244	0.157384	3.17915	0	0.816739	0
Cnn2	-0.251814	0.157384	4.84742	0	0.816355	0
Fmr1	-4.0605	0.251814	6.16944	0	0.816111	0
Fstl1	-0.849872	0.440674	2.23485	0	0.815622	0
Nfat5	-0.786918	0.472151	1.38498	0	0.81559	0
Eif5	-0.377721	0.251814	0.849872	0	0.815411	0
Mcl1	-4.24936	0	6.10648	0	0.8147	0
Relb	-3.96607	0.125907	6.16944	0	0.814575	0
Phyhd1	-1.38498	1.03873	3.27358	0	0.814043	0
1700034H15Rik	-0.661011	0.314767	5.0048	0	0.813722	0
Znrf1	-4.5956	0.18886	6.3583	0	0.812608	0
Itgb1	-1.13316	0.723965	2.58109	0	0.812513	0
Acbd5	-1.00726	0.598058	2.26632	0	0.812377	0
Oas1b	-0.881348	0.0629534	5.0048	0	0.811998	0
Mrpl50	-1.38498	0.912825	3.1162	0	0.810539	0
Ptbp2	-2.95881	0.472151	6.54716	0	0.810148	0
Park7	-0.472151	0.314767	1.00726	0	0.810143	0
Rabif	-5.44547	1.22759	3.1162	0	0.809182	0
Tnfrsf10b	-4.0605	0.409197	1.07021	0	0.808686	0
Peli2	-3.80868	4.94185	6.07501	0	0.807646	0
Cd2ap	-3.99754	1.32202	4.12345	0	0.806796	0
Cebpz	-2.01451	1.22759	3.77721	0	0.806384	0
Iscu	-0.409197	0.283291	0.944302	0	0.805976	0
Nrxn1	-0.440674	0.314767	1.03873	0	0.80592	0
Plcb1	-4.65856	0	6.79897	0	0.804711	0
Taldo1	-0.535104	0.377721	1.13316	0	0.803922	0
Mgat4c	-4.02902	0	6.20091	0	0.802075	0
G630071F17Rik	-0.220337	0.125907	0.723965	0	0.800623	0
Tmprss11g	-0.251814	0.157384	0.881348	0	0.800204	0
Nhlh2	-0.346244	0.18886	1.41645	0	0.799129	0
Leprot	-1.51088	1.25907	2.92734	0	0.797911	0
Ptpn13	-1.07021	0.661011	2.51814	0	0.797583	0
Specc1	-1.3535	0.881348	3.30506	0	0.796263	0
Zfp148	-0.598058	0.0314767	5.9491	0	0.796077	0
Mknk1	-1.51088	0.661011	6.8934	0	0.795861	0
Psenen	-0.409197	0.283291	0.944302	0	0.795223	0
Fam81a	-4.15493	0.283291	5.91762	0	0.794323	0
Ptpn23	-4.65856	0.220337	0.881348	0	0.793152	0
Tnk1	-0.18886	0.0944302	0.661011	0	0.792828	0
1700088E04Rik	-4.81594	0	6.70454	0	0.792337	0
Acot7	-1.41645	0.944302	3.02177	0	0.791491	0
Wnt4	-0.566581	0.346244	4.84742	0	0.79093	0
Sp4	-1.3535	0	5.91762	0	0.789595	0
Ercc2	-4.65856	-0.0314767	6.48421	0	0.789262	0
Zfp821	-3.77721	0	5.28809	0	0.789137	0
Zmiz2	-4.09197	-0.0314767	6.26387	0	0.78898	0
Ociad1	-0.472151	0.314767	1.00726	0	0.788975	0
2900052N01Rik	-0.566581	0.377721	1.13316	0	0.788789	0
Wsb2	-3.39949	0	5.16218	0	0.788631	0
Pbld1	-0.346244	0.251814	0.818395	0	0.787007	0
Fam65a	-2.67552	0.629534	6.32682	0	0.78694	0
Ap3m1	-0.598058	0.377721	1.19612	0	0.7869	0
Mbd6	-4.5956	0	6.64159	0	0.785272	0
Lrrc4b	-1.32202	0.440674	2.707	0	0.784985	0
Rab1	-0.440674	0.283291	0.912825	0	0.78463	0
Fmo1	-0.975778	0.598058	1.7627	0	0.783591	0
D17H6S56E-5	-0.472151	0.314767	0.944302	0	0.782615	0
Sash1	-1.54236	0.566581	2.48666	0	0.782285	0
Tmem222	-0.786918	0.440674	1.32202	0	0.781616	0
Ptgr2	-0.755441	0.440674	1.38498	0	0.781247	0
Gm14322	-2.32928	0.535104	3.30506	0	0.780773	0
Carhsp1	-0.881348	0.535104	1.92008	0	0.780032	0
Il21	-0.220337	0.0944302	0.661011	0	0.779951	0
Rab3il1	-4.91037	0.0629534	6.54716	0	0.779329	0
Mamdc2	-4.46969	0	6.04353	0	0.778371	0
Dio2	-0.786918	0.440674	1.3535	0	0.777902	0
Hspd1	-0.723965	0.440674	1.41645	0	0.777274	0
Sugct	-1.3535	0.912825	2.89586	0	0.777075	0
Acvr1c	-0.251814	0.125907	0.629534	0	0.776126	0
H3f3b	-0.409197	0.283291	0.912825	0	0.775667	0
Stat3	-1.32202	0.912825	2.86438	0	0.775612	0
Foxf1	-0.220337	0.125907	0.598058	0	0.775423	0
Nufip1	-0.314767	0.0944302	1.10169	0	0.775117	0
Foxred2	-1.57384	0.786918	2.58109	0	0.775006	0
Sgip1	-1.03873	0.566581	2.42371	0	0.774726	0
Ei24	-1.25907	0.786918	2.95881	0	0.773447	0
Csnk2b	-0.629534	0.377721	1.3535	0	0.7734	0
Klf15	-0.692488	0.440674	1.47941	0	0.772808	0
Tars2	-4.84742	0.881348	6.38978	0	0.772633	0
Stxbp2	-4.1864	0.440674	4.53265	0	0.772375	0
Tifa	-1.07021	0.535104	2.14042	0	0.771965	0
Tmed4	-0.503628	0.314767	1.00726	0	0.771626	0
Nufip2	-0.661011	0.409197	1.38498	0	0.771111	0
Ap5m1	-4.65856	0	6.29534	0	0.769354	0
Hsbp1	-0.377721	0.251814	0.786918	0	0.769293	0
Elp3	-5.13071	0.0629534	6.51568	0	0.768053	0
A430078G23Rik	-3.21063	0.723965	4.84742	0	0.765844	0
Pgk1	-0.440674	0.283291	0.944302	0	0.764908	0
Prr11	-0.755441	0.440674	1.92008	0	0.763878	0
Ednrb	-0.440674	0.283291	0.849872	0	0.763035	0
Cox16	-1.38498	0.472151	2.17189	0	0.762806	0
Serbp1	-0.440674	0.283291	1.03873	0	0.762089	0
B3glct	-1.47941	0.692488	3.27358	0	0.761199	0
Nucks1	-2.14042	0.975778	4.87889	0	0.760543	0
Dusp8	-0.440674	0.220337	0.723965	0	0.760139	0
Shisa2	-1.38498	0.849872	3.02177	0	0.759693	0
Wdr55	-0.220337	0.0629534	0.692488	0	0.759657	0
D8Ertd738e	-0.472151	0.283291	0.912825	0	0.759307	0
F730035M05Rik	-0.503628	0.18886	1.60531	0	0.759177	0
Flna	-5.28809	-0.0314767	6.92488	0	0.759144	0
4933431E20Rik	-0.629534	0.409197	1.29055	0	0.757969	0
Copz1	-0.598058	0.377721	1.19612	0	0.757913	0
Bri3	-1.95156	0.755441	6.8934	0	0.757414	0
Dcaf12l2	-0.251814	0.0944302	0.598058	0	0.756824	0
Siah1a	-4.50117	0.157384	6.64159	0	0.756763	0
Churc1	-0.377721	0.251814	0.818395	0	0.756244	0
Exosc2	-0.409197	0.251814	0.881348	0	0.755069	0
Ddx21	-3.61982	-0.0314767	5.5399	0	0.754648	0
Vps13d	-3.99754	1.69974	5.63433	0	0.754276	0
Megf9	-3.80868	0	5.22514	0	0.753865	0
Pars2	-4.09197	0	5.13071	0	0.753821	0
Tead1	-3.58835	0.0314767	6.16944	0	0.753797	0
Tmem254b	-1.10169	0.598058	2.10894	0	0.753593	0
Rps19	-0.503628	0.314767	0.944302	0	0.752988	0
Figf	-0.157384	0	4.72151	0	0.75138	0
Tarsl2	-4.43822	0	6.07501	0	0.751083	0
Stat5b	-4.75299	0.251814	6.07501	0	0.75057	0
Vegfa	-0.598058	0.377721	1.13316	0	0.748904	0
Irgm1	-2.07746	0.598058	3.49392	0	0.748705	0
Ugcg	-0.220337	0.0629534	2.20337	0	0.748448	0
Irak2	-0.755441	0.472151	1.57384	0	0.74635	0
A630075F10Rik	-0.975778	0.629534	2.2978	0	0.744674	0
Pdcl3	-1.38498	0.692488	2.86438	0	0.743957	0
Srsf2	-0.377721	0.251814	0.818395	0	0.743643	0
Yae1d1	-1.29055	0.723965	2.86438	0	0.743636	0
Vmn2r-ps129	-4.09197	0.377721	5.0048	0	0.743403	0
Ivns1abp	-1.22759	0.629534	2.2978	0	0.743377	0
l7Rn6	-0.786918	0.472151	1.66827	0	0.743351	0
Atp5g3	-0.377721	0.220337	0.818395	0	0.742931	0
Actn4	-1.03873	0.535104	2.42371	0	0.742871	0
Atxn2	-2.14042	0.944302	3.27358	0	0.742091	0
Vps35	-0.818395	0.440674	1.32202	0	0.74092	0
Brd7	-1.63679	0.786918	3.08472	0	0.740904	0
Zfyve16	-0.629534	-0.0314767	5.98058	0	0.740615	0
Cwc15	-0.786918	0.440674	1.29055	0	0.740379	0
St7l	-1.03873	0.503628	1.82565	0	0.739705	0
Tmed10	-0.409197	0.251814	0.818395	0	0.738801	0
Snrpd2	-1.25907	0.535104	2.54961	0	0.738533	0
Anapc2	-1.29055	0.786918	2.2978	0	0.738293	0
Tmem252	-0.220337	0.0944302	0.535104	0	0.737557	0
Sms	-3.55687	0	5.9491	0	0.737497	0
2020-03-07	-1.7627	1.03873	3.52539	0	0.735833	0
Ttc9c	-1.41645	0.346244	4.1864	0	0.73499	0
Tfrc	-1.13316	0.661011	1.69974	0	0.733157	0
Zdhhc20	-2.707	0.472151	3.55687	0	0.732961	0
Tmem109	-0.786918	0.377721	1.38498	0	0.732626	0
Lamtor2	-0.629534	0.346244	1.19612	0	0.732613	0
Vmn2r55	-0.755441	0.440674	1.73122	0	0.731881	0
Gmfb	-1.19612	0.692488	2.51814	0	0.7316	0
Bola2	-1.03873	0.472151	2.2978	0	0.731213	0
Zcrb1	-0.692488	0.346244	1.32202	0	0.730551	0
Exoc5	-3.74573	0.881348	4.46969	0	0.73054	0
Raph1	-4.34379	0.283291	1.10169	0	0.73042	0
Alg6	-3.87164	0.566581	4.31231	0	0.730092	0
Zbtb14	-4.75299	0.0629534	6.48421	0	0.72988	0
Clcc1	-0.755441	0.409197	1.29055	0	0.729452	0
Gm14325	-2.32928	0.409197	1.51088	0	0.729277	0
Hnrnpl	-0.346244	0.220337	0.723965	0	0.728397	0
Ndufs6	-0.440674	0.251814	0.881348	0	0.728266	0
Umps	-0.598058	0	6.20091	0	0.727435	0
G6pdx	-1.13316	0.566581	2.17189	0	0.727341	0
Ramp2	-5.35104	1.38498	3.08472	0	0.726725	0
5031434O11Rik	-0.125907	0	5.22514	0	0.725642	0
Tufm	-1.03873	0.566581	2.51814	0	0.725493	0
Maml1	-4.31231	0.0314767	3.14767	0	0.725332	0
Poldip2	-1.22759	0.692488	2.10894	0	0.725291	0
Saraf	-0.346244	0.220337	0.692488	0	0.724318	0
Bcl2l1	-1.19612	0.440674	1.69974	0	0.723198	0
Slc16a1	-1.3535	0.755441	2.32928	0	0.722927	0
Gm10190	-0.786918	0.409197	2.17189	0	0.722586	0
Twf1	-0.566581	0.346244	1.00726	0	0.721947	0
Esyt2	-4.87889	0.0629534	6.61011	0	0.721764	0
Eif1ad	-1.29055	0.755441	2.73848	0	0.721685	0
Diap3	-2.14042	1.22759	3.80868	0	0.721581	0
Cebpb	-0.251814	0.0944302	0.629534	0	0.720843	0
Mrpl32	-1.60531	0.503628	2.73848	0	0.720649	0
Rarres1	-1.51088	0.535104	6.20091	0	0.719869	0
Dpysl4	-5.06775	0	7.01931	0	0.719854	0
Tmco3	-0.440674	0.251814	0.881348	0	0.719528	0
Pwwp2a	-4.0605	3.58835	4.5956	0	0.719192	0
Otub2	-0.251814	0	6.07501	0	0.719189	0
Map9	-0.566581	0.0314767	6.07501	0	0.718579	0
Nr1h3	-0.18886	0	6.38978	0	0.71745	0
Sco2	-1.41645	0.723965	3.14767	0	0.716383	0
Cdh11	-0.944302	0.566581	1.63679	0	0.715467	0
Uqcc2	-0.535104	0.283291	1.03873	0	0.715336	0
Fat3	-3.74573	0	3.36801	0	0.715256	0
Mmp28	-3.17915	0	5.91762	0	0.714893	0
Arpc2	-0.975778	0.503628	1.51088	0	0.713753	0
Fam92a	-1.57384	0.881348	2.92734	0	0.713489	0
Gnpat	-1.13316	0.566581	2.07746	0	0.712528	0
Ppp2r3a	-0.409197	0.220337	0.818395	0	0.712266	0
Timp2	-0.944302	0.503628	2.20337	0	0.711682	0
Ttc39b	-4.43822	0.283291	6.01205	0	0.711597	0
Gm3893	-2.89586	0.346244	5.88615	0	0.710486	0
Dcun1d1	-1.41645	0.786918	3.27358	0	0.709792	0
Decr2	-0.503628	0.283291	0.912825	0	0.70971	0
Dync1li1	-2.54961	0.566581	4.75299	0	0.709109	0
Sall3	-2.04599	0.692488	4.24936	0	0.709067	0
Astn1	-1.00726	0.598058	1.7627	0	0.709061	0
Srp19	-1.19612	0.503628	1.95156	0	0.709036	0
Gm9079	-0.251814	0.0944302	0.818395	0	0.708443	0
Sap18	-0.409197	0.220337	0.786918	0	0.707937	0
Ttc32	-2.42371	0.661011	6.32682	0	0.707687	0
Ctcf	-0.125907	0	6.16944	0	0.707003	0
Pigp	-0.535104	0.314767	1.07021	0	0.706189	0
Elovl4	-1.29055	0.723965	2.51814	0	0.705772	0
Fam162a	-0.566581	0.314767	1.03873	0	0.705543	0
Nudt15	-3.90311	0	5.44547	0	0.704976	0
Elof1	-0.944302	0.472151	2.07746	0	0.704789	0
Stx8	-1.54236	0.692488	2.73848	0	0.704394	0
Colq	-3.77721	0.629534	5.76024	0	0.704367	0
Rsl24d1	-1.63679	0.661011	2.10894	0	0.704127	0
Ctsf	-0.377721	0.220337	0.818395	0	0.703682	0
Cflar	-0.377721	0.220337	0.755441	0	0.702809	0
Map7d1	-1.19612	0.661011	2.20337	0	0.702307	0
1810022K09Rik	-0.723965	0.346244	1.03873	0	0.702287	0
Bmp4	-0.283291	0.125907	0.723965	0	0.701934	0
Fbxo7	-1.38498	0.723965	2.42371	0	0.701665	0
Klc4	-4.72151	0	6.29534	0	0.701578	0
Ppp1cb	-1.03873	0.566581	1.47941	0	0.70102	0
Cyp4f40	-0.251814	0.0944302	0.598058	0	0.700779	0
Rapgef2	-4.62708	0.125907	1.69974	0	0.700645	0
2610001J05Rik	-0.692488	0.409197	1.22759	0	0.70022	0
Aldoart2	-0.283291	0.125907	0.723965	0	0.699992	0
Zc3h11a	-1.13316	0.661011	2.07746	0	0.69979	0
Pithd1	-1.07021	0.566581	2.36075	0	0.699743	0
Psmb3	-0.629534	0.346244	1.10169	0	0.699369	0
Actb	-0.251814	0.157384	0.535104	0	0.699257	0
S100pbp	-4.69003	0.0314767	5.06775	0	0.698901	0
Ube2d3	-0.629534	0.346244	1.13316	0	0.698851	0
Dolpp1	-1.51088	0.786918	3.08472	0	0.698738	0
Erap1	-4.75299	0.0629534	6.3583	0	0.69857	0
Stx12	-1.19612	0.629534	2.707	0	0.697926	0
Gstz1	-0.881348	0.503628	1.47941	0	0.697889	0
Acsl3	-0.314767	0.18886	0.629534	0	0.697394	0
Ptgds	-1.38498	0.503628	6.45273	0	0.697255	0
1600029O15Rik	-1.3535	0.912825	2.707	0	0.696853	0
Rsc1a1	-0.629534	0	5.16218	0	0.696766	0
Zcchc18	-0.598058	0.314767	1.07021	0	0.696755	0
Rps25	-0.535104	0.314767	0.975778	0	0.69536	0
Hrsp12	-0.472151	0.251814	0.881348	0	0.694126	0
Fgf9	-0.692488	0.18886	1.69974	0	0.693209	0
Gpc6	-0.944302	0.503628	1.57384	0	0.692957	0
Gm5801	-2.07746	0.912825	6.83045	0	0.692806	0
Wnk3	-0.18886	0	5.66581	0	0.692614	0
1500011B03Rik	-0.944302	0.472151	1.73122	0	0.692247	0
Ncstn	-0.786918	0.409197	1.22759	0	0.692036	0
E2f2	-0.283291	0.125907	0.786918	0	0.690482	0
Prss56	-2.42371	0.881348	3.2421	0	0.689911	0
Zdhhc7	-4.53265	-0.0629534	6.01205	0	0.689822	0
Cdh10	-0.818395	0.409197	1.54236	0	0.689821	0
Slbp	-1.3535	0.692488	2.61257	0	0.689772	0
Trim35	-1.10169	0.535104	1.95156	0	0.68964	0
Slc7a8	-4.15493	0.0944302	0.535104	0	0.689251	0
Uri1	-5.06775	0.0629534	6.45273	0	0.68903	0
Rsad2	-0.283291	0.125907	0.723965	0	0.688895	0
Phb	-0.503628	0.283291	0.944302	0	0.688823	0
Zfp426	-2.04599	0	6.26387	0	0.68812	0
Coro1c	-4.5956	0.0629534	5.63433	0	0.686408	0
Nme7	-0.535104	0.283291	1.13316	0	0.686286	0
4930425O10Rik	-0.283291	0.157384	0.818395	0	0.686048	0
Zfp292	-2.707	0.849872	5.03628	0	0.686011	0
Zfp438	-4.97332	0.0944302	6.32682	0	0.685478	0
BC031181	-0.409197	0.220337	0.786918	0	0.685435	0
Pxmp2	-0.944302	0.409197	1.85713	0	0.685124	0
Ptk7	-4.0605	0.157384	0.881348	0	0.685055	0
Bco2	-1.32202	0.661011	2.61257	0	0.684881	0
Celf5	-0.440674	0.18886	0.881348	0	0.684811	0
Ccdc126	-4.31231	1.25907	5.60286	0	0.683939	0
Etohd2	-4.21788	0.125907	5.88615	0	0.681894	0
Plekha7	-4.28083	0.0629534	4.81594	0	0.681629	0
Aldh1a1	-1.38498	0.723965	2.61257	0	0.680996	0
Snhg9	-0.566581	0.251814	0.818395	0	0.680935	0
Zfp626	-4.15493	0.377721	4.94185	0	0.680709	0
Bcl2	-1.19612	0.346244	1.25907	0	0.680409	0
Ik	-1.07021	0.503628	2.48666	0	0.679766	0
B4gat1	-0.629534	0.314767	1.13316	0	0.679586	0
Slc39a12	-0.440674	0.220337	0.786918	0	0.679394	0
Dnajc17	-4.78446	0.0314767	6.20091	0	0.679135	0
Idh2	-0.503628	0.283291	0.944302	0	0.678523	0
Clcn3	-0.723965	0.346244	1.19612	0	0.678259	0
1700034P13Rik	-1.85713	0.125907	1.10169	0	0.678137	0
Timm17a	-0.661011	0.346244	1.16464	0	0.676989	0
Pomp	-0.661011	0.346244	1.07021	0	0.676959	0
E2f8	-0.283291	0.125907	0.786918	0	0.676923	0
Pabpc4l	-0.314767	0.125907	4.81594	0	0.676728	0
Ilk	-1.10169	0.440674	1.29055	0	0.67471	0
Proser3	-0.314767	0.0629534	0.818395	0	0.6743	0
Ptp4a2	-1.03873	0.409197	2.42371	0	0.673738	0
Rpusd2	-2.26632	0.18886	2.42371	0	0.673497	0
Lpin2	-3.6513	0.0944302	5.79172	0	0.673238	0
Ate1	-1.47941	0.598058	2.23485	0	0.672415	0
Lrp3	-3.99754	0.440674	4.69003	0	0.67202	0
Mfhas1	-4.50117	0	6.23239	0	0.671346	0
Shc1	-5.16218	-0.220337	6.23239	0	0.671229	0
Ankrd16	-2.2978	0.409197	6.32682	0	0.671126	0
Tmem106b	-0.849872	0.409197	1.41645	0	0.670728	0
Pias2	-2.20337	1.03873	3.2421	0	0.670566	0
Spcs1	-0.503628	0.251814	0.849872	0	0.670206	0
Tbrg4	-4.69003	0.0314767	0.692488	0	0.670085	0
Cdan1	-3.17915	2.89586	5.79172	0	0.669962	0
Crebrf	-4.43822	0.18886	4.97332	0	0.668901	0
Itch	-1.66827	0.786918	2.707	0	0.668894	0
Dusp11	-1.03873	0.503628	1.57384	0	0.668476	0
Dnajb14	-3.93459	0	5.28809	0	0.667312	0
2900097C17Rik	-1.32202	0.566581	2.20337	0	0.666999	0
Aftph	-4.5956	0	6.42125	0	0.666286	0
Shisa5	-0.723965	0.346244	1.19612	0	0.665965	0
A2m	-0.125907	0	5.57138	0	0.665739	0
Gtf2ird1	-4.37526	-0.0314767	6.04353	0	0.664762	0
Mthfd2l	-3.36801	1.07021	4.78446	0	0.664716	0
Elovl1	-1.41645	1.00726	2.707	0	0.664269	0
Hist3h2a	-0.535104	0.251814	0.881348	0	0.664158	0
Eea1	-1.44793	0.566581	2.89586	0	0.664137	0
Alpk3	-2.76995	0.346244	5.38252	0	0.664031	0
Pomgnt1	-4.53265	0	5.5399	0	0.663939	0
Pyurf	-0.661011	0.314767	1.07021	0	0.662536	0
Timm50	-0.944302	0.440674	1.38498	0	0.662512	0
Snx19	-1.95156	0.881348	4.81594	0	0.662466	0
Mbnl3	-0.692488	0.377721	1.44793	0	0.661749	0
Stx4a	-1.60531	0.849872	2.73848	0	0.660912	0
2810029C07Rik	-0.251814	0.0314767	3.49392	0	0.66081	0
Mir3473f	-0.912825	0.440674	2.2978	0	0.660669	0
Thsd4	-0.346244	0.157384	0.786918	0	0.660121	0
Pot1a	-0.503628	0.0314767	5.98058	0	0.659458	0
Il1rn	-0.409197	0.125907	1.32202	0	0.659299	0
1810043G02Rik	-1.73122	0.629534	6.79897	0	0.65927	0
Slc35e2	-3.27358	0.283291	0.912825	0	0.659131	0
Ints10	-1.25907	0.598058	2.61257	0	0.658432	0
Klra2	-0.377721	0.157384	1.07021	0	0.658365	0
Tmem231	-4.50117	0.0944302	5.35104	0	0.65776	0
Trappc4	-0.723965	0.346244	1.25907	0	0.657588	0
Pcbp2	-1.13316	0.440674	1.51088	0	0.657549	0
Hdac2	-1.66827	0.786918	2.95881	0	0.656991	0
Ovca2	-3.96607	0.912825	2.86438	0	0.655268	0
Rhbdf1	-1.29055	0.629534	2.32928	0	0.654796	0
Hipk3	-3.1162	0.0314767	5.47695	0	0.654742	0
9330159F19Rik	-0.723965	0.314767	1.10169	0	0.654662	0
H1f0	-0.723965	0.314767	1.60531	0	0.654527	0
Fbxo32	-3.84016	0.157384	3.55687	0	0.653564	0
Dhrs7	-0.472151	0.251814	0.849872	0	0.651363	0
Ice1	-4.53265	0.0314767	6.20091	0	0.651318	0
Ube2i	-0.849872	0.440674	1.63679	0	0.650886	0
Fam76a	-1.54236	0.786918	2.64404	0	0.650883	0
Ddx18	-1.47941	0.566581	2.92734	0	0.650744	0
Gm16702	-0.346244	0.18886	0.692488	0	0.650043	0
9030617O03Rik	-0.566581	-0.0314767	6.10648	0	0.649224	0
Cst6	-0.314767	0.125907	1.13316	0	0.649097	0
Trib1	-3.77721	0	6.20091	0	0.648711	0
Arcn1	-1.07021	0.472151	1.98303	0	0.648066	0
Srrt	-4.75299	0	6.23239	0	0.647926	0
Mir99ahg	-1.7627	0.440674	1.19612	0	0.646124	0
Eif4e3	-0.503628	0.125907	3.36801	0	0.645869	0
Pno1	-1.54236	0.786918	2.83291	0	0.644579	0
Mar-02b	-0.440674	0.220337	0.786918	0	0.644556	0
Snx17	-0.912825	0.409197	2.01451	0	0.644298	0
Cry1	-1.54236	0.818395	2.89586	0	0.644224	0
Naa20	-0.881348	0.409197	1.57384	0	0.644193	0
Tuba1c	-0.818395	0.377721	1.66827	0	0.643453	0
Rhob	-0.755441	0.346244	1.32202	0	0.642921	0
Mrpl43	-2.54961	0.377721	1.38498	0	0.642665	0
Zc3hav1l	-3.90311	0.440674	1.7627	0	0.6422	0
Haus5	-0.283291	0	5.85467	0	0.642154	0
Smox	-0.566581	0.283291	1.13316	0	0.642093	0
Cts8	-0.535104	0.18886	1.92008	0	0.640848	0
Abcc1	-4.65856	0.0314767	4.81594	0	0.640532	0
Emc3	-0.440674	0.220337	0.818395	0	0.640528	0
Vmn1r65	-1.19612	0.440674	3.55687	0	0.640375	0
Akt1	-2.20337	0	6.3583	0	0.639164	0
Vps13c	-4.02902	0	6.01205	0	0.638562	0
Lilra6	-0.251814	0.0944302	0.535104	0	0.638466	0
Dnajb11	-1.22759	0.598058	1.66827	0	0.637967	0
Gm14296	-3.87164	0.440674	4.78446	0	0.637897	0
Tle2	-4.65856	0.125907	2.39223	0	0.637783	0
Tm2d1	-0.629534	0.314767	1.13316	0	0.637745	0
Nanog	-4.02902	0.566581	3.99754	0	0.637536	0
Fam114a1	-0.314767	0.0629534	1.00726	0	0.636706	0
Cinp	-4.75299	1.3535	6.07501	0	0.636176	0
Dtx1	-1.47941	0.755441	2.58109	0	0.635985	0
Pigg	-4.81594	0.0314767	6.23239	0	0.635366	0
Ppp3ca	-0.692488	0.346244	1.29055	0	0.634946	0
Echs1	-0.566581	0.251814	0.912825	0	0.634837	0
Rbms2	-3.17915	1.29055	2.17189	0	0.633848	0
Actr2	-0.503628	0.251814	0.912825	0	0.633581	0
Tmbim4	-0.409197	0.18886	0.786918	0	0.633581	0
Vps16	-1.51088	0.786918	3.02177	0	0.633403	0
Itgav	-0.566581	0.283291	1.03873	0	0.632923	0
Bckdha	-0.755441	0.346244	1.41645	0	0.632807	0
Trmt2a	-1.38498	0.723965	2.83291	0	0.63277	0
Gnb2	-0.440674	0.220337	0.786918	0	0.631724	0
Pgam5	-4.5956	0	6.48421	0	0.630883	0
Ttc28	-0.346244	0.0944302	3.87164	0	0.630672	0
Cyp2j6	-0.566581	0.283291	0.944302	0	0.630395	0
Park2	-3.6513	0.283291	6.10648	0	0.629803	0
Srrm1	-0.975778	0.409197	1.19612	0	0.62966	0
Efna2	-1.60531	0.661011	2.76995	0	0.628689	0
Gas2l3	-0.692488	0.314767	1.47941	0	0.628641	0
Minpp1	-5.25661	0.0944302	6.57864	0	0.626991	0
Gm6182	-3.87164	0.440674	4.78446	0	0.626197	0
Chmp1b	-1.25907	0.472151	2.42371	0	0.625737	0
G630064G18Rik	-0.912825	0.535104	2.2978	0	0.625709	0
Gm14305	-2.01451	0.377721	1.16464	0	0.625224	0
Rrp1	-1.13316	0.503628	2.10894	0	0.625121	0
Bcl2l12	-4.56413	0.157384	6.01205	0	0.625116	0
Epas1	-0.723965	0.314767	1.3535	0	0.625099	0
Smad2	-2.80143	-0.0314767	6.29534	0	0.625022	0
Ilf3	-1.19612	0.566581	2.42371	0	0.624634	0
Arfip1	-1.85713	0.723965	6.67307	0	0.624576	0
Nt5m	-1.3535	0.440674	2.54961	0	0.624523	0
Uevld	-0.346244	0.0944302	0.818395	0	0.624087	0
Sptssa	-1.38498	0.535104	2.14042	0	0.623839	0
Larp4	-3.05324	0.881348	5.66581	0	0.623396	0
Rtn3	-0.346244	0.157384	0.629534	0	0.623366	0
Snrnp40	-1.54236	0.629534	2.80143	0	0.622916	0
Rpl24	-0.472151	0.220337	0.849872	0	0.622339	0
Adarb2	-1.16464	0.503628	2.17189	0	0.622213	0
Litaf	-4.09197	0.0314767	5.44547	0	0.622112	0
Tns2	-4.28083	0.0314767	5.31957	0	0.621772	0
Elk4	-0.251814	0.0944302	0.566581	0	0.620255	0
Map4k5	-1.98303	0.975778	2.99029	0	0.620189	0
Slc1a3	-0.283291	0.18886	0.377721	0	0.619976	0
Ccdc132	-1.57384	0.598058	3.58835	0	0.619238	0
Suox	-1.54236	0.566581	2.20337	0	0.618778	0
Zcchc4	-2.76995	-0.0944302	5.38252	0	0.618637	0
Alas1	-1.25907	0.723965	2.61257	0	0.618509	0
Fxr1	-1.54236	0.535104	3.08472	0	0.618421	0
Themis	-0.944302	0.377721	2.36075	0	0.618412	0
Mapk4	-0.692488	0.314767	1.19612	0	0.618121	0
Gm12018	-0.912825	0.377721	2.61257	0	0.618046	0
1700017B05Rik	-4.84742	0.0314767	4.43822	0	0.617996	0
Tet1	-3.36801	2.99029	5.13071	0	0.617899	0
Map2k1	-1.07021	0.503628	1.69974	0	0.6178	0
Hint1	-0.503628	0.220337	0.881348	0	0.617055	0
Crot	-0.503628	0.220337	0.849872	0	0.616638	0
Rrbp1	-1.38498	0.723965	2.51814	0	0.616477	0
Rnf38	-5.06775	1.54236	6.04353	0	0.616185	0
Smim10l1	-0.818395	0.377721	1.44793	0	0.616088	0
Ring1	-2.01451	1.51088	3.36801	0	0.615878	0
Trappc9	-0.661011	0.283291	0.944302	0	0.615821	0
Rnf180	-1.47941	0.440674	2.14042	0	0.615307	0
Arsk	-1.41645	0.786918	2.39223	0	0.615029	0
Smndc1	-1.8886	0.755441	2.95881	0	0.612374	0
Ankrd17	-1.63679	0.661011	3.77721	0	0.612055	0
Myl12a	-1.13316	0.472151	2.10894	0	0.612047	0
Myo9a	-3.58835	0	5.60286	0	0.611967	0
Mybbp1a	-3.93459	0.0629534	0.723965	0	0.611963	0
Fgf13	-1.73122	0.629534	3.61982	0	0.611717	0
Atp1b1	-0.377721	0.18886	0.692488	0	0.611526	0
Drap1	-1.29055	0.440674	1.51088	0	0.610003	0
Mrpl52	-1.82565	0.409197	1.95156	0	0.609995	0
Dpm1-adnp	-3.08472	0	5.50843	0	0.609639	0
Atp13a2	-1.95156	1.00726	2.58109	0	0.609266	0
Naca	-0.598058	0.283291	1.03873	0	0.609177	0
Luc7l	-1.29055	0.535104	2.64404	0	0.608894	0
Maoa	-1.03873	0.472151	1.51088	0	0.608626	0
Golga1	-1.8886	0.786918	3.21063	0	0.608453	0
Tcta	-1.00726	0.409197	1.25907	0	0.607593	0
Polr2e	-1.10169	0.440674	1.44793	0	0.607237	0
Cdh20	-1.44793	0.535104	2.76995	0	0.606398	0
Heatr6	-2.54961	0.535104	5.31957	0	0.604069	0
4930528D03Rik	-0.314767	-0.0314767	2.01451	0	0.603932	0
Efcab14	-0.881348	0.377721	1.32202	0	0.603797	0
Pms2	-0.377721	0.125907	1.44793	0	0.602903	0
Rasd2	-0.314767	0.125907	0.692488	0	0.602569	0
Heph	-4.94185	0.157384	6.23239	0	0.602279	0
Cpt2	-1.3535	0.692488	2.32928	0	0.602125	0
Calm2	-0.535104	0.251814	0.881348	0	0.601949	0
Zfp260	-1.60531	0.786918	2.64404	0	0.601939	0
Fam206a	-1.22759	0.409197	4.94185	0	0.601746	0
Bach2	-3.71425	0.472151	4.84742	0	0.600648	0
Smim11	-0.881348	0.377721	1.19612	0	0.600603	0
Acadl	-0.535104	0.251814	0.975778	0	0.60018	0
Cenpf	-3.99754	0.409197	4.87889	0	0.599438	0
Hspb8	-5.16218	0	6.70454	0	0.598923	0
Nphs1	-3.61982	3.43096	5.06775	0	0.598307	0
Dcakd	-1.51088	0.535104	2.51814	0	0.598253	0
Ube3a	-1.63679	0.598058	3.05324	0	0.597992	0
Ccdc62	-2.51814	0	5.38252	0	0.597408	0
Tap2	-1.60531	0.692488	2.86438	0	0.597309	0
Clybl	-0.786918	0.314767	1.13316	0	0.597292	0
Snn	-2.36075	0.786918	5.414	0	0.597073	0
Pnpla6	-5.0048	0	6.3583	0	0.596994	0
Irak4	-3.77721	0.157384	0.755441	0	0.596705	0
Smim8	-1.07021	0.346244	2.10894	0	0.596482	0
Gm14436	-0.566581	0	3.90311	0	0.596408	0
H2afv	-0.503628	0.220337	0.849872	0	0.59596	0
Cdc25c	-0.440674	0.157384	0.755441	0	0.595937	0
Gnl3l	-0.755441	0.314767	1.22759	0	0.595755	0
Lpar4	-4.62708	0.912825	5.22514	0	0.595465	0
Klhl36	-3.17915	0.0314767	5.16218	0	0.594249	0
Pelo	-0.346244	0	3.30506	0	0.593723	0
Smarcad1	-4.5956	0	6.57864	0	0.59347	0
Set	-0.723965	0.314767	1.22759	0	0.593363	0
Snord49b	-0.440674	0	2.58109	0	0.593207	0
Susd6	-1.41645	0.629534	2.61257	0	0.592966	0
Slc30a8	-0.314767	0.0944302	0.723965	0	0.592492	0
2310067B10Rik	-1.8886	0.849872	2.51814	0	0.591942	0
Ctc1	-4.65856	0	5.98058	0	0.591581	0
Agpat5	-0.440674	0.18886	0.786918	0	0.591254	0
Isy1	-3.49392	0	5.76024	0	0.591197	0
Btf3	-0.598058	0.251814	0.944302	0	0.59106	0
Zbtb17	-4.15493	0	5.22514	0	0.591038	0
Asap1	-1.8886	0.786918	2.99029	0	0.590963	0
Ubl7	-1.10169	0.409197	1.95156	0	0.590947	0
Tet2	-3.52539	0.409197	1.41645	0	0.59087	0
Arl8b	-0.598058	0.251814	1.00726	0	0.590671	0
3110056K07Rik	-1.54236	0.535104	3.36801	0	0.59052	0
Gucy1a2	-0.409197	0.125907	1.3535	0	0.589819	0
Snhg5	-3.90311	1.3535	3.14767	0	0.589476	0
Bbc3	-0.346244	0.0629534	0.755441	0	0.588827	0
Sec24a	-2.2978	0.755441	3.43096	0	0.587841	0
Smg1	-1.69974	0.535104	2.89586	0	0.587627	0
Gca	-1.10169	0.472151	1.73122	0	0.587322	0
Csf1r	-0.283291	0.0944302	0.629534	0	0.586369	0
Myh9	-1.54236	0.944302	2.10894	0	0.586305	0
Mmd2	-0.314767	0.125907	0.535104	0	0.586195	0
Ttc14	-0.786918	0.314767	1.10169	0	0.585678	0
5430421F17Rik	-0.283291	0.0944302	0.692488	0	0.584989	0
Kbtbd3	-3.74573	0.18886	6.07501	0	0.584845	0
Usp25	-4.0605	0.18886	4.50117	0	0.584686	0
Unc5b	-0.283291	0.0629534	0.535104	0	0.584189	0
Mettl2	-2.48666	0.818395	4.87889	0	0.583897	0
Slitrk5	-0.629534	0	5.66581	0	0.583896	0
Timm23	-0.566581	0.251814	0.975778	0	0.582353	0
Gm6793	-4.37526	0.314767	6.16944	0	0.581871	0
Akap8	-1.44793	0.346244	1.73122	0	0.581389	0
Scara3	-0.503628	0.220337	0.881348	0	0.581257	0
Etohi1	-0.566581	0.220337	0.818395	0	0.581069	0
Pfdn5	-0.755441	0.314767	1.13316	0	0.580558	0
Ahsa1	-1.13316	0.440674	1.82565	0	0.578327	0
Dand5	-4.43822	0	6.20091	0	0.578086	0
Got1	-1.54236	0.692488	2.86438	0	0.578024	0
Lbh	-4.21788	0.535104	4.43822	0	0.577974	0
Cd33	-0.377721	0.125907	1.79417	0	0.577715	0
Phactr1	-1.19612	0.409197	2.42371	0	0.577214	0
Dnajb5	-3.36801	0	6.07501	0	0.576726	0
Ahcyl1	-0.692488	0.283291	1.10169	0	0.575899	0
Gba2	-0.409197	0.0629534	5.63433	0	0.575264	0
Lpar6	-1.66827	0.755441	2.83291	0	0.574981	0
Ufc1	-1.19612	0.472151	2.01451	0	0.57468	0
1500012K07Rik	-0.346244	0.0314767	2.99029	0	0.574311	0
Gm14327	-3.36801	0.251814	5.57138	0	0.573706	0
Aifm1	-1.51088	0.503628	2.80143	0	0.573191	0
Tor1a	-0.944302	0.346244	1.32202	0	0.57293	0
Glipr2	-5.03628	-0.0314767	6.38978	0	0.572919	0
Cmah	-3.99754	0.346244	3.17915	0	0.572493	0
Pygm	-5.44547	0.723965	2.36075	0	0.572483	0
9130024F11Rik	-0.314767	0.0944302	0.629534	0	0.572362	0
Mif4gd	-1.19612	0.472151	1.66827	0	0.572094	0
Extl3	-1.47941	0.661011	2.54961	0	0.571454	0
Mtpn	-0.786918	0.346244	1.19612	0	0.571317	0
Tspan4	-1.54236	0.598058	2.61257	0	0.569638	0
Ftsj1	-2.32928	0.314767	1.29055	0	0.569157	0
Zc3h18	-4.56413	0.0314767	5.03628	0	0.568364	0
Actr6	-1.73122	0.786918	2.92734	0	0.567449	0
Znhit3	-1.79417	0.912825	2.80143	0	0.566998	0
Scrn1	-1.25907	0.535104	1.7627	0	0.56687	0
Fkbp1a	-0.566581	0.251814	0.912825	0	0.566616	0
Rpl36a	-0.944302	0.314767	1.22759	0	0.564564	0
Hps3	-0.220337	0	6.07501	0	0.564343	0
Plekhf2	-1.47941	0.377721	6.42125	0	0.564233	0
Cops6	-0.566581	0.220337	0.849872	0	0.564184	0
Zfp719	-4.09197	0.0314767	0.912825	0	0.564022	0
Trim43b	-1.19612	0.377721	4.43822	0	0.56307	0
Bnc2	-0.314767	0.0944302	0.692488	0	0.56295	0
Dlk1	-4.43822	0	2.20337	0	0.562404	0
2310015A10Rik	-3.80868	0	4.50117	0	0.561841	0
Tbl1xr1	-5.03628	1.16464	5.06775	0	0.561121	0
Hiatl1	-1.22759	0.472151	1.44793	0	0.560918	0
Pitpnc1	-0.535104	0.220337	0.912825	0	0.560874	0
Rpl32	-0.535104	0.220337	0.849872	0	0.560679	0
Tdrd3	-3.77721	0	6.01205	0	0.560595	0
Yif1a	-0.629534	0.251814	1.07021	0	0.560553	0
Ermp1	-1.57384	0.535104	2.76995	0	0.560451	0
Thrb	-2.54961	0.975778	2.92734	0	0.56038	0
Tapbpl	-3.84016	0.377721	1.07021	0	0.560207	0
Sod2	-0.503628	0.220337	0.849872	0	0.559665	0
Fbxo3	-1.44793	0.723965	2.17189	0	0.55963	0
Hapln1	-0.661011	0.251814	1.00726	0	0.559403	0
Pcnx	-5.09923	0.0314767	6.3583	0	0.558607	0
Kctd5	-1.10169	0.377721	1.25907	0	0.558537	0
Fgfr2	-0.692488	0.251814	1.16464	0	0.55752	0
Suv420h2	-5.09923	1.10169	3.46244	0	0.557283	0
Amd2	-0.723965	0.283291	1.00726	0	0.557053	0
Sp3os	-1.92008	0.661011	2.54961	0	0.556117	0
Spon1	-0.975778	0.346244	1.29055	0	0.555958	0
Cd81	-0.251814	0.125907	0.440674	0	0.555918	0
Pdpk1	-4.78446	0	5.76024	0	0.554966	0
Pcsk2	-0.283291	0.0944302	0.535104	0	0.554846	0
Ctdsp1	-1.44793	0.440674	2.36075	0	0.554164	0
Gdi2	-0.755441	0.283291	1.07021	0	0.553409	0
Rgs17	-0.535104	0.0944302	0.692488	0	0.553032	0
Rbms1	-2.14042	0.975778	2.83291	0	0.552811	0
Pctp	-4.15493	0.0314767	6.01205	0	0.552687	0
Cav2	-1.63679	0.661011	2.92734	0	0.552179	0
Abca2	-1.85713	0.566581	6.42125	0	0.550742	0
Dgkd	-4.91037	0	5.98058	0	0.55011	0
9430083A17Rik	-0.440674	0.125907	1.16464	0	0.550026	0
Rps6kb2	-5.03628	-0.125907	6.20091	0	0.54945	0
P4ha1	-0.535104	0.220337	1.00726	0	0.549249	0
Spire1	-1.38498	0.472151	1.66827	0	0.549136	0
Acot2	-0.503628	0.220337	0.912825	0	0.548819	0
Med12l	-4.53265	0	5.66581	0	0.54863	0
Rpl7a	-0.661011	0.251814	0.975778	0	0.548465	0
Tcf4	-0.472151	0.18886	0.849872	0	0.548377	0
Fbxo36	-5.06775	1.00726	2.707	0	0.548306	0
Gemin2	-0.220337	0	6.42125	0	0.548254	0
Pfdn1	-0.786918	0.314767	1.22759	0	0.547486	0
D830030K20Rik	-1.16464	0.535104	2.26632	0	0.54719	0
Golph3	-0.849872	0.346244	1.19612	0	0.546869	0
Mrpl9	-0.786918	0.283291	1.13316	0	0.546717	0
Ptp4a3	-1.3535	0.314767	1.22759	0	0.546607	0
Atp6v1e1	-0.535104	0.220337	0.881348	0	0.546415	0
Bc1	-0.881348	0.18886	1.63679	0	0.545451	0
Ebpl	-1.00726	0.346244	1.25907	0	0.545111	0
Bola3	-0.881348	0.346244	1.22759	0	0.544036	0
Rnf225	-1.10169	0.346244	3.61982	0	0.543087	0
Uck1	-1.66827	0.692488	2.73848	0	0.542134	0
Isca2	-0.786918	0.283291	1.00726	0	0.541275	0
Sh3bgrl3	-1.51088	0.409197	2.42371	0	0.541246	0
Adamts13	-4.12345	0.440674	1.03873	0	0.540867	0
Safb	-2.26632	0.535104	3.93459	0	0.538783	0
Mrpl17	-0.786918	0.283291	1.25907	0	0.538588	0
Auts2	-5.38252	0.503628	5.57138	0	0.538521	0
Cnep1r1	-1.69974	0.598058	2.92734	0	0.538179	0
Pilra	-1.03873	0.409197	1.85713	0	0.538178	0
Rbm7	-1.07021	0.409197	1.32202	0	0.537555	0
Pfkfb2	-3.08472	0.629534	5.03628	0	0.536554	0
Pex16	-1.47941	0.566581	2.707	0	0.536319	0
Nsun4	-1.63679	0.409197	2.80143	0	0.536303	0
Lgi4	-0.881348	0.314767	1.32202	0	0.536254	0
Ipmk	-4.50117	0	5.57138	0	0.535984	0
Hmg20a	-1.54236	0.598058	2.51814	0	0.53538	0
Seh1l	-2.58109	0.755441	3.93459	0	0.535263	0
Cd276	-0.723965	0	1.00726	0	0.534195	0
Lrrc39	-0.944302	0.314767	1.95156	0	0.533643	0
Parp3	-4.72151	0	6.01205	0	0.532995	0
Stxbp4	-1.60531	0.346244	1.25907	0	0.532471	0
Ifitm3	-5.35104	0.314767	6.26387	0	0.53242	0
Adam17	-4.65856	0.18886	6.23239	0	0.532358	0
Syf2	-0.692488	0.251814	0.944302	0	0.532229	0
Pcm1	-2.45518	0.755441	3.74573	0	0.531539	0
Hspe1	-0.440674	0.18886	0.723965	0	0.531034	0
Plek	-0.440674	0.0944302	4.84742	0	0.530983	0
4930592A05Rik	-0.346244	0.0944302	0.818395	0	0.530728	0
Zkscan17	-4.78446	0.283291	6.01205	0	0.530108	0
Haus2	-3.77721	0.346244	4.15493	0	0.53006	0
Mrpl28	-0.944302	0.346244	1.3535	0	0.528636	0
St13	-0.912825	0.346244	1.25907	0	0.528526	0
Smpdl3a	-0.409197	0.157384	0.692488	0	0.528456	0
Ly86	-0.314767	0.0944302	0.692488	0	0.527896	0
Ccnj	-0.629534	0.0944302	0.881348	0	0.527724	0
3830408C21Rik	-3.55687	0.0629534	0.503628	0	0.527623	0
Uba3	-1.00726	0.314767	1.66827	0	0.527227	0
Arxes2	-0.472151	0.18886	0.786918	0	0.526758	0
Ldlrad3	-1.57384	0.535104	2.73848	0	0.525878	0
Tank	-0.692488	0.251814	1.00726	0	0.525452	0
Lincenc1	-0.377721	0.125907	0.849872	0	0.524955	0
A430085M09Rik	-0.975778	-0.157384	3.39949	0	0.524499	0
Mettl3	-1.44793	0.409197	3.43096	0	0.523518	0
Aldh1l1	-0.503628	0.18886	0.818395	0	0.523047	0
Cdc42ep4	-0.755441	0.283291	1.07021	0	0.522429	0
Pradc1	-1.8886	0.598058	2.99029	0	0.522364	0
Pet100	-2.39223	0.283291	1.41645	0	0.520985	0
Prr5	-1.69974	0.629534	2.14042	0	0.519897	0
Ctif	-0.440674	0.0629534	5.44547	0	0.519767	0
Acin1	-2.58109	0.503628	2.73848	0	0.519725	0
Dnaja1	-0.786918	0.283291	1.16464	0	0.519698	0
Selm	-0.818395	0.314767	1.00726	0	0.519083	0
Impg1	-0.409197	0.125907	0.755441	0	0.518986	0
Xpo6	-1.79417	0	5.85467	0	0.518159	0
Tmem251	-1.7627	0.661011	2.86438	0	0.518003	0
Pus7	-3.90311	0.0629534	5.63433	0	0.517925	0
Gm14295	-0.472151	0.18886	0.723965	0	0.516238	0
Grap2	-0.723965	0.251814	1.32202	0	0.515814	0
4833415N18Rik	-0.598058	0.125907	1.57384	0	0.515698	0
Vcpip1	-5.38252	0.598058	3.96607	0	0.515454	0
Abcb9	-0.881348	0.283291	1.32202	0	0.515319	0
Pfn1	-0.472151	0.18886	0.755441	0	0.515318	0
Nelfcd	-1.73122	0.661011	2.73848	0	0.515043	0
Pou3f3	-0.535104	0.220337	0.818395	0	0.5147	0
Slc39a10	-1.51088	0.472151	2.86438	0	0.514651	0
Prpsap1	-1.16464	0.377721	1.41645	0	0.514603	0
Uqcc1	-1.63679	0.535104	2.64404	0	0.51433	0
Klhdc3	-1.63679	0.409197	2.707	0	0.514317	0
Mak16	-4.75299	0.0314767	4.78446	0	0.513966	0
Taf4a	-0.283291	0	5.13071	0	0.513671	0
Cct3	-1.13316	0.409197	1.32202	0	0.512819	0
Cct7	-0.723965	0.251814	1.16464	0	0.5124	0
Rnf14	-1.22759	0.440674	2.04599	0	0.51184	0
Sh3rf1	-2.67552	0.157384	1.10169	0	0.511748	0
Pdxdc1	-1.03873	0.314767	1.22759	0	0.511686	0
Cox20	-0.818395	0.283291	1.03873	0	0.510035	0
Cul5	-0.975778	0.346244	1.57384	0	0.509602	0
Ubac2	-1.22759	0.440674	1.69974	0	0.509314	0
Dclk2	-4.1864	0	5.72876	0	0.509044	0
Arsb	-1.25907	0.440674	1.85713	0	0.508896	0
4930578M01Rik	-0.251814	0.0629534	0.786918	0	0.50883	0
Arl3	-0.598058	0.220337	0.944302	0	0.508696	0
Trappc3	-1.32202	0.503628	1.66827	0	0.507737	0
Zfp213	-4.62708	0	6.13796	0	0.506544	0
Tmem55b	-1.03873	0.346244	1.51088	0	0.506275	0
Dkk1	-0.535104	0.125907	1.47941	0	0.506163	0
Ndrg4	-1.32202	0.503628	2.26632	0	0.506111	0
Azin1	-0.881348	0.314767	1.7627	0	0.505512	0
Porcn	-1.54236	0.472151	2.23485	0	0.504961	0
Ccdc82	-0.440674	0.157384	0.723965	0	0.504631	0
Kl	-0.377721	0.0629534	1.41645	0	0.504384	0
Eme2	-5.03628	0.18886	6.20091	0	0.504353	0
Skap2	-1.66827	0.566581	2.86438	0	0.504309	0
Btc	-0.409197	0.0944302	5.16218	0	0.503645	0
Cbx4	-4.5956	0.0314767	4.53265	0	0.503442	0
Phf5a	-1.92008	0.692488	2.58109	0	0.503349	0
Ccdc97	-4.69003	-0.0314767	5.82319	0	0.503166	0
Dda1	-1.32202	0.440674	1.57384	0	0.503111	0
1700028D13Rik	-0.409197	0.125907	0.849872	0	0.50262	0
Gpld1	-0.692488	0.251814	1.03873	0	0.502279	0
Kcnj14	-5.09923	0	5.63433	0	0.501863	0
Vimp	-0.566581	0.220337	0.849872	0	0.501728	0
B3galt5	-4.81594	0.0314767	4.91037	0	0.501073	0
Rps27l	-0.598058	0.220337	0.818395	0	0.500911	0
Tmem176b	-0.629534	0.220337	0.975778	0	0.500732	0
Rpl11	-0.786918	0.283291	1.03873	0	0.500553	0
H2-Bl	-0.314767	0.0944302	0.629534	0	0.500355	0
Pip5k1c	-4.75299	0	6.10648	0	0.500079	0
Ctage5	-1.19612	0.346244	2.20337	0	0.499865	0
Sp9	-0.409197	0.125907	0.912825	0	0.499553	0
Ldb1	-2.95881	0.629534	3.74573	0	0.499549	0
Vsig10l	-3.68278	0.0314767	5.69729	0	0.499428	0
Cetn3	-1.03873	0.314767	1.25907	0	0.499374	0
Tubg1	-1.8886	0.755441	2.61257	0	0.498676	0
D330041H03Rik	-4.24936	0.440674	4.65856	0	0.498594	0
Ccdc174	-1.98303	0.723965	3.33653	0	0.498087	0
Pak2	-1.57384	0.472151	2.39223	0	0.498072	0
Lca5	-5.06775	0.912825	4.87889	0	0.497848	0
Tnfrsf19	-0.818395	0.251814	1.00726	0	0.497724	0
Agbl2	-4.65856	0	5.22514	0	0.497404	0
AV051173	-0.786918	0	1.19612	0	0.497178	0
Eif5b	-1.47941	0.440674	2.32928	0	0.496982	0
Runx1	-0.440674	0.125907	0.692488	0	0.496643	0
Ripply3	-3.71425	0.283291	0.944302	0	0.496559	0
Tmem196	-0.503628	0.0944302	0.692488	0	0.496557	0
Hopx	-4.62708	0.0629534	5.47695	0	0.496354	0
0610010F05Rik	-3.74573	0	4.5956	0	0.496296	0
9930111H07Rik	-0.314767	-0.0314767	1.16464	0	0.495901	0
Ddit4	-3.1162	0.598058	4.24936	0	0.495453	0
[truncated: 9,096 more rows]

## Sheet: SomCtx_GroundStateVs2wRbpjKO
	lb (lower bound for expression-fold change)	mle (maximum likelihood estimate for expression-fold change)	ub (upper bound for expression-fold change)	ce (conservative estimate for expression-fold change)	Z (uncorrected Z score of expression difference)	cZ (expression difference Z-score corrected for multiple hypothesis testing using Holm procedure)
Tbata	2.15054	2.90956	3.47882	2.15054	7.16081	6.01774		Higher in ground-state somatosensory cortex
Galntl6	1.54966	2.08729	2.5933	1.54966	7.16081	6.01774
Paip1	1.45478	2.05567	2.56167	1.45478	7.15967	6.01774
Comt	1.4864	2.05567	2.56167	1.4864	7.15808	6.01774
Rapgef4	1.20177	1.80266	2.3403	1.20177	7.06229	5.93433
Lrrc8a	1.20177	1.73941	2.21379	1.20177	6.90859	5.77802
Ppm1h	4.80709	5.56611	6.13537	4.80709	6.77952	5.64962
5031426D15Rik	1.4864	2.18217	2.7198	1.4864	6.76437	5.64962
Slc5a3	4.68059	5.47123	6.07212	4.68059	6.13928	4.9132
Fhl3	1.1069	1.64453	2.18217	1.1069	6.08894	4.86984
B630005N14Rik	1.17015	1.73941	2.3403	1.17015	5.7524	4.46719
Hspb8	4.42759	5.78749	7.81153	4.42759	5.6996	4.4175
4930546K05Rik	4.39596	5.1866	5.75586	4.39596	5.27715	3.93433
Prkg2	4.36433	5.09172	5.66099	4.36433	5.13708	3.81335
Cldn19	1.04365	1.64453	6.38837	1.04365	5.09756	3.77239
Ndufs5	1.61291	5.21823	6.38837	1.61291	5.06647	3.74205
Map1b	4.33271	5.09172	5.66099	4.33271	4.98798	3.65766
Nfia	0.727389	1.26502	1.77103	0.727389	4.8656	3.52385
Gm5766	4.49084	5.21823	5.81911	4.49084	4.74303	3.38524
Prtg	4.68059	5.47123	6.07212	4.68059	4.72071	3.37166
Ubc	0.727389	1.32828	1.92916	0.727389	4.63117	3.26575
Hist1h2af	4.36433	5.09172	5.69261	4.36433	4.54547	3.17835
Ogfrl1	0.79064	1.42315	1.99241	0.79064	4.50481	3.12944
Ptgds	2.56167	6.19862	7.14739	2.56167	4.43862	3.04458
Sod3	1.58128	3.00443	4.45921	1.58128	4.40754	3.01956
E4f1	4.0797	5.85074	7.40039	4.0797	4.04046	2.54654
Prr15	0.600887	1.20177	1.73941	0.600887	4.02276	2.52726
Hoxb1	4.30108	5.02847	5.59773	4.30108	4.01881	2.52726
Lrp4	0.632512	1.26502	1.83429	0.632512	4.00935	2.52255
5830416I19Rik	0.727389	1.4864	2.08729	0.727389	4.00722	2.52255
Col4a3	4.39596	5.15498	5.75586	4.39596	3.99862	2.51588
Gm10745	4.26946	5.02847	5.59773	4.26946	3.91315	2.40567
Exoc8	0.569261	1.17015	1.73941	0.569261	3.8787	2.36526
Plau	0.537635	5.3131	5.91399	0.537635	3.75315	2.20641
Lpar4	0.442759	5.28148	6.42	0.442759	3.69435	2.1253
Slx1b	0.50601	1.13852	1.70778	0.50601	3.61788	2.01998
Atxn1	0.442759	0.948768	5.69261	0.442759	3.60286	2.00687
Gnb1	0.537635	1.20177	1.89754	0.537635	3.5732	1.96424
Sparcl1	0.316256	0.664138	0.948768	0.316256	3.55376	1.94817
Cask	0.537635	1.2334	1.80266	0.537635	3.54169	1.93448
Thg1l	0.474384	0.948768	5.85074	0.474384	3.51263	1.9026
Fam214a	2.5933	7.33714	7.93803	2.5933	3.48754	1.87665
9030612E09Rik	0.442759	1.04365	1.58128	0.442759	3.45083	1.82584
AI593442	0.474384	1.13852	1.70778	0.474384	3.35393	1.68694
Ifitm3	4.64897	7.21064	7.96966	4.64897	3.34242	1.67717
Cplx2	4.01645	4.87034	5.50286	4.01645	3.28383	1.61913
Pik3r2	4.55409	6.673	7.84315	4.55409	3.27064	1.61002
Hsf2	0.379507	0.980394	1.54966	0.379507	3.24995	1.57845
Vamp1	3.57369	5.97724	7.21064	3.57369	3.18224	1.48569
Gart	4.36433	5.75586	7.62177	4.36433	3.17618	1.47933
Gata3	0.885517	5.24985	5.78749	0.885517	3.14364	1.43405
Lrtm1	0.284631	0.759015	5.53448	0.284631	3.12066	1.40988
Wbscr25	0.284631	5.0601	5.62936	0.284631	2.9973	1.31074
Dnm3os	0.664138	5.0601	5.72424	0.664138	2.98379	1.29173
Zfp26	4.04808	5.0601	5.66099	4.04808	2.95219	1.27978
Atg7	0.379507	4.68059	5.78749	0.379507	2.94037	1.26461
Ldhb	0.221379	0.664138	1.1069	0.221379	2.93563	1.25915
Cbx3	0.221379	0.727389	1.20177	0.221379	2.92965	1.25318
Dusp23	0.221379	0.759015	1.26502	0.221379	2.92707	1.25318
B3galt2	3.06768	6.76788	7.59015	3.06768	2.91155	1.24366
Nipal1	0.221379	0.759015	1.26502	0.221379	2.91064	1.24366
Dync2li1	4.17458	5.72424	7.6534	4.17458	2.90595	1.24366
Mc1r	0.221379	0.727389	5.28148	0.221379	2.88701	1.22627
Ddx46	3.44719	5.59773	7.30552	3.44719	2.87664	1.21
Fgf12	0.316256	4.87034	5.56611	0.316256	2.85258	1.19217
Sfrp5	1.45478	7.59015	8.19103	1.45478	2.83683	1.1802
Klf13	0.221379	0.759015	1.26502	0.221379	2.83027	1.17681
Wtap	0.221379	0.79064	1.32828	0.221379	2.8283	1.17681
Kif3a	0.221379	0.79064	1.32828	0.221379	2.80875	1.16617
Mapk6	1.42315	7.36877	8.00128	1.42315	2.80655	1.1658
Mrpl19	0.221379	0.79064	1.32828	0.221379	2.79991	1.1585
Rbm45	0.221379	0.79064	1.29665	0.221379	2.79303	1.15367
Zfp91	0.442759	5.34473	6.86276	0.442759	2.78322	1.1487
4930463O16Rik	0.474384	1.32828	2.3403	0.474384	2.77342	1.1487
Ncoa3	0.189754	0.695764	5.15498	0.189754	2.76604	1.1487
Ntrk2	0.189754	0.695764	1.20177	0.189754	2.76294	1.1487
Rilpl2	3.60532	5.37635	7.17901	3.60532	2.71123	1.09269
Igf2bp2	0.189754	0.759015	1.26502	0.189754	2.70864	1.09033
Cdk20	0.727389	5.53448	7.05251	0.727389	2.70553	1.08719
Frs2	0.50601	5.40798	7.02089	0.50601	2.69534	1.07909
Tfap2a	0.189754	0.759015	1.26502	0.189754	2.69275	1.07693
Map1a	0.221379	4.96522	5.53448	0.221379	2.69047	1.07693
Cisd3	0.189754	0.759015	1.29665	0.189754	2.68947	1.07693
Rbm47	0.442759	5.56611	6.167	0.442759	2.6835	1.07649
Ap4b1	1.1069	7.27389	7.9064	1.1069	2.67103	1.06251
Nudt21	1.51803	5.85074	7.46365	1.51803	2.66997	1.06251
Etnppl	0.316256	1.17015	3.00443	0.316256	2.66161	1.05424
Muc15	0.0632512	0.379507	1.29665	0.0632512	2.65614	1.05247
Inhbb	2.24542	5.43961	6.95764	2.24542	2.6514	1.05219
Snrk	0.189754	0.759015	1.29665	0.189754	2.6486	1.04905
Tmem87a	0.158128	0.727389	1.20177	0.158128	2.64272	1.04304
Arl6ip6	1.86591	5.62936	7.6534	1.86591	2.63394	1.04213
Syne2	0.158128	0.695764	1.20177	0.158128	2.63106	1.04213
Hat1	1.45478	5.88236	7.62177	1.45478	2.62932	1.04213
Mirc35hg	0.537635	5.02847	5.66099	0.537635	2.61352	1.02916
Pdp2	0.189754	0.79064	1.3599	0.189754	2.61247	1.02916
Mbd6	0.537635	5.53448	6.673	0.537635	2.58976	1.01064
Picalm	0.189754	0.79064	5.24985	0.189754	2.58368	1.00579
Tsc22d3	0.221379	0.980394	1.73941	0.221379	2.58362	1.00579
Gm1821	0.126502	0.569261	1.01202	0.126502	2.57251	0.993716
Deptor	0.284631	4.36433	5.34473	0.284631	2.56782	0.989329
Cml1	0.189754	0.853892	1.54966	0.189754	2.55905	0.978378
C330006A16Rik	0.126502	0.664138	1.17015	0.126502	2.5562	0.976768
Farsa	0.917143	6.92601	7.68502	0.917143	2.52436	0.942272
Cxxc1	0.695764	7.05251	7.84315	0.695764	2.4879	0.90793
Sae1	0.664138	7.11576	7.81153	0.664138	2.48626	0.90793
Kcnq1ot1	0.126502	0.695764	1.26502	0.126502	2.4809	0.903934
Prkci	1.01202	5.59773	7.49527	1.01202	2.47794	0.902331
Vps18	0.822266	5.78749	7.84315	0.822266	2.4771	0.902331
Fam210b	1.07527	5.62936	7.24227	1.07527	2.46634	0.893381
Folh1	0.632512	7.40039	8.00128	0.632512	2.45043	0.886328
Wdr82	0.79064	7.11576	7.74828	0.79064	2.44979	0.886328
Bdnf	0.189754	4.9336	5.59773	0.189754	2.42629	0.865113
Aimp1	0.948768	6.79951	7.62177	0.948768	2.42493	0.865113
Pi4kb	0.126502	0.632512	5.3131	0.126502	2.42023	0.865113
Dhx40	1.01202	5.43961	6.83113	1.01202	2.41071	0.852726
Pum2	1.20177	5.72424	7.17901	1.20177	2.39697	0.841692
Fam220a	0.221379	0.442759	5.85074	0.221379	2.38765	0.838048
Xpo6	1.01202	5.56611	7.11576	1.01202	2.36089	0.804566
Gphn	0.474384	2.43517	7.9064	0.474384	2.35797	0.804537
Srp54a	0.79064	6.57813	7.40039	0.79064	2.34825	0.790536
Tstd3	0.948768	4.14296	5.34473	0.948768	2.32238	0.760623
Fip1l1	0.980394	5.85074	7.36877	0.980394	2.31326	0.747177
Samhd1	0.0948768	0.347882	5.78749	0.0948768	2.30577	0.738302
Cpne1	0.474384	7.36877	8.03291	0.474384	2.29491	0.726668
E330033B04Rik	0.0632512	0.600887	1.07527	0.0632512	2.29247	0.726668
Abcg1	0.158128	5.12335	5.62936	0.158128	2.29104	0.725402
Nampt	0.664138	5.47123	7.08414	0.664138	2.29018	0.725189
Mark2	0.442759	6.79951	7.55852	0.442759	2.28843	0.724098
Slfn5	0.0632512	0.632512	1.13852	0.0632512	2.27534	0.709556
Gna11	0.0632512	0.664138	1.20177	0.0632512	2.26971	0.708355
Gatsl3	0.632512	5.78749	7.27389	0.632512	2.26839	0.708355
Zfp937	0.0632512	0.600887	1.07527	0.0632512	2.2647	0.706289
Ift74	0.0948768	5.59773	6.95764	0.0948768	2.26461	0.706289
Gpm6a	0.0632512	0.537635	0.980394	0.0632512	2.2605	0.702353
Rsbn1	0.158128	4.71222	6.2935	0.158128	2.2578	0.698361
Alg11	0.0632512	0.600887	1.1069	0.0632512	2.24729	0.688792
Ppp1r16b	0.0632512	0.600887	1.07527	0.0632512	2.24231	0.685779
Psd3	0.379507	6.26187	7.33714	0.379507	2.23312	0.673294
Zfp932	0.347882	3.8267	5.0601	0.347882	2.22974	0.671675
Nudt8	0.632512	5.28148	6.64138	0.632512	2.21793	0.664468
Cd81	0.0316256	0.50601	0.917143	0.0316256	2.21347	0.658165
Pptc7	0.158128	3.63695	6.23025	0.158128	2.20853	0.653817
Fndc5	0.0632512	0.600887	1.1069	0.0632512	2.2053	0.651396
Zfp512	0.221379	5.78749	7.30552	0.221379	2.19465	0.643425
Gfod1	0.0316256	0.411133	1.61291	0.0316256	2.17723	0.626804
Sepp1	0.0316256	0.569261	1.07527	0.0316256	2.17521	0.62536
D17H6S53E	0.0316256	0.569261	1.04365	0.0316256	2.16259	0.619756
Heph	0.474384	5.56611	7.11576	0.474384	2.15893	0.619357
Ciart	0.284631	5.97724	7.62177	0.284631	2.15729	0.619357
Myo18a	0.284631	5.78749	7.21064	0.284631	2.15446	0.616395
Trp53rkb	0.379507	3.35232	5.37635	0.379507	2.15116	0.613087
Slc38a9	0.316256	5.47123	7.14739	0.316256	2.14171	0.602551
Stk11	0.474384	5.1866	6.35675	0.474384	2.12611	0.586063
Dhx33	0.0316256	5.43961	6.89438	0.0316256	2.12427	0.584815
Rnd3	0.221379	6.2935	7.40039	0.221379	2.12253	0.582498
Rpgrip1	0.0316256	0.695764	1.42315	0.0316256	2.11649	0.580784
Sult1a1	0.158128	2.02404	7.7799	0.158128	2.11617	0.580784
Spg7	0.316256	6.10374	7.27389	0.316256	2.11214	0.57782
Peg12	0.0632512	4.90197	5.43961	0.0632512	2.11155	0.57782
Hscb	0.50601	4.52246	6.79951	0.50601	2.11108	0.57782
Atad3a	0.126502	1.64453	7.55852	0.126502	2.10926	0.577161
Cntn1	0.189754	7.08414	7.6534	0.189754	2.10135	0.565927
Nkain4	0.0316256	0.664138	1.29665	0.0316256	2.10075	0.565927
Exoc3	0.189754	5.91399	7.62177	0.189754	2.0988	0.563658
Coq10b	0.189754	6.83113	7.68502	0.189754	2.09297	0.560483
Slc39a5	0	0.284631	1.13852	0	2.09188	0.560483
Bysl	0.221379	5.02847	6.38837	0.221379	2.09014	0.559234
Slc37a3	0	0.0948768	6.23025	0	2.07935	0.548714
Timmdc1	0.0316256	0.664138	1.54966	0.0316256	2.07551	0.548714
Acy1	0.158128	6.10374	7.5269	0.158128	2.07502	0.548714
Dnajb1	0.158128	6.10374	7.62177	0.158128	2.07306	0.545854
Ogg1	0	0.126502	5.37635	0	2.0692	0.540243
BC024978	0.0632512	4.49084	5.15498	0.0632512	2.06592	0.535841
Lrrc59	0.126502	5.81911	7.71665	0.126502	2.06493	0.534979
Rqcd1	0.189754	5.97724	7.11576	0.189754	2.06189	0.532233
Cyth1	0.126502	5.62936	7.21064	0.126502	2.06096	0.532233
Mcmbp	0	0.600887	1.13852	0	2.0534	0.527563
Pros1	0.0948768	6.04049	7.40039	0.0948768	2.0409	0.512938
Rabep2	0.0316256	0.284631	6.5465	0.0316256	2.03504	0.50712
Zfp120	0	0.50601	5.40798	0	2.0334	0.50654
Casp6	0.0632512	5.69261	7.21064	0.0632512	2.03283	0.50654
Ap1g1	0.158128	4.9336	6.51488	0.158128	2.03252	0.50654
Map3k4	0.0948768	0.347882	6.76788	0.0948768	2.02618	0.503278
2310039H08Rik	0.0948768	6.73626	7.49527	0.0948768	2.02359	0.500659
Rnf40	0.0316256	5.47123	6.673	0.0316256	2.02077	0.49902
Tgfbr1	0.189754	4.9336	6.23025	0.189754	2.01664	0.49902
Rfc2	0.0632512	5.72424	7.55852	0.0632512	2.01586	0.49902
Tcp1	0	0.980394	1.89754	0	2.01567	0.49902
Csnk1e	0.0948768	5.50286	6.73626	0.0948768	2.01496	0.49902
Tubgcp4	0	0.158128	6.64138	0	2.00793	0.49405
Eno1b	0	0.759015	1.39153	0	2.0073	0.49405
Mus81	0.0316256	5.69261	7.14739	0.0316256	2.00313	0.493979
Spry2	0	0.50601	0.980394	0	2.00283	0.493979
Nop9	0.126502	5.94562	6.5465	0.126502	1.99966	0.493979
Il17re	0	1.07527	2.05567	0	1.98881	0.479928
Dip2a	0	0.126502	6.51488	0	1.98765	0.478612
Dst	0	0.600887	1.17015	0	1.98397	0.475189
Hist2h2bb	0	0.189754	0.695764	0	1.98391	0.475189
Fam136a	0.0316256	5.81911	7.11576	0.0316256	1.97853	0.47092
Krba1	0.0316256	5.50286	6.673	0.0316256	1.97821	0.47092
Prpf38a	0	0.158128	1.26502	0	1.97233	0.468138
2020-09-10	0	5.78749	6.5465	0	1.96898	0.46589
Usp26	0	1.07527	5.53448	0	1.96275	0.464525
Arih1	-0.0316256	0.284631	4.83872	0	1.95961	0.458993
Cep19	-0.0316256	0.0632512	6.38837	0	1.95541	0.456009
Hjurp	-0.0316256	4.68059	5.37635	0	1.95517	0.456009
Cnnm4	-0.0316256	4.64897	5.43961	0	1.95513	0.456009
Pomt2	-0.0316256	5.56611	6.98926	0	1.9505	0.450347
Foxo1	-0.0316256	0.569261	5.21823	0	1.94983	0.450241
Cdkn2aip	-0.0316256	0.50601	1.01202	0	1.94438	0.445083
Fut11	-0.0632512	6.07212	7.02089	0	1.93357	0.434365
Trmt10c	-0.0632512	6.04049	7.30552	0	1.93329	0.434365
Synj2bp	-0.0316256	0.50601	0.980394	0	1.93211	0.433978
Tmem120b	-0.0316256	0.126502	6.79951	0	1.9297	0.429938
Gnl1	-0.0948768	5.72424	7.40039	0	1.91275	0.41492
Tmem126b	-0.0948768	6.32512	7.62177	0	1.90965	0.409431
Fn3k	-0.158128	5.3131	6.673	0	1.90236	0.40461
Adprm	-0.158128	5.37635	6.92601	0	1.8995	0.403269
Pvrl1	-0.0316256	0.474384	2.02404	0	1.89824	0.401622
Zfp266	-0.0316256	0.474384	4.58571	0	1.89636	0.399728
Gtf2h2	-0.126502	5.3131	6.89438	0	1.89591	0.399728
Ppp2ca	-0.0632512	1.45478	2.94118	0	1.89463	0.399203
Amigo1	-0.158128	5.81911	7.21064	0	1.89387	0.399203
Fam174a	-0.126502	5.91399	7.21064	0	1.89373	0.399203
Phax	-0.0948768	1.80266	7.7799	0	1.88885	0.394759
Tmem47	-0.0316256	0.632512	1.29665	0	1.88743	0.394759
Gatad1	-0.0316256	0.695764	3.32069	0	1.88734	0.394759
Tsku	-0.0316256	0.50601	0.980394	0	1.88258	0.390678
Snx13	-0.189754	5.53448	7.17901	0	1.88023	0.388508
Pold2	-0.126502	1.92916	7.59015	0	1.878	0.385947
Pacsin2	-0.126502	5.56611	7.40039	0	1.87217	0.383101
Fzd1	-0.0948768	1.39153	7.7799	0	1.86941	0.381661
Nedd4l	-0.221379	5.85074	6.673	0	1.86606	0.37749
E530011L22Rik	-0.0316256	0.442759	5.28148	0	1.86311	0.376166
Slc4a2	-0.189754	0.158128	6.98926	0	1.86018	0.375505
C2cd5	-0.221379	6.04049	7.11576	0	1.85751	0.375505
Fam107a	-0.0632512	0.600887	1.2334	0	1.85562	0.375505
Phlpp2	-0.0316256	0.0948768	5.43961	0	1.85521	0.375505
Ank3	-0.0632512	0.79064	5.37635	0	1.85492	0.375505
Ahdc1	-0.0316256	0.537635	1.04365	0	1.85258	0.375505
Atpaf1	-0.158128	6.00887	7.5269	0	1.85141	0.375505
Jkamp	-0.0632512	0.632512	1.29665	0	1.84795	0.372239
Tmem62	-0.158128	5.66099	7.71665	0	1.84241	0.365642
Appl2	-0.0632512	0.50601	1.01202	0	1.84096	0.365642
Ccni	-0.284631	6.19862	6.95764	0	1.84079	0.365642
Dopey1	-0.0316256	0.253005	6.10374	0	1.83755	0.365008
Nnat	-0.189754	5.66099	7.30552	0	1.83603	0.365008
Hnrnpr	-0.253005	6.13537	7.33714	0	1.83396	0.362552
Mrps30	-0.189754	6.2935	7.62177	0	1.83266	0.361045
Samd4	-3.16256	0.474384	3.38394	0	1.83121	0.360653
Mrps31	-0.221379	6.89438	7.5269	0	1.82701	0.359258
2510002D24Rik	-0.0632512	4.17458	5.40798	0	1.82348	0.35534
Sowahc	-0.284631	5.81911	7.02089	0	1.82142	0.354705
Fbxo28	-0.221379	5.75586	7.21064	0	1.82035	0.354289
Tmprss13	-0.0632512	0.50601	1.07527	0	1.81653	0.352872
Ptbp1	-0.253005	5.78749	7.24227	0	1.8153	0.352872
Slc27a4	-0.253005	5.34473	6.51488	0	1.81341	0.352543
Samd4b	-0.0632512	0.189754	6.35675	0	1.81061	0.349334
Chd9	-0.189754	2.08729	7.14739	0	1.81051	0.349334
Itfg3	-0.189754	5.88236	8.12778	0	1.80973	0.349334
Ripply3	-0.0632512	0.600887	4.80709	0	1.80811	0.346783
Prpf38b	-0.379507	6.167	6.92601	0	1.80503	0.341116
U2surp	-0.158128	1.64453	3.60532	0	1.80288	0.340801
Pdlim7	-0.316256	5.47123	7.21064	0	1.80277	0.340801
Iffo1	-0.379507	5.37635	6.76788	0	1.79137	0.326591
Ccdc25	-0.379507	5.37635	6.673	0	1.78809	0.325151
Camk1d	-0.379507	5.72424	6.92601	0	1.788	0.325151
Crtap	-0.284631	5.50286	7.05251	0	1.7877	0.325151
Paqr6	-0.221379	2.11892	3.47882	0	1.78584	0.322979
Zic3	-0.0632512	0.379507	2.11892	0	1.78289	0.320006
Pigf	-0.0632512	0.0316256	6.673	0	1.78027	0.317393
Mar-02b	-0.0948768	0.664138	1.58128	0	1.77835	0.316919
Fam103a1	-0.379507	6.42	7.24227	0	1.77795	0.316919
Zbtb44	-0.0632512	0.474384	0.948768	0	1.77793	0.316919
Prnp	-0.0632512	0.347882	0.727389	0	1.77689	0.315591
Safb2	-0.0948768	0.126502	6.95764	0	1.77331	0.313323
Scrg1	-0.0632512	0.569261	1.17015	0	1.7707	0.311323
Vps39	-0.284631	5.66099	6.98926	0	1.76871	0.310762
Tbc1d23	-0.316256	5.40798	6.70463	0	1.76816	0.310762
Mterf4	-0.316256	1.51803	7.11576	0	1.76749	0.310762
Pdcd4	-0.0632512	0.50601	1.01202	0	1.7665	0.310762
D630003M21Rik	-0.0632512	0.474384	5.1866	0	1.76626	0.310762
Ptprf	-0.316256	6.23025	7.59015	0	1.76625	0.310762
Npm3-ps1	-0.0948768	0.664138	5.43961	0	1.76535	0.309727
Bcar1	-0.537635	6.2935	7.11576	0	1.76458	0.308953
Crbn	-0.316256	6.00887	7.36877	0	1.75998	0.305186
Inpp4a	-0.0632512	0.50601	1.07527	0	1.75833	0.305186
Scrn3	-1.1069	0.189754	6.42	0	1.75827	0.305186
Cul4a	-0.0632512	0.0316256	6.51488	0	1.7518	0.299219
Fbxl3	-0.316256	2.75143	5.85074	0	1.74987	0.298139
Ppif	-0.284631	1.70778	7.6534	0	1.74797	0.298053
Ept1	-0.316256	5.59773	7.17901	0	1.74531	0.295963
Dcps	-0.0632512	0.0316256	7.02089	0	1.74514	0.295963
Chrm4	-0.126502	0.759015	5.53448	0	1.74193	0.293822
Kti12	-0.50601	0.158128	6.23025	0	1.74132	0.293369
Acot11	-0.158128	0.980394	2.15054	0	1.74006	0.292429
Igbp1	-0.411133	5.50286	6.64138	0	1.7324	0.283426
Gpld1	-0.0948768	0.569261	1.17015	0	1.73153	0.282714
Mllt10	-0.442759	2.02404	7.30552	0	1.7311	0.282649
Cpeb3	-0.695764	6.10374	6.79951	0	1.72542	0.275577
Mad2l1bp	-0.442759	5.47123	6.98926	0	1.7208	0.269305
Chrac1	-0.411133	5.78749	7.30552	0	1.72021	0.269305
Arfgap1	-0.347882	5.72424	7.11576	0	1.72013	0.269305
Ankib1	-0.664138	4.9336	6.57813	0	1.71695	0.264071
Znrf1	-0.537635	4.90197	6.19862	0	1.71605	0.264071
Pigc	-0.347882	5.78749	7.68502	0	1.71414	0.264071
Zfp160	-0.537635	5.43961	6.57813	0	1.71147	0.259133
Ube2g2	-0.316256	6.167	7.81153	0	1.71037	0.258764
Sparc	-0.284631	1.77103	6.73626	0	1.70544	0.253973
Ptchd1	-0.0632512	0.411133	0.885517	0	1.70392	0.253045
Mmrn2	-0.126502	0.759015	5.12335	0	1.70227	0.250316
Phyhd1	-0.347882	7.11576	7.71665	0	1.69922	0.250264
Trip4	-0.0948768	0.442759	4.87034	0	1.69882	0.250264
Zfp367	-1.99241	0.284631	6.10374	0	1.69837	0.250264
Gtf2i	-0.126502	0.727389	1.77103	0	1.69752	0.250264
Mfsd2b	-0.0948768	0.379507	3.09931	0	1.69375	0.249373
Nacc1	-0.474384	4.99685	6.38837	0	1.69326	0.249373
Fgd6	-0.379507	1.80266	6.04049	0	1.6931	0.249373
Gdap2	-0.158128	0.0632512	6.51488	0	1.68311	0.234968
Mrps22	-0.474384	6.42	7.46365	0	1.6822	0.234681
Gm5512	-0.917143	3.88995	6.57813	0	1.68108	0.233978
Gnpnat1	-0.695764	5.75586	6.79951	0	1.68033	0.233978
Ppm1g	-1.04365	0.126502	6.32512	0	1.67833	0.232311
Mapk1ip1	-0.347882	1.96079	4.04808	0	1.67709	0.232311
Tlk1	-0.695764	0.0948768	6.35675	0	1.67571	0.232311
Extl1	-0.0632512	0.0632512	6.19862	0	1.67438	0.231851
Cops7a	-0.221379	1.04365	2.75143	0	1.67391	0.231759
Igsf3	-0.0948768	0.411133	5.0601	0	1.66841	0.226656
Polg	-0.664138	5.62936	6.92601	0	1.66756	0.226213
Pla2g7	-0.0632512	0.347882	0.759015	0	1.66343	0.219653
Ppp1r15b	-0.379507	5.47123	7.27389	0	1.6626	0.219512
Gria2	-0.126502	0.600887	1.32828	0	1.65971	0.216498
Arl16	-0.253005	0.632512	5.78749	0	1.65917	0.216481
Zfp444	-0.0948768	0.474384	1.01202	0	1.65759	0.215173
Rpe	-0.632512	0.284631	5.88236	0	1.65696	0.214628
Bean1	-0.158128	0.632512	5.40798	0	1.6523	0.210843
Ccnk	-0.50601	0.253005	6.04049	0	1.65104	0.210843
Irak2	-0.158128	0.79064	1.61291	0	1.6507	0.210843
R3hdm1	-0.50601	5.75586	7.02089	0	1.64845	0.208367
Tmem259	-0.695764	6.00887	7.17901	0	1.64499	0.205643
Setd3	-0.347882	1.67616	3.03606	0	1.64362	0.205125
Tbc1d9b	-0.79064	5.59773	6.64138	0	1.64263	0.205125
Kdelc2	-0.569261	3.85833	5.09172	0	1.63872	0.201806
Uroc1	-0.189754	0.822266	2.02404	0	1.63738	0.201541
Rab12	-0.569261	3.9532	5.12335	0	1.63048	0.195451
E130008D07Rik	-0.50601	1.73941	3.88995	0	1.62839	0.193702
Ccbl2	-0.600887	5.78749	7.11576	0	1.62686	0.191136
Iqsec1	-0.0948768	0.474384	1.01202	0	1.62472	0.189405
Ppp2r3c	-0.50601	5.97724	7.17901	0	1.62256	0.189405
Zfp768	-3.8267	0.158128	5.88236	0	1.62243	0.189405
B4galt6	-0.0948768	0.411133	0.917143	0	1.61145	0.176476
A630072M18Rik	-0.759015	3.54207	4.83872	0	1.6086	0.175709
Tmem59	-0.126502	0.442759	0.948768	0	1.60829	0.175709
Ugt1a6a	-0.411133	1.83429	3.19419	0	1.6073	0.175709
Ctnnb1	-1.51803	0.0948768	6.95764	0	1.6071	0.175709
Clcn2	-0.442759	1.96079	3.57369	0	1.60632	0.17498
1700019G17Rik	-0.411133	1.77103	3.13094	0	1.59585	0.161922
Cdv3	-0.126502	0.474384	1.04365	0	1.59517	0.161226
Vps53	-1.01202	5.37635	6.64138	0	1.59265	0.159573
Dhodh	-0.0948768	0.0948768	6.95764	0	1.59238	0.159573
Timm10	-0.632512	6.60975	7.40039	0	1.58982	0.158982
1700042G15Rik	-0.189754	0.632512	5.28148	0	1.58892	0.158505
Slc25a51	-0.537635	3.19419	6.04049	0	1.58788	0.158225
Mir3064	-0.316256	4.64897	5.34473	0	1.58616	0.157113
Npas2	-0.537635	4.64897	5.72424	0	1.5773	0.15003
Sdhaf4	-0.474384	1.32828	6.79951	0	1.57331	0.144278
Psme2	-0.411133	1.58128	7.87478	0	1.57245	0.143123
Btf3l4	-0.379507	1.54966	3.00443	0	1.5713	0.142141
Rasa1	-0.284631	0.0632512	6.13537	0	1.56876	0.140969
Zfhx2	-0.727389	5.28148	6.60975	0	1.56764	0.140969
2010012O05Rik	-0.126502	0.442759	1.01202	0	1.56761	0.140969
Lrrc4b	-0.316256	0.853892	3.41557	0	1.56641	0.139859
Gsk3b	-0.126502	0.442759	0.980394	0	1.56131	0.133924
4933407L21Rik	-0.126502	0.0632512	6.51488	0	1.55748	0.129246
Fkbp7	-0.632512	5.62936	7.27389	0	1.55512	0.127991
Bicd2	-0.537635	1.70778	7.71665	0	1.55278	0.12512
1700071M16Rik	-0.442759	1.1069	5.53448	0	1.5502	0.124623
Gm7367	-1.54966	3.7002	6.42	0	1.54706	0.121441
Stag2	-2.43517	0.221379	5.94562	0	1.54512	0.120301
Mief2	-0.126502	0.442759	4.45921	0	1.54482	0.120301
Bap1	-0.632512	5.59773	7.43202	0	1.54228	0.118796
Tmem185b	-0.569261	6.64138	7.40039	0	1.54208	0.118796
Stau1	-0.50601	1.54966	7.68502	0	1.54144	0.118787
Jade1	-0.379507	0.347882	1.26502	0	1.54134	0.118787
Mrpl47	-0.632512	2.05567	7.55852	0	1.53908	0.118191
Npas3	-0.284631	0.885517	1.89754	0	1.53743	0.117452
Ids	-0.664138	5.43961	7.05251	0	1.53577	0.116946
Aldoart2	-0.0948768	0.253005	0.948768	0	1.53099	0.110012
Ehmt1	-0.885517	5.66099	6.70463	0	1.53	0.109317
Srp54c	-0.379507	1.20177	3.03606	0	1.527	0.106403
Crls1	-1.80266	4.64897	6.26187	0	1.52444	0.104451
Atxn7l3	-0.347882	0.126502	5.69261	0	1.52255	0.102465
Ccnd1	-0.126502	0.0948768	7.05251	0	1.51894	0.0985454
Slc4a3	-0.79064	5.59773	6.5465	0	1.51878	0.0985454
Med16	-0.347882	4.17458	4.96522	0	1.51793	0.097387
Ifrd1	-0.569261	1.54966	7.5269	0	1.51443	0.0951755
Dnajc30	-0.632512	5.85074	7.55852	0	1.49752	0.0866202
Hnmt	-0.537635	1.4864	3.79507	0	1.4971	0.0866202
Nuak2	-0.347882	4.42759	5.02847	0	1.49671	0.0866202
Tmem131	-1.01202	5.81911	6.92601	0	1.49419	0.0859812
Zbtb5	-0.0632512	0.126502	5.75586	0	1.49253	0.0849444
Gm9696	-0.158128	0.316256	2.05567	0	1.4914	0.0849444
Strbp	-0.158128	0.379507	4.74384	0	1.49097	0.0849444
Bcl11b	-0.316256	0.727389	1.92916	0	1.48673	0.0803495
Arf6	-1.13852	6.13537	6.70463	0	1.48645	0.0803495
Vsx1	-0.158128	0.316256	2.11892	0	1.48523	0.0792892
Lrrfip2	-0.158128	0.0632512	6.2935	0	1.48467	0.0792892
Mbtps2	-0.727389	2.65655	5.97724	0	1.48224	0.075983
Rcn2	-0.158128	0.474384	1.04365	0	1.48176	0.0756393
Il17rc	-3.13094	0.0948768	6.42	0	1.48036	0.0734027
Papd5	-0.537635	4.55409	6.13537	0	1.48012	0.0734027
Rps6kb2	-0.664138	5.59773	7.14739	0	1.47924	0.0721295
Pecr	-0.158128	0.0632512	6.32512	0	1.47485	0.0695485
Pbxip1	-0.347882	0.885517	1.86591	0	1.47375	0.0687032
Ntmt1	-0.569261	1.45478	7.71665	0	1.47365	0.0687032
Prkd3	-3.88995	0.284631	5.88236	0	1.47306	0.0687032
Lrif1	-0.980394	0.0632512	6.2935	0	1.4711	0.065464
Hs6st1	-2.53005	0.253005	6.04049	0	1.46828	0.063559
Hmox2	-0.664138	6.07212	7.14739	0	1.46708	0.063559
Cacul1	-1.04365	5.0601	6.64138	0	1.46448	0.0614237
Rasl11a	-0.0948768	0.0948768	5.62936	0	1.46043	0.0595885
Sec22b	-0.569261	1.29665	6.86276	0	1.45899	0.0595885
Fam126b	-0.917143	5.97724	6.673	0	1.45759	0.0595885
Tns3	-1.04365	2.15054	6.73626	0	1.45613	0.0595885
Musk	-0.189754	4.58571	5.12335	0	1.45567	0.0595885
Rwdd4a	-1.01202	0.0948768	6.79951	0	1.45424	0.0588262
Mr1	-0.727389	1.45478	7.24227	0	1.45374	0.0588262
Commd5	-0.79064	5.56611	7.11576	0	1.45007	0.0548114
Zmat2	-0.158128	0.411133	1.01202	0	1.4457	0.0499136
Uvrag	-0.0632512	0.221379	3.79507	0	1.44492	0.0499058
Fam212b	-0.727389	3.60532	5.78749	0	1.44266	0.0492673
Ccdc141	-0.50601	1.07527	3.00443	0	1.43946	0.0474486
Fam84a	-0.885517	5.59773	7.02089	0	1.43806	0.0474486
Pdap1	-1.13852	6.26187	6.98926	0	1.43734	0.0474486
Trappc13	-0.284631	0.727389	2.56167	0	1.4368	0.0474486
Mthfd2l	-0.727389	4.45921	5.56611	0	1.4367	0.0474486
Map2k7	-1.54966	4.74384	6.13537	0	1.43643	0.0474486
2810459M11Rik	-0.695764	5.53448	7.21064	0	1.43643	0.0474486
Kansl1l	-1.2334	5.81911	6.51488	0	1.43234	0.0431163
Fam179b	-0.0632512	0.0948768	5.50286	0	1.42866	0.0387309
Basp1	-0.126502	0.253005	0.917143	0	1.42779	0.0387309
Spg21	-0.600887	1.58128	3.09931	0	1.42695	0.0386612
Yipf2	-0.853892	5.43961	6.60975	0	1.42666	0.0386612
Ppat	-4.11133	0.189754	3.85833	0	1.42524	0.0364771
1700037H04Rik	-0.0632512	0	5.97724	0	1.42454	0.0359673
Caprin1	-0.50601	1.26502	3.09931	0	1.42157	0.0338063
AI450353	-0.158128	0.379507	4.64897	0	1.41945	0.0321363
Parp12	-0.695764	6.167	7.5269	0	1.41524	0.0302828
Prpf19	-0.474384	0.822266	3.54207	0	1.41249	0.0289686
Cux1	-0.347882	0.759015	3.25744	0	1.41109	0.0284654
4933434E20Rik	-0.537635	1.26502	2.94118	0	1.41045	0.0284654
Meg3	-0.347882	0.853892	1.89754	0	1.40997	0.0280628
Pou4f1	-0.347882	0.822266	1.83429	0	1.40766	0.027892
Eef1g	-0.664138	1.58128	2.87793	0	1.40614	0.027892
C1d	-0.537635	1.17015	2.90956	0	1.40444	0.027892
Dhrs4	-0.759015	5.78749	7.59015	0	1.40081	0.0277667
Xpot	-0.695764	1.67616	3.06768	0	1.39912	0.0277667
Rmnd1	-0.759015	5.85074	7.62177	0	1.3987	0.0277667
Ndrg2	-0.126502	0.316256	0.727389	0	1.39861	0.0277667
Cyth3	-0.189754	0.0632512	6.98926	0	1.39696	0.0277667
Rit1	-0.632512	5.75586	7.27389	0	1.39662	0.0277667
Tcf7l2	-0.189754	0.474384	1.1069	0	1.39366	0.0248309
Ifit3	-0.822266	5.72424	6.57813	0	1.39264	0.024752
Tmem243	-0.158128	0.347882	4.90197	0	1.39153	0.0242528
Rnf126	-2.37192	0.126502	6.64138	0	1.38971	0.0242528
Fgf16	-0.284631	0.632512	1.58128	0	1.38968	0.0242528
Txnl4b	-0.189754	0.411133	0.980394	0	1.38963	0.0242528
Zfp579	-1.51803	5.12335	6.89438	0	1.38731	0.0239208
Hyls1	-0.284631	0.632512	1.61291	0	1.38272	0.0205854
Lsm4	-0.569261	1.2334	3.19419	0	1.38185	0.0205854
Aftph	-2.56167	0.253005	5.0601	0	1.38182	0.0205854
Hcfc2	-4.23783	0.0948768	6.2935	0	1.38032	0.0188332
Tanc2	-1.20177	5.85074	6.98926	0	1.37986	0.0184571
Cenpb	-0.0948768	0.0948768	5.15498	0	1.37555	0.0106935
Lime1	-0.79064	1.32828	7.27389	0	1.37035	0.00826453
Wbp1l	-3.54207	5.62936	6.51488	0	1.36906	0.00666689
Btbd3	-1.45478	5.56611	6.64138	0	1.36844	0.0065935
Tmem67	-0.0948768	0.0632512	5.66099	0	1.36379	0.00436677
Lgi1	-0.347882	0.695764	2.43517	0	1.36185	0.00436677
Trappc3	-0.695764	1.29665	3.06768	0	1.36158	0.00436677
Foxp2	-0.316256	0.695764	1.86591	0	1.36105	0.00436677
Alpk3	-0.284631	0.600887	1.58128	0	1.361	0.00436677
Rpf1	-0.948768	5.85074	6.86276	0	1.3601	0.00436677
Selm	-0.411133	0.79064	2.97281	0	1.35904	0.00405243
Arhgef17	-0.695764	1.58128	2.94118	0	1.35548	0.00301798
Decr2	-0.221379	0.474384	1.17015	0	1.35483	0.00301798
Usb1	-0.0632512	0.0948768	5.59773	0	1.35306	0.00174683
Gm11627	-0.917143	1.67616	3.54207	0	1.35144	0.000749883
Gspt1	-0.980394	5.72424	6.95764	0	1.35097	0.000653517
Rhbdd1	-0.79064	5.94562	7.21064	0	1.34775	0
Zfp788	-1.73941	5.94562	6.48325	0	1.34749	0
Ficd	-0.727389	5.69261	7.46365	0	1.34674	0
Hmgcs2	-0.0948768	0.0632512	1.29665	0	1.34552	0
Itgb1bp1	-0.664138	1.4864	3.19419	0	1.34522	0
Zfp942	-0.980394	5.72424	6.86276	0	1.34243	0
Brox	-0.853892	1.26502	7.02089	0	1.34009	0
Mir29c	-0.126502	0.189754	0.917143	0	1.33671	0
Ano6	-0.189754	0.379507	0.917143	0	1.33595	0
Cep97	-0.189754	0.411133	0.885517	0	1.33587	0
Mrps28	-1.01202	1.4864	7.08414	0	1.33462	0
Ctif	-0.822266	0.158128	6.32512	0	1.33337	0
Pdcl3	-0.822266	5.50286	7.40039	0	1.33308	0
Igf2bp1	-0.126502	0.221379	0.822266	0	1.33211	0
Atraid	-0.189754	0.379507	1.04365	0	1.32438	0
Rrp8	-0.822266	1.01202	7.02089	0	1.32419	0
Kctd2	-0.0948768	0.189754	4.36433	0	1.32251	0
Sox11	-0.474384	0.379507	4.83872	0	1.31694	0
Gjc3	-0.50601	4.33271	4.96522	0	1.31672	0
Pam	-0.189754	0.347882	0.853892	0	1.31296	0
Gripap1	-4.30108	0.0948768	6.35675	0	1.31251	0
Slc25a15	-0.253005	0.0948768	6.5465	0	1.30376	0
Pxmp2	-0.79064	1.32828	3.19419	0	1.30257	0
Pigh	-0.632512	0.759015	6.92601	0	1.29962	0
Ube2w	-0.79064	1.42315	3.28906	0	1.29803	0
Ddx24	-0.79064	1.42315	3.32069	0	1.298	0
Ubl3	-0.316256	0.569261	1.70778	0	1.29789	0
Adam15	-1.45478	5.97724	7.08414	0	1.2953	0
Trmu	-0.948768	5.81911	7.11576	0	1.29475	0
Tmem230	-0.632512	1.01202	2.7198	0	1.29408	0
Rpl31-ps12	-0.917143	3.9532	4.9336	0	1.29318	0
Micu3	-0.284631	0.442759	3.8267	0	1.29224	0
Zkscan3	-0.917143	6.04049	7.02089	0	1.28914	0
Spon1	-0.632512	1.1069	2.5933	0	1.28854	0
Slitrk2	-0.189754	0.347882	0.885517	0	1.28745	0
Ccnh	-0.379507	0.632512	2.02404	0	1.28742	0
Aifm2	-3.98483	5.50286	6.51488	0	1.28704	0
Hmbs	-0.917143	1.45478	7.43202	0	1.28669	0
Atp6v0c-ps2	-0.221379	0.411133	1.01202	0	1.28642	0
Osgep	-0.664138	1.2334	3.03606	0	1.28628	0
Syn3	-0.379507	4.68059	5.1866	0	1.28418	0
Hltf	-0.0948768	0.0632512	5.47123	0	1.28393	0
Cog2	-0.695764	1.45478	3.35232	0	1.28284	0
Ctdsp1	-0.695764	1.29665	3.47882	0	1.28279	0
Bbs4	-4.71222	0.158128	6.13537	0	1.28202	0
Pdzd8	-0.189754	0.347882	1.04365	0	1.28181	0
Acss3	-0.0948768	0.126502	4.87034	0	1.28087	0
Orc4	-0.474384	0.759015	4.68059	0	1.2803	0
Slc35a5	-0.79064	1.42315	3.35232	0	1.27931	0
Kcnj16	-0.50601	0.853892	2.08729	0	1.27926	0
Mlycd	-0.79064	1.73941	3.06768	0	1.27853	0
Dock11	-3.09931	0.126502	6.60975	0	1.27762	0
Agpat5	-0.284631	0.50601	1.17015	0	1.2775	0
Zfp811	-0.284631	0.253005	1.51803	0	1.274	0
Nudt16	-4.64897	0.0948768	1.01202	0	1.2716	0
Arf4	-0.316256	0.50601	1.29665	0	1.26781	0
Snx5	-0.600887	0.885517	2.49842	0	1.26763	0
Arsa	-0.917143	1.54966	3.88995	0	1.26624	0
Wrb	-0.221379	0.379507	0.948768	0	1.26468	0
Dcaf7	-0.853892	1.39153	6.89438	0	1.26439	0
2810013P06Rik	-0.79064	1.99241	3.92158	0	1.26194	0
Ctbp2	-0.221379	0.379507	1.07527	0	1.26161	0
Gja5	-0.442759	0.759015	1.73941	0	1.26014	0
Atad2	-0.442759	0.600887	5.24985	0	1.25482	0
Zxda	-0.379507	1.13852	3.92158	0	1.25454	0
Tubd1	-0.0948768	0.0316256	4.71222	0	1.25379	0
Rapgef6	-0.253005	0.221379	5.34473	0	1.25319	0
Mrps18b	-0.980394	5.47123	6.95764	0	1.25305	0
Acnat1	-0.189754	0.347882	0.853892	0	1.25128	0
Pcsk6	-0.79064	0.822266	7.59015	0	1.24965	0
Tmppe	-0.189754	0.347882	0.853892	0	1.24867	0
9330136K24Rik	-0.442759	4.61734	5.15498	0	1.2475	0
Pigp	-0.347882	0.537635	1.58128	0	1.24713	0
Gm13375	-0.284631	4.52246	5.15498	0	1.2461	0
Rps15a-ps6	-0.853892	1.01202	5.3131	0	1.24429	0
Mob2	-1.1069	5.50286	6.76788	0	1.24289	0
Coro2b	-0.632512	1.3599	2.68818	0	1.24276	0
Naglu	-4.33271	0.0316256	6.98926	0	1.2424	0
Tcf20	-3.16256	5.85074	6.57813	0	1.24134	0
Rfwd3	-4.90197	0.253005	6.07212	0	1.24044	0
Slc23a2	-0.948768	1.39153	3.06768	0	1.23981	0
Mybl1	-0.221379	0.284631	4.96522	0	1.23974	0
Kctd3	-4.80709	0.0632512	6.10374	0	1.23904	0
Naf1	-1.04365	0.347882	3.88995	0	1.23817	0
Rbm28	-1.13852	3.03606	4.61734	0	1.2367	0
Ostm1	-0.727389	0.980394	7.24227	0	1.23116	0
C4b	-0.0948768	0.0316256	5.37635	0	1.2298	0
Gmfb	-0.664138	0.917143	3.44719	0	1.22902	0
Camk2n1	-0.316256	0.537635	1.42315	0	1.2286	0
Rbm15	-1.89754	0.600887	4.87034	0	1.22699	0
Pcsk2	-0.158128	0.189754	0.79064	0	1.22667	0
Ercc1	-0.948768	1.70778	3.19419	0	1.22595	0
Tbccd1	-4.11133	0	5.88236	0	1.22463	0
Slc25a25	-0.948768	5.81911	7.14739	0	1.22455	0
A230028O05Rik	-0.126502	0.126502	0.79064	0	1.22366	0
Bend4	-0.379507	0.600887	1.64453	0	1.22231	0
Cd59a	-0.442759	0.695764	1.73941	0	1.2208	0
Trp53inp1	-4.11133	0.0632512	6.38837	0	1.21771	0
Tubb6	-0.0948768	0	6.35675	0	1.2173	0
Ccbl1	-0.917143	1.4864	3.22581	0	1.21346	0
6030458C11Rik	-1.73941	4.04808	4.96522	0	1.20705	0
Nrip3	-0.189754	0.221379	1.3599	0	1.2019	0
Fbln5	-0.0948768	0.0632512	5.21823	0	1.20167	0
Zbtb7b	-0.0632512	0	6.51488	0	1.1966	0
Adgrb2	-0.79064	1.61291	3.13094	0	1.19651	0
Atl1	-0.0948768	0.0632512	4.96522	0	1.19545	0
Snx2	-0.79064	0.948768	2.5933	0	1.19233	0
Pstk	-1.4864	6.64138	7.21064	0	1.19141	0
Gm15446	-4.61734	0.411133	2.37192	0	1.19133	0
Zfyve27	-0.79064	1.07527	6.64138	0	1.1896	0
Serpina3n	-0.0948768	0	7.33714	0	1.18815	0
Prom1	-0.0632512	0.0316256	6.5465	0	1.188	0
Ska2	-0.0948768	0.0316256	5.40798	0	1.18441	0
Dnm1l	-0.664138	0.917143	2.43517	0	1.18298	0
Pgrmc2	-0.0948768	0.0632512	4.17458	0	1.18257	0
Fbxo4	-0.980394	1.13852	7.24227	0	1.18257	0
Myo1c	-0.853892	1.01202	5.43961	0	1.18104	0
Pla2g4b	-0.253005	0.221379	5.0601	0	1.18041	0
Ubn2	-0.379507	0.50601	3.88995	0	1.17943	0
Jph3	-0.221379	0.316256	0.79064	0	1.17938	0
Mif4gd	-0.853892	1.29665	2.75143	0	1.17936	0
Nrros	-3.79507	5.47123	6.5465	0	1.17882	0
Fut8	-0.347882	0.50601	1.26502	0	1.17838	0
Ifnar1	-0.221379	0.316256	0.822266	0	1.17782	0
Dhtkd1	-0.0948768	0	5.81911	0	1.1774	0
Haus8	-0.158128	0	7.02089	0	1.17699	0
Aprt	-1.51803	6.19862	7.08414	0	1.17638	0
Cdkn2aipnl	-4.11133	0.0632512	5.3131	0	1.17436	0
Sdhaf2	-0.600887	0.822266	2.43517	0	1.17252	0
Heatr5a	-0.695764	1.04365	5.1866	0	1.17174	0
Slc4a8	-1.54966	0.0316256	5.78749	0	1.17023	0
Armcx2	-2.65655	5.1866	6.673	0	1.17011	0
Rpl34-ps1	-0.379507	0.50601	1.77103	0	1.16859	0
Wdr6	-0.885517	0.853892	6.57813	0	1.16827	0
Phactr2	-0.221379	0.316256	0.853892	0	1.16787	0
Hdgf	-0.917143	1.3599	2.87793	0	1.16708	0
Chst2	-0.347882	0.474384	1.17015	0	1.16261	0
Cbx4	-0.0948768	0	6.51488	0	1.16196	0
Cyp4v3	-0.664138	0.0316256	7.14739	0	1.15926	0
Tmbim1	-0.411133	0.569261	1.70778	0	1.15918	0
Prmt1	-1.83429	3.25744	6.64138	0	1.15884	0
Sfr1	-0.822266	1.17015	2.97281	0	1.15525	0
Usf2	-4.33271	5.47123	6.57813	0	1.15494	0
Chmp4b	-1.26502	4.52246	6.07212	0	1.15492	0
Ganc	-0.0632512	0	6.64138	0	1.15442	0
Stat1	-3.98483	5.56611	6.19862	0	1.15431	0
Zfp251	-0.0948768	0.0632512	5.0601	0	1.15011	0
2010320M18Rik	-1.39153	5.47123	6.98926	0	1.14915	0
Rnf2	-0.980394	0.948768	6.73626	0	1.14622	0
Vmn2r29	-1.73941	0	5.85074	0	1.14498	0
Rbm4	-0.0948768	0.0316256	5.53448	0	1.14483	0
Tax1bp1	-0.600887	0.759015	2.62493	0	1.14352	0
Frat1	-0.221379	0.284631	4.90197	0	1.14322	0
Phip	-1.13852	1.64453	3.63695	0	1.14297	0
Eif3b	-0.917143	1.45478	3.00443	0	1.14154	0
Cmtr2	-4.96522	0.0632512	6.167	0	1.14074	0
Gpn3	-3.13094	0	6.23025	0	1.1404	0
Bnip2	-1.1069	5.66099	6.92601	0	1.14006	0
Katnb1	-4.64897	0.0632512	4.90197	0	1.1388	0
Rnf121	-0.126502	0	6.45163	0	1.13837	0
Vrk1	-0.158128	0.0632512	5.0601	0	1.13738	0
Phf21b	-2.24542	4.9336	6.32512	0	1.13614	0
Hopx	-4.36433	0.253005	5.72424	0	1.13424	0
Cyp4f40	-0.221379	0.221379	1.17015	0	1.13416	0
Macrod1	-0.474384	0.126502	5.12335	0	1.13271	0
Ctnnd1	-4.68059	0.158128	6.83113	0	1.13229	0
Nudc	-0.569261	0.632512	2.21379	0	1.13222	0
Tmem134	-1.17015	1.2334	7.43202	0	1.13171	0
Osbpl1a	-0.474384	0.537635	1.77103	0	1.12927	0
Srp54b	-0.664138	0.822266	2.7198	0	1.12924	0
AU022754	-0.316256	0.126502	5.81911	0	1.12749	0
Cd9	-0.600887	0.632512	2.21379	0	1.12704	0
Cbfb	-1.2334	0.980394	7.14739	0	1.12648	0
C920021L13Rik	-2.18217	3.7002	5.56611	0	1.12629	0
AI464131	-0.379507	0.50601	1.39153	0	1.12592	0
Zfp622	-0.158128	0	6.167	0	1.12583	0
Upf2	-3.76345	0.0632512	5.28148	0	1.12563	0
Klhl7	-2.84631	4.20621	5.02847	0	1.12537	0
Ints12	-1.01202	5.62936	7.27389	0	1.12307	0
Prkra	-5.0601	0.126502	6.23025	0	1.12125	0
Snx30	-0.822266	1.39153	4.04808	0	1.12124	0
9330151L19Rik	-4.61734	0.0948768	0.79064	0	1.12115	0
1700008J07Rik	-0.0948768	0.0632512	5.09172	0	1.12114	0
Crip2	-0.284631	0.379507	1.01202	0	1.11741	0
Tpgs2	-0.284631	0.347882	0.948768	0	1.11607	0
Gm13139	-3.28906	0.189754	2.11892	0	1.11603	0
Ikbip	-0.347882	0.442759	3.54207	0	1.11579	0
Dnajc10	-1.45478	5.37635	6.86276	0	1.11555	0
Cdk19	-4.01645	0.126502	5.69261	0	1.11349	0
Pgm2l1	-0.727389	0.411133	1.92916	0	1.11283	0
D11Wsu47e	-4.55409	0.0948768	5.21823	0	1.11241	0
Optn	-0.379507	0.0316256	6.70463	0	1.11037	0
Chchd6	-1.1069	5.69261	7.36877	0	1.10982	0
Cdc23	-1.13852	1.51803	8.06453	0	1.10966	0
Trim72	-0.474384	0.569261	1.70778	0	1.10883	0
4930539J05Rik	-0.664138	0.158128	4.55409	0	1.10869	0
Nfs1	-1.42315	5.94562	7.33714	0	1.10856	0
Ptbp2	-1.17015	1.17015	7.21064	0	1.10801	0
Ube2k	-1.26502	5.37635	6.42	0	1.10757	0
Lrrtm4	-0.442759	0.537635	1.58128	0	1.10653	0
Mknk2	-4.0797	0.284631	5.91399	0	1.10547	0
Adam22	-0.284631	0.253005	4.96522	0	1.10438	0
Inppl1	-1.13852	0.948768	6.57813	0	1.10346	0
Sox21	-0.980394	1.1069	3.03606	0	1.10287	0
Sobp	-4.23783	0.316256	1.39153	0	1.10261	0
Slbp	-0.885517	1.13852	2.90956	0	1.10248	0
Plxna3	-1.2334	0	6.07212	0	1.1021	0
Ctnna1	-0.632512	0.695764	2.3403	0	1.10083	0
Il1r1	-0.284631	0.221379	0.79064	0	1.10005	0
Gorab	-0.158128	0.0316256	6.167	0	1.09941	0
Oscp1	-1.26502	6.48325	7.30552	0	1.09855	0
Ewsr1	-0.569261	0.695764	2.15054	0	1.09569	0
Zfp871	-0.917143	1.1069	2.84631	0	1.095	0
Wdr36	-1.61291	0.0632512	6.26187	0	1.09489	0
Fam124a	-1.07527	0.0632512	6.00887	0	1.09422	0
Ccdc43	-0.126502	0	6.57813	0	1.0939	0
Kdm4c	-1.67616	5.37635	6.73626	0	1.09243	0
Gjb6	-0.253005	0.284631	0.759015	0	1.09231	0
Arhgap18	-3.63695	0.0316256	6.10374	0	1.09225	0
Chmp1b	-0.822266	0.980394	2.75143	0	1.09202	0
Katnal1	-0.79064	0.980394	4.45921	0	1.09117	0
Adora1	-1.01202	1.01202	7.46365	0	1.0896	0
Maf1	-0.569261	0.664138	1.67616	0	1.08808	0
AA387883	-0.158128	0	6.79951	0	1.08502	0
Zfhx3	-1.1069	0.284631	5.43961	0	1.08456	0
Prune2	-0.253005	0.316256	0.822266	0	1.08322	0
Ensa	-3.79507	5.50286	6.48325	0	1.08304	0
Calm2	-0.316256	0.379507	1.13852	0	1.08206	0
Cramp1l	-1.77103	2.40355	5.50286	0	1.08202	0
Xrcc6	-4.49084	0.0948768	6.2935	0	1.08119	0
Pomk	-1.1069	5.62936	6.64138	0	1.08118	0
B4galnt2	-0.79064	4.39596	5.1866	0	1.08025	0
Tmem237	-4.20621	0.158128	6.51488	0	1.08023	0
Ireb2	-1.29665	1.20177	6.48325	0	1.07937	0
P4ha1	-0.347882	0.442759	1.17015	0	1.07772	0
Usp25	-0.79064	0.253005	5.34473	0	1.07629	0
4930529C04Rik	-0.253005	0.284631	0.79064	0	1.07446	0
Csf1	-1.20177	5.78749	6.86276	0	1.07432	0
Kdm6a	-4.9336	0.0948768	6.42	0	1.07334	0
Cadm2	-0.411133	0.474384	1.2334	0	1.07243	0
Psmb2	-0.284631	0.316256	0.885517	0	1.07177	0
Ubb	-0.221379	0.253005	0.695764	0	1.07171	0
B230354K17Rik	-0.600887	3.8267	4.96522	0	1.0713	0
Stx8	-1.13852	1.17015	7.36877	0	1.07085	0
Rab24	-0.664138	0.600887	2.68818	0	1.07076	0
Gm8096	-0.50601	0.600887	1.77103	0	1.0706	0
Ddx25	-0.0632512	0.0316256	6.13537	0	1.06969	0
Col19a1	-0.221379	0.189754	0.980394	0	1.06851	0
Pitpnm2	-1.99241	1.13852	6.70463	0	1.06631	0
4931406P16Rik	-3.38394	0.0316256	5.59773	0	1.06578	0
Kdm6b	-0.253005	0.316256	0.822266	0	1.06231	0
Soga3	-0.853892	0.853892	2.97281	0	1.06227	0
Mcu	-0.50601	0.569261	2.02404	0	1.06208	0
Kansl2	-0.600887	0.600887	1.58128	0	1.06193	0
Fam120a	-0.917143	0.695764	3.63695	0	1.06058	0
Atp11a	-1.2334	1.58128	3.66857	0	1.05995	0
Gca	-1.01202	0.948768	3.25744	0	1.05983	0
Clybl	-0.822266	0.853892	3.00443	0	1.05823	0
Stat5b	-3.09931	5.66099	6.38837	0	1.05732	0
Usp54	-0.664138	0.853892	2.4668	0	1.0567	0
Samd8	-0.284631	0.284631	4.71222	0	1.05562	0
Pou3f2	-0.284631	0.316256	0.917143	0	1.05509	0
Gm9855	-1.45478	5.72424	6.60975	0	1.05391	0
Smco1	-3.60532	4.33271	4.9336	0	1.05361	0
Tmem86a	-0.948768	0.632512	7.6534	0	1.05326	0
Cdk13	-4.0797	0.0948768	5.97724	0	1.05285	0
Chmp7	-1.04365	0.853892	7.49527	0	1.05237	0
Ccdc163	-3.92158	0.0316256	5.24985	0	1.05232	0
Smim3	-0.600887	0.569261	1.92916	0	1.05116	0
Gm13031	-1.13852	0	5.78749	0	1.04996	0
Inpp5f	-1.70778	4.83872	6.26187	0	1.04946	0
Commd7	-0.411133	0.284631	4.99685	0	1.04859	0
Olfr631	-0.284631	0.221379	1.83429	0	1.04737	0
Fam192a	-1.07527	1.32828	3.25744	0	1.04721	0
Top2b	-1.17015	1.04365	3.19419	0	1.0464	0
Tpp2	-4.30108	4.99685	6.10374	0	1.0456	0
Nprl3	-0.822266	0.411133	4.80709	0	1.04551	0
She	-0.189754	0.158128	0.695764	0	1.04318	0
Akap8	-0.411133	0.379507	4.42759	0	1.04201	0
Nrbp2	-1.61291	5.88236	6.83113	0	1.04191	0
Angel2	-0.316256	0.347882	0.980394	0	1.04177	0
Wnt7a	-0.442759	0.442759	1.39153	0	1.04122	0
Hemk1	-3.54207	0	6.00887	0	1.03778	0
Arpc1b	-0.284631	0.316256	0.822266	0	1.03707	0
Bcl2l13	-4.83872	0.0948768	6.13537	0	1.03549	0
Rhbdl1	-4.52246	0.0632512	5.56611	0	1.03531	0
Lrrc16a	-1.17015	1.29665	3.09931	0	1.03472	0
Nol10	-2.81468	2.53005	4.74384	0	1.03457	0
Pou3f3	-0.442759	0.474384	1.29665	0	1.03373	0
Agps	-4.11133	0	6.10374	0	1.03291	0
Git1	-4.30108	0.0632512	5.69261	0	1.03205	0
Ctrcos	-0.664138	0.664138	3.79507	0	1.03199	0
Lmbrd1	-0.316256	0.347882	1.01202	0	1.03173	0
Tmem170b	-0.316256	0.347882	0.948768	0	1.03006	0
Kif5b	-2.11892	3.09931	4.30108	0	1.02893	0
Chordc1	-1.26502	1.39153	3.13094	0	1.02835	0
Golph3	-0.79064	0.664138	2.3403	0	1.028	0
Zfp438	-5.34473	0.126502	6.51488	0	1.0273	0
Cenpf	-0.948768	0.600887	4.80709	0	1.02704	0
Agap2	-0.537635	4.52246	5.02847	0	1.02683	0
Pkn2	-1.86591	6.00887	6.76788	0	1.02632	0
Mmadhc	-0.980394	0.948768	2.65655	0	1.02473	0
Aldh1a1	-0.569261	0.50601	2.18217	0	1.02439	0
Frg1	-1.07527	1.04365	2.87793	0	1.02377	0
Hivep1	-4.26946	0.158128	6.167	0	1.02267	0
Erich1	-0.79064	0.474384	5.02847	0	1.02265	0
A830009L08Rik	-2.90956	0	5.21823	0	1.02099	0
Cep162	-4.30108	0.158128	3.60532	0	1.02031	0
Cnih1	-0.474384	0.474384	1.39153	0	1.01958	0
Firre	-1.26502	1.29665	3.06768	0	1.01889	0
Cideb	-0.632512	0.442759	2.7198	0	1.01817	0
Tiam2	-3.92158	0.126502	0.569261	0	1.01747	0
Snapc3	-1.3599	1.13852	7.21064	0	1.0166	0
H2-M2	-0.221379	0.189754	1.26502	0	1.0161	0
Dpf1	-0.253005	0.284631	0.759015	0	1.01548	0
Fbrs	-4.20621	0.253005	5.47123	0	1.0146	0
Srgap2	-3.32069	0.0632512	6.23025	0	1.01444	0
Pycrl	-1.07527	1.45478	2.75143	0	1.01428	0
D930020B18Rik	-0.221379	0.158128	5.3131	0	1.01334	0
H2-Q6	-0.158128	0.126502	0.600887	0	1.01318	0
Khk	-1.39153	6.167	6.98926	0	1.0121	0
Dkk3	-0.537635	0.50601	1.99241	0	1.00981	0
Trnt1	-1.26502	1.13852	6.98926	0	1.0093	0
Rint1	-2.27704	4.68059	5.21823	0	1.00818	0
Mpv17	-0.347882	0.379507	1.07527	0	1.00675	0
Rab3gap2	-1.17015	5.59773	6.70463	0	1.00497	0
BC003331	-3.92158	5.50286	6.673	0	1.00449	0
Sdhaf1	-3.73182	0	7.21064	0	1.00295	0
Tnfsfm13	-0.221379	0	6.19862	0	1.00228	0
E030003E18Rik	-0.727389	0.474384	3.35232	0	1.00201	0
Mrpl48	-0.822266	0.695764	2.11892	0	1.00193	0
Dlx3	-0.189754	0.126502	0.600887	0	1.0011	0
Wdr41	-4.11133	0.0948768	6.19862	0	1.00099	0
Bag5	-4.23783	5.40798	6.73626	0	1.00044	0
Ntpcr	-1.29665	5.72424	6.95764	0	1.00025	0
Pxk	-5.15498	0.0948768	6.83113	0	1.00024	0
Aak1	-1.04365	0.50601	4.49084	0	0.999801	0
Slc27a1	-0.284631	0.284631	0.917143	0	0.999568	0
Wdfy1	-0.284631	0.284631	0.79064	0	0.999354	0
Acot7	-2.87793	0.0632512	5.43961	0	0.998607	0
Utrn	-1.51803	4.58571	6.26187	0	0.998578	0
Capn7	-1.42315	0	7.21064	0	0.998554	0
Plek	-0.948768	0.885517	4.39596	0	0.997146	0
Sema4d	-1.17015	1.17015	3.32069	0	0.996089	0
Rdh14	-0.537635	0.50601	1.64453	0	0.995107	0
Tmf1	-0.316256	0.316256	0.917143	0	0.99437	0
Fut1	-0.284631	0.221379	1.39153	0	0.994218	0
Lamtor2	-0.885517	0.664138	2.75143	0	0.994186	0
Crym	-0.189754	0.158128	0.759015	0	0.992398	0
Fam227a	-0.284631	0.221379	4.9336	0	0.992104	0
Acp1	-1.13852	1.26502	2.62493	0	0.990374	0
Chd8	-1.64453	4.68059	6.673	0	0.989289	0
Nsmaf	-1.32828	1.3599	3.73182	0	0.988628	0
Sephs1	-4.9336	0.0316256	5.78749	0	0.988466	0
2610008E11Rik	-1.26502	1.07527	7.33714	0	0.9884	0
Cacnb4	-0.221379	0.126502	0.569261	0	0.988065	0
Larp4	-1.07527	0.727389	3.00443	0	0.986109	0
Mrpl41	-0.474384	0.411133	1.80266	0	0.98585	0
Mpp6	-4.68059	0.158128	6.673	0	0.985344	0
Jmjd1c	-1.77103	5.56611	6.48325	0	0.984919	0
Plekha3	-4.55409	0.221379	6.38837	0	0.98425	0
Ap2a1	-1.2334	1.01202	6.64138	0	0.983618	0
Dusp3	-0.316256	0.284631	1.04365	0	0.982541	0
Ctdspl	-1.51803	1.51803	4.45921	0	0.982318	0
Dnttip2	-1.80266	5.37635	6.5465	0	0.982183	0
Astn1	-0.727389	0.632512	2.53005	0	0.982152	0
Mtg2	-1.07527	1.17015	3.06768	0	0.981636	0
Zfp286	-5.09172	0.126502	6.86276	0	0.981392	0
Zfp260	-1.1069	1.1069	2.97281	0	0.981199	0
Adcyap1r1	-0.695764	0.727389	1.83429	0	0.979962	0
Utp23	-2.02404	3.16256	4.58571	0	0.979791	0
tdTomato	-0.253005	0.253005	0.759015	0	0.979769	0
Sh3rf1	-4.45921	0.221379	3.51044	0	0.979127	0
Btbd2	-1.42315	5.94562	6.89438	0	0.97804	0
2410089E03Rik	-0.379507	0	6.167	0	0.977279	0
Gnaq	-1.04365	0.822266	4.99685	0	0.977211	0
5930403L14Rik	-1.2334	1.17015	2.75143	0	0.977111	0
Il1bos	-0.442759	0	2.53005	0	0.977059	0
3110082J24Rik	-0.79064	0.50601	3.38394	0	0.97607	0
Iqcb1	-3.63695	0.0948768	4.42759	0	0.974342	0
Rmnd5b	-1.01202	0.664138	7.08414	0	0.973735	0
Spg20	-1.70778	0	6.00887	0	0.973238	0
Cers1	-0.537635	0.474384	1.45478	0	0.973105	0
Fkbp10	-1.17015	1.58128	2.87793	0	0.972555	0
Elmod3	-1.13852	0.442759	7.43202	0	0.972505	0
Ldb1	-1.42315	1.07527	3.00443	0	0.970641	0
Usp37	-0.316256	0.284631	0.853892	0	0.970236	0
Imp4	-1.29665	5.66099	7.14739	0	0.969928	0
Tmem189	-1.17015	0.948768	5.72424	0	0.96983	0
Ranbp9	-1.32828	0.632512	6.673	0	0.969057	0
Gm10767	-0.126502	0.0948768	0.822266	0	0.968289	0
Arrb1	-1.17015	1.29665	2.7198	0	0.967446	0
Sft2d2	-1.04365	1.29665	2.56167	0	0.966489	0
Kcnt1	-1.99241	0	5.66099	0	0.966466	0
Tle4	-1.13852	0.980394	3.25744	0	0.966375	0
Fuz	-4.58571	0.316256	6.45163	0	0.965689	0
Sdc4	-0.284631	0.284631	0.853892	0	0.965233	0
2010315B03Rik	-0.727389	0.347882	4.39596	0	0.964628	0
Itpripl1	-1.26502	0.980394	2.11892	0	0.962783	0
Znrf2	-0.189754	0.0948768	4.17458	0	0.962618	0
Cfap36	-1.20177	1.17015	3.22581	0	0.960672	0
Pcsk5	-0.158128	0.126502	0.600887	0	0.960662	0
A430105I19Rik	-2.49842	2.84631	6.07212	0	0.959688	0
Nqo1	-0.158128	0.0632512	6.19862	0	0.959481	0
Gm9079	-0.221379	0.158128	0.664138	0	0.958546	0
Pttg1	-0.411133	0.379507	1.1069	0	0.958348	0
Naa40	-0.474384	0.189754	5.91399	0	0.957814	0
Zscan22	-0.158128	0	5.37635	0	0.957048	0
Triap1	-1.61291	5.37635	6.38837	0	0.956593	0
M6pr	-0.569261	0.50601	1.67616	0	0.955662	0
Rpl14-ps1	-1.3599	1.61291	4.58571	0	0.955335	0
Ap1b1	-1.07527	0.885517	2.62493	0	0.955249	0
Tmbim6	-0.347882	0.316256	0.948768	0	0.953915	0
Phkg2	-1.01202	0.853892	2.81468	0	0.953723	0
Slc35d2	-0.569261	0.442759	5.12335	0	0.953083	0
Txlna	-1.1069	0.569261	7.43202	0	0.952636	0
Capzb	-0.411133	0.379507	1.26502	0	0.951749	0
Tmem86b	-4.36433	0.221379	4.45921	0	0.951553	0
Apba1	-4.39596	0.0948768	0.822266	0	0.951546	0
Snrnp27	-0.50601	0.411133	2.21379	0	0.951412	0
Prepl	-0.474384	0	6.167	0	0.950632	0
Gm166	-1.77103	5.91399	6.64138	0	0.950332	0
Wdr61	-0.632512	0.50601	1.92916	0	0.950191	0
Dnmt1	-0.158128	0.0316256	5.91399	0	0.949888	0
Eif4enif1	-2.87793	0.0948768	5.43961	0	0.949001	0
Ssfa2	-1.1069	1.01202	2.49842	0	0.94849	0
Megf10	-0.569261	0.50601	1.39153	0	0.947566	0
Tshz1	-4.11133	0.0632512	0.569261	0	0.946616	0
Alyref2	-0.253005	0.189754	4.71222	0	0.94591	0
4632415L05Rik	-2.27704	2.3403	4.77547	0	0.945661	0
Ythdf1	-4.36433	0	6.79951	0	0.94553	0
Clptm1	-0.379507	0.347882	1.2334	0	0.944387	0
Gps2	-1.45478	1.3599	7.36877	0	0.944348	0
Got1	-1.13852	1.26502	2.87793	0	0.943151	0
Nudcd1	-4.23783	0.253005	6.167	0	0.943104	0
Git2	-2.75143	2.94118	4.71222	0	0.942011	0
Rreb1	-3.85833	0.0316256	5.75586	0	0.94162	0
Fli1	-0.632512	0.569261	1.67616	0	0.94152	0
Ttc16	-0.442759	0.253005	0.980394	0	0.941134	0
Ubqln2	-0.379507	0.347882	1.01202	0	0.939584	0
Vdac3	-0.379507	0.347882	1.04365	0	0.939461	0
Nup93	-1.64453	0.917143	6.70463	0	0.939162	0
Asun	-4.68059	0.126502	6.07212	0	0.938133	0
Idh3g	-0.347882	0.316256	0.948768	0	0.938	0
Sec61g	-0.569261	0.411133	2.87793	0	0.936705	0
Ppp1r37	-4.49084	0	6.70463	0	0.935929	0
Snx11	-0.189754	0.0316256	5.40798	0	0.935895	0
Klhl25	-3.41557	0.0948768	5.88236	0	0.933957	0
Zbtb11	-3.35232	1.80266	6.04049	0	0.933326	0
Mrps9	-1.29665	1.29665	3.51044	0	0.932837	0
Gemin8	-2.3403	3.51044	4.55409	0	0.930543	0
Zc4h2	-5.21823	0.0632512	5.47123	0	0.92964	0
C2	-0.0948768	0	5.62936	0	0.929031	0
Eif2b4	-1.20177	1.26502	2.87793	0	0.928756	0
0610030E20Rik	-2.5933	4.90197	5.91399	0	0.928442	0
Ndufs4	-0.474384	0.411133	1.2334	0	0.928199	0
Nxf1	-0.664138	0.474384	2.02404	0	0.926815	0
Fam96b	-1.61291	0.853892	7.21064	0	0.926786	0
Fign	-0.632512	0.253005	1.89754	0	0.926695	0
Wapal	-0.411133	0.253005	4.26946	0	0.925356	0
Alkbh5	-0.316256	0.284631	0.853892	0	0.924007	0
Aurkaip1	-0.664138	0.442759	2.08729	0	0.923604	0
Sptlc1	-1.13852	1.04365	3.22581	0	0.923506	0
Lsm5	-2.05567	0.853892	4.30108	0	0.923261	0
Focad	-4.20621	0.221379	5.47123	0	0.921377	0
Btg2	-1.13852	1.01202	2.75143	0	0.921322	0
Sox5	-1.39153	1.07527	7.11576	0	0.920933	0
Rb1cc1	-3.16256	0.0632512	5.91399	0	0.920427	0
Rpf2	-1.45478	0.79064	6.98926	0	0.919791	0
Dolpp1	-1.17015	1.13852	2.94118	0	0.919658	0
Raph1	-5.09172	0.316256	0.980394	0	0.919552	0
Sin3b	-0.664138	0.50601	2.62493	0	0.919471	0
Chn1	-0.600887	0.442759	1.45478	0	0.918291	0
BC005537	-2.90956	0	5.53448	0	0.915034	0
Mpc2	-0.411133	0.347882	0.980394	0	0.914031	0
AU022252	-0.126502	0.0316256	5.53448	0	0.913871	0
Mir3472	-0.189754	0.0948768	0.569261	0	0.912635	0
Psmd13	-0.569261	0.442759	1.67616	0	0.911236	0
Ncl	-0.474384	0.347882	3.54207	0	0.910952	0
Nr2c1	-4.17458	0	5.47123	0	0.907809	0
Camk2a	-1.4864	1.1069	4.74384	0	0.906877	0
Cpe	-0.253005	0.221379	0.664138	0	0.906357	0
Speer5-ps1	-0.316256	0.189754	1.58128	0	0.905802	0
Mettl17	-1.29665	0	7.11576	0	0.905622	0
Scfd2	-1.20177	5.24985	6.76788	0	0.905361	0
Snord47	-0.253005	0	3.16256	0	0.904676	0
1110038F14Rik	-1.3599	0.727389	6.83113	0	0.90431	0
Slc25a39	-1.2334	0.885517	2.68818	0	0.903633	0
Setd1b	-2.75143	2.3403	6.00887	0	0.902299	0
Tpd52	-0.221379	-0.0316256	6.73626	0	0.902084	0
Derl2	-0.727389	0.537635	1.73941	0	0.901746	0
Spin1	-4.04808	5.81911	6.5465	0	0.901695	0
Asb6	-1.07527	0.347882	7.11576	0	0.900504	0
Tmem254c	-1.39153	1.42315	2.94118	0	0.900356	0
Rbm6	-1.64453	5.12335	6.5465	0	0.899849	0
Saal1	-0.126502	0.0316256	5.0601	0	0.899256	0
Mospd3	-1.39153	0.50601	7.27389	0	0.898808	0
Scand1	-1.51803	0.474384	3.54207	0	0.898194	0
Fkbp9	-0.284631	0	6.73626	0	0.898139	0
Arrdc3	-5.37635	0.189754	5.1866	0	0.894008	0
Pdik1l	-0.0948768	0	6.13537	0	0.893939	0
Tigd4	-0.569261	0.221379	1.01202	0	0.893813	0
Hectd2	-5.12335	0.0316256	4.45921	0	0.893561	0
Bptf	-1.67616	1.1069	3.03606	0	0.89153	0
Sgce	-1.13852	0.822266	5.43961	0	0.890862	0
Dynlt1c	-1.39153	0.917143	2.87793	0	0.89086	0
Prpf18	-3.98483	0.189754	5.50286	0	0.890838	0
Hmgn2	-0.569261	0.474384	1.3599	0	0.890184	0
Gpatch8	-1.4864	0.79064	6.83113	0	0.888345	0
Msl3l2	-4.49084	0	6.38837	0	0.888181	0
Fnip2	-0.79064	0.632512	2.02404	0	0.887955	0
Adipor1	-1.1069	0.759015	2.4668	0	0.886679	0
Ppp2cb	-3.47882	0	6.167	0	0.886007	0
Mrpl1	-2.43517	2.62493	5.34473	0	0.885652	0
Rgs7bp	-0.759015	0.50601	2.27704	0	0.885371	0
Tbx3	-0.189754	0.126502	0.600887	0	0.885364	0
Gpr107	-1.29665	0.822266	2.78305	0	0.884064	0
BC068281	-0.948768	0.221379	2.68818	0	0.883868	0
Ccdc91	-0.442759	0	6.48325	0	0.883641	0
Tbc1d13	-4.11133	0.221379	5.69261	0	0.883513	0
Klhl31	-0.284631	0.253005	0.727389	0	0.882938	0
Tmem205	-0.632512	0.442759	2.02404	0	0.882678	0
Fbxw5	-1.17015	0.980394	2.7198	0	0.88179	0
Dstn	-0.822266	0.537635	1.99241	0	0.881238	0
Hspa8	-0.253005	0.221379	0.664138	0	0.881162	0
Skiv2l2	-4.45921	0.189754	5.94562	0	0.879126	0
Usp48	-4.52246	0.316256	6.04049	0	0.879002	0
Cep250	-4.55409	0.0632512	4.9336	0	0.878543	0
Cdkn1b	-0.347882	0.284631	0.885517	0	0.877865	0
Mettl7a3	-0.189754	0.126502	0.632512	0	0.877837	0
Srsf1	-0.632512	0.442759	1.86591	0	0.877642	0
Ado	-0.316256	0.253005	0.759015	0	0.877396	0
Zyg11b	-0.316256	0.189754	4.74384	0	0.877265	0
1600014C10Rik	-0.0948768	0	6.73626	0	0.875458	0
Med4	-0.379507	-0.0316256	6.76788	0	0.873174	0
Asb13	-1.32828	0.727389	6.42	0	0.872108	0
Wbscr22	-1.20177	1.1069	2.94118	0	0.869343	0
Ralgapa1	-1.61291	0.948768	6.89438	0	0.868947	0
Zfp281	-4.74384	0	6.167	0	0.867886	0
Tmem14a	-1.20177	1.13852	2.68818	0	0.867613	0
Zc3hav1l	-1.73941	0.442759	1.73941	0	0.866775	0
Zfand6	-0.632512	0.442759	1.39153	0	0.866152	0
Tfap2b	-0.284631	0.189754	0.948768	0	0.86597	0
D230025D16Rik	-4.64897	0	5.21823	0	0.864803	0
Fam81a	-0.347882	0.158128	3.13094	0	0.8646	0
Rapgef1	-4.58571	0	6.07212	0	0.863942	0
2610507I01Rik	-2.21379	3.44719	4.99685	0	0.862031	0
Oraov1	-0.0948768	0	6.167	0	0.860405	0
Atp6v1g2	-4.52246	5.0601	6.26187	0	0.860175	0
Ttc4	-0.948768	0.600887	2.78305	0	0.860162	0
2010001A14Rik	-2.02404	2.4668	5.97724	0	0.859938	0
Fbxl14	-0.189754	0.0632512	4.9336	0	0.859363	0
Dctpp1	-4.36433	0.0632512	4.52246	0	0.858917	0
Ccdc67	-0.284631	0.189754	1.01202	0	0.857301	0
Itgb4	-0.253005	0.158128	0.727389	0	0.853242	0
Crlf3	-1.58128	0.759015	6.2935	0	0.851592	0
Gnai3	-1.17015	0.948768	2.81468	0	0.851046	0
Igfbpl1	-0.189754	0.126502	0.79064	0	0.850818	0
Fem1c	-4.80709	0.221379	6.23025	0	0.847441	0
Zfp383	-0.189754	0.0316256	5.62936	0	0.846912	0
Itgav	-0.379507	0.284631	0.917143	0	0.846688	0
Stmn3	-4.20621	0.0316256	5.37635	0	0.845666	0
Smc1a	-5.24985	0.189754	7.14739	0	0.845587	0
Pced1a	-0.695764	-0.0316256	6.23025	0	0.845519	0
Cdk8	-4.87034	0	6.07212	0	0.845314	0
Drp2	-1.86591	0.853892	6.13537	0	0.84448	0
Adtrp	-0.379507	0.221379	1.77103	0	0.843894	0
Dock6	-0.537635	0.0632512	5.88236	0	0.843492	0
Mrpl32	-0.79064	0.50601	1.96079	0	0.841379	0
Ccng1	-0.537635	-0.0316256	6.26187	0	0.840823	0
Wdr47	-1.3599	0.79064	6.167	0	0.839183	0
Pcid2	-1.45478	5.62936	6.57813	0	0.839081	0
Ltbp1	-0.79064	0.600887	1.70778	0	0.838902	0
Psmd12	-0.885517	0.537635	2.49842	0	0.83862	0
Lilra6	-0.189754	0.0948768	0.537635	0	0.837621	0
Ercc5	-4.23783	4.45921	6.04049	0	0.837118	0
Sash1	-0.632512	0.474384	1.42315	0	0.836362	0
Ubald2	-3.73182	0	5.02847	0	0.835524	0
Fbn2	-0.221379	0.0948768	0.600887	0	0.835368	0
Psma3	-0.411133	0.316256	1.04365	0	0.834363	0
Cdh11	-0.727389	0.537635	1.58128	0	0.833004	0
Agbl5	-0.189754	0.0948768	0.537635	0	0.831849	0
Lenep	-4.45921	0.189754	5.88236	0	0.831399	0
Lrch4	-4.49084	0	5.62936	0	0.831246	0
2020-09-04	-0.664138	0.442759	1.54966	0	0.831137	0
Etfb	-0.379507	0.284631	1.01202	0	0.831024	0
Sde2	-1.45478	0.50601	6.83113	0	0.829877	0
Dmpk	-1.61291	0.411133	6.32512	0	0.829378	0
Setbp1	-0.695764	0	6.00887	0	0.829256	0
Atg10	-0.379507	0.0948768	5.78749	0	0.828852	0
Arpc3	-5.0601	0	5.53448	0	0.828502	0
Znrf3	-0.347882	0.253005	0.822266	0	0.828045	0
Dera	-5.43961	0.0632512	6.5465	0	0.826329	0
Alg2	-0.759015	0.442759	2.05567	0	0.824412	0
Ndufaf6	-0.126502	0	5.81911	0	0.823381	0
Rhbdl2	-0.853892	0.537635	3.00443	0	0.820656	0
Spcs3	-1.3599	0.917143	6.23025	0	0.820574	0
Tas1r3	-0.189754	0.0632512	1.07527	0	0.820406	0
Stil	-0.221379	0.158128	0.885517	0	0.820197	0
9930104L06Rik	-0.411133	0.126502	4.42759	0	0.819861	0
Tomm70a	-5.40798	0.0948768	1.1069	0	0.819727	0
Kdm3a	-4.04808	0	6.64138	0	0.819484	0
Hspbap1	-0.126502	0	4.87034	0	0.818971	0
Supt3	-0.221379	0	6.10374	0	0.818931	0
Smpd1	-0.474384	0.347882	1.20177	0	0.817935	0
1600020E01Rik	-4.80709	0	6.5465	0	0.817331	0
Ccdc39	-3.54207	0	1.3599	0	0.816905	0
Tmem238	-2.21379	4.23783	6.57813	0	0.816691	0
Ranbp10	-4.64897	0.474384	5.85074	0	0.815872	0
Tspan7	-0.253005	0	0.600887	0	0.815209	0
Apbb3	-0.632512	0.158128	5.75586	0	0.814537	0
Ndc1	-4.0797	0.442759	6.48325	0	0.812441	0
Enthd2	-0.126502	0	5.88236	0	0.81164	0
Ap3s2	-2.15054	5.37635	6.167	0	0.811574	0
Otud4	-1.80266	0.822266	6.51488	0	0.810479	0
Rab3d	-1.77103	0.347882	3.28906	0	0.810441	0
Ahsa2	-1.32828	0.917143	2.68818	0	0.809407	0
Psme2b	-1.86591	0.0632512	3.16256	0	0.809282	0
A230050P20Rik	-1.01202	0.0632512	5.21823	0	0.807113	0
Polr1c	-0.189754	0.0316256	6.167	0	0.80694	0
Pofut1	-3.63695	0.158128	5.50286	0	0.806745	0
Leo1	-1.39153	5.40798	6.48325	0	0.806617	0
Ubr7	-1.39153	0.980394	3.06768	0	0.806569	0
Rpl9	-0.537635	0.347882	1.3599	0	0.80639	0
Ccnd2	-0.411133	0.284631	1.04365	0	0.806175	0
Rnf157	-4.55409	0.0316256	4.83872	0	0.806067	0
Gm14436	-0.600887	0.221379	3.09931	0	0.805844	0
Spg11	-4.42759	0	4.33271	0	0.80557	0
Ppp3r1	-1.54966	0.79064	6.45163	0	0.805379	0
Rngtt	-2.40355	5.24985	6.48325	0	0.804049	0
Top3b	-4.42759	0	6.70463	0	0.803983	0
4831440E17Rik	-1.61291	4.17458	5.0601	0	0.803372	0
Stk39	-5.02847	0.0316256	5.53448	0	0.802984	0
Tcf4	-0.442759	0.316256	0.948768	0	0.802305	0
Fastkd2	-4.55409	5.34473	6.35675	0	0.801552	0
Slc7a6os	-0.600887	-0.0316256	6.35675	0	0.801427	0
Zfp619	-0.316256	0	5.1866	0	0.800781	0
Ehd3	-1.17015	-0.126502	6.79951	0	0.800713	0
Acss1	-0.600887	0.411133	1.45478	0	0.800532	0
Lgalsl	-1.29665	0.822266	2.68818	0	0.800133	0
Zfp141	-3.13094	2.5933	4.42759	0	0.799756	0
Ddx5	-0.316256	0.221379	0.759015	0	0.799208	0
Naaa	-0.569261	0.379507	1.29665	0	0.799197	0
Tppp3	-3.25744	-0.0316256	7.02089	0	0.796423	0
Socs7	-3.22581	0	5.3131	0	0.795285	0
Nrn1	-4.23783	0.0316256	5.56611	0	0.795272	0
Ddt	-0.411133	0.253005	0.948768	0	0.794657	0
Pitrm1	-1.42315	0.632512	7.11576	0	0.79442	0
Gpr174	-0.442759	0.189754	1.45478	0	0.794269	0
Lrp6	-2.7198	4.36433	6.35675	0	0.793827	0
Qpctl	-5.59773	0.0948768	4.49084	0	0.793056	0
6030419C18Rik	-5.09172	0.0632512	0.632512	0	0.791886	0
Fzd7	-0.347882	0.158128	3.13094	0	0.790246	0
Ak4	-0.948768	0.537635	2.78305	0	0.790044	0
Zmym6	-1.54966	0.537635	6.42	0	0.789759	0
Polr2c	-1.01202	0.50601	2.18217	0	0.789542	0
Cables1	-1.64453	0.664138	6.83113	0	0.789192	0
Rom1	-4.52246	0.0316256	4.49084	0	0.789004	0
Hist2h2be	-4.01645	-0.0316256	5.94562	0	0.78841	0
Itgb5	-1.39153	0.948768	3.00443	0	0.787987	0
Pdcd10	-0.79064	0.442759	1.83429	0	0.786416	0
Ddit3	-1.26502	0.695764	2.5933	0	0.78545	0
Gstt3	-1.64453	0.474384	6.83113	0	0.784943	0
Lcat	-0.316256	0.221379	0.727389	0	0.784113	0
Tfb1m	-0.284631	0	5.81911	0	0.783692	0
Cnot8	-0.822266	0.379507	2.3403	0	0.783332	0
Smad4	-5.3131	0.126502	4.17458	0	0.782209	0
Ankle1	-0.347882	0.189754	1.29665	0	0.782101	0
Nacc2	-0.347882	0.253005	0.79064	0	0.781141	0
L1cam	-0.316256	0.158128	1.13852	0	0.779658	0
Enpp6	-0.253005	0.0948768	1.39153	0	0.777934	0
Hmmr	-0.885517	0.50601	4.58571	0	0.777172	0
Trim65	-3.35232	0.126502	3.63695	0	0.77709	0
Qars	-1.51803	1.07527	2.7198	0	0.776797	0
Nt5c2	-0.948768	0.537635	2.08729	0	0.776434	0
Ssna1	-0.980394	0.442759	2.40355	0	0.776341	0
Prpf31	-4.20621	5.0601	6.19862	0	0.77618	0
Dpm1	-0.885517	0.474384	1.80266	0	0.775971	0
Rorb	-0.347882	0.221379	0.822266	0	0.775388	0
Ugt1a6b	-2.43517	1.4864	3.98483	0	0.775332	0
Mir1839	-0.632512	0	2.90956	0	0.775248	0
Arhgap10	-4.11133	0.0316256	5.0601	0	0.774395	0
Dicer1	-3.54207	0	6.38837	0	0.774158	0
Neurl4	-4.04808	0	5.0601	0	0.773852	0
Micu2	-4.23783	0	5.43961	0	0.773685	0
Cep57	-3.44719	1.73941	3.79507	0	0.77344	0
Sall1	-1.45478	0.474384	6.673	0	0.772488	0
Pgs1	-5.69261	0.0632512	6.73626	0	0.771216	0
Phf3	-4.39596	0	6.04049	0	0.770975	0
Vapa	-0.411133	0.253005	0.885517	0	0.77071	0
Kirrel3	-1.17015	0.79064	2.5933	0	0.768785	0
Bcas2	-0.537635	0.347882	1.13852	0	0.768357	0
Ywhaq	-0.442759	0.284631	1.04365	0	0.76825	0
Vti1a	-1.51803	0.411133	6.73626	0	0.76794	0
Lin52	-1.29665	0.79064	2.97281	0	0.767393	0
Zfp709	-0.569261	0.0632512	5.69261	0	0.766186	0
Amigo2	-1.32828	0.917143	2.81468	0	0.765681	0
Isca2	-0.50601	0.316256	1.04365	0	0.76522	0
Dcdc2a	-0.379507	0.221379	0.917143	0	0.765153	0
Tmed2	-0.411133	0.284631	0.948768	0	0.764755	0
Dlgap5	-1.51803	0.253005	2.4668	0	0.764508	0
Fubp1	-1.58128	0.759015	3.51044	0	0.764405	0
Trim33	-3.35232	0.189754	5.75586	0	0.762106	0
Ppp1r2-ps3	-0.411133	0.126502	0.822266	0	0.761998	0
L3hypdh	-4.01645	0	5.94562	0	0.761994	0
Cd38	-1.61291	0.442759	1.99241	0	0.761331	0
Smarce1	-1.70778	0.695764	6.86276	0	0.760807	0
Zfp607	-3.8267	4.36433	4.9336	0	0.760665	0
Rps4x	-0.917143	0.474384	1.86591	0	0.760414	0
Mkks	-1.26502	0.632512	2.68818	0	0.759818	0
Lrp8	-1.42315	0.853892	3.06768	0	0.759482	0
Mterf3	-2.05567	5.3131	6.38837	0	0.756987	0
Ddo	-4.9336	0.189754	6.167	0	0.756965	0
Runx1t1	-4.11133	0.0632512	4.90197	0	0.756898	0
9530068E07Rik	-1.42315	0.917143	2.78305	0	0.756619	0
Oip5	-0.822266	0.126502	3.54207	0	0.756448	0
Asxl1	-5.40798	0.0316256	4.87034	0	0.756227	0
Trim28	-1.3599	0.442759	7.14739	0	0.755433	0
Hdgfl1	-0.411133	0.158128	1.26502	0	0.754828	0
Ddhd1	-0.442759	0.284631	0.948768	0	0.75478	0
Trim52	-0.379507	0.0316256	2.27704	0	0.754385	0
Rnase1	-5.24985	0.0316256	5.97724	0	0.754067	0
Sftpd	-0.253005	0.126502	0.695764	0	0.754022	0
Gm14420	-0.600887	0.316256	4.36433	0	0.753886	0
Whsc1l1	-0.347882	0.221379	4.42759	0	0.753824	0
Ufd1l	-0.759015	0.442759	1.51803	0	0.753389	0
Gmppb	-0.221379	0	3.00443	0	0.752949	0
Plekhb1	-0.727389	0.411133	1.3599	0	0.752885	0
Ptprd	-3.41557	0.253005	0.885517	0	0.752765	0
Cdadc1	-5.15498	0	7.05251	0	0.752764	0
Ppp2r5b	-1.51803	1.26502	2.68818	0	0.752067	0
Rpl7l1	-0.632512	0.347882	1.29665	0	0.752041	0
Cyp4f14	-0.79064	0.442759	1.80266	0	0.751451	0
Zfp263	-1.45478	0.822266	6.73626	0	0.750602	0
Diap1	-4.52246	0.0316256	4.90197	0	0.75053	0
Zfp955a	-4.99685	0.0632512	6.07212	0	0.750294	0
Aagab	-5.43961	0.0632512	6.23025	0	0.75009	0
Atg13	-1.13852	0.50601	4.39596	0	0.749473	0
Txndc9	-0.537635	0.316256	1.2334	0	0.748737	0
Arpin	-1.3599	0.474384	7.40039	0	0.747734	0
Nfib	-0.537635	0.347882	1.1069	0	0.747406	0
Gab1	-0.347882	0.0316256	5.97724	0	0.747387	0
Tlcd1	-0.379507	0.221379	0.853892	0	0.746365	0
Mina	-4.14296	0	5.37635	0	0.744916	0
Ppm1b	-1.77103	1.3599	3.13094	0	0.744677	0
Tnpo3	-1.51803	0.284631	4.52246	0	0.744402	0
Fyttd1	-1.29665	0.695764	2.75143	0	0.743753	0
l7Rn6	-0.600887	0.347882	1.4864	0	0.742275	0
Mtf2	-2.21379	0.474384	6.07212	0	0.740824	0
Cecr2	-1.73941	0.759015	6.26187	0	0.740382	0
Tmbim7	-0.284631	0.126502	1.17015	0	0.740316	0
Mier3	-1.99241	5.15498	6.57813	0	0.739724	0
Irs2	-4.77547	0.0316256	5.02847	0	0.73947	0
C920006O11Rik	-5.0601	0.221379	5.75586	0	0.739254	0
AW209491	-5.43961	0.0316256	6.26187	0	0.738984	0
Ptgr2	-0.759015	0.347882	2.05567	0	0.738868	0
Gba	-1.17015	0.632512	2.37192	0	0.737075	0
Pygm	-0.474384	0.284631	1.04365	0	0.736755	0
Trim23	-4.45921	0.50601	6.38837	0	0.735738	0
Efr3b	-1.07527	0.474384	1.99241	0	0.735376	0
Clk4	-0.600887	0.316256	1.67616	0	0.734446	0
Ebp	-1.45478	0.442759	7.08414	0	0.734209	0
Hmg20b	-1.29665	0.600887	2.78305	0	0.733692	0
Ifit3b	-5.62936	0.189754	6.64138	0	0.733659	0
1810026J23Rik	-1.2334	0.632512	2.4668	0	0.73263	0
Camkk2	-0.853892	0.189754	1.39153	0	0.731807	0
Trafd1	-4.33271	0.0632512	5.62936	0	0.731805	0
Psma2	-0.50601	0.284631	1.13852	0	0.731532	0
Zfp217	-3.32069	0	5.43961	0	0.731264	0
Dlg5	-1.45478	0.885517	2.87793	0	0.731061	0
Atp6v0a2	-1.26502	0.79064	3.06768	0	0.730618	0
Srrd	-0.158128	0	5.24985	0	0.730027	0
Crnkl1	-3.54207	0	5.12335	0	0.729836	0
Map7d2	-3.76345	0.0632512	0.600887	0	0.729609	0
Dusp22	-0.948768	0.474384	3.13094	0	0.728766	0
Lgals8	-1.42315	0.632512	6.95764	0	0.728211	0
Nup85	-4.17458	0	5.53448	0	0.727668	0
Nme1	-0.537635	0.284631	1.2334	0	0.727455	0
Ccdc132	-1.70778	0.853892	3.51044	0	0.727231	0
Dcaf6	-0.347882	0.221379	0.695764	0	0.727013	0
Csde1	-0.885517	0.474384	1.70778	0	0.726764	0
Nras	-0.379507	0.221379	0.79064	0	0.726334	0
Ilf3	-1.29665	0.600887	2.7198	0	0.72627	0
Rdh10	-5.37635	0.0316256	6.04049	0	0.726049	0
Rxra	-0.0948768	0	5.78749	0	0.725917	0
Gprc5c	-1.26502	0.695764	1.86591	0	0.725836	0
Dpysl4	-0.0948768	0	6.35675	0	0.724767	0
Zdhhc4	-1.51803	0.980394	2.97281	0	0.724365	0
Qser1	-1.04365	0	5.3131	0	0.723903	0
Dhrs11	-1.77103	0.917143	6.13537	0	0.723376	0
Tmem183a	-1.61291	5.40798	7.08414	0	0.722735	0
Cry2	-0.664138	0.411133	1.42315	0	0.722651	0
Cnot1	-1.70778	1.1069	4.0797	0	0.72263	0
P4ha2	-0.126502	0	5.88236	0	0.721868	0
Enah	-0.664138	0.379507	1.32828	0	0.72137	0
Mrpl36	-0.948768	0.50601	1.83429	0	0.721284	0
Stc1	-0.221379	0.0948768	0.569261	0	0.720984	0
Gm12253	-0.442759	0.158128	2.05567	0	0.720817	0
Rab11b	-0.600887	0.347882	1.26502	0	0.720571	0
Colq	-0.980394	0.600887	1.80266	0	0.720498	0
Tsix	-0.221379	0.0948768	0.537635	0	0.720377	0
Rad17	-4.20621	0	4.96522	0	0.720176	0
Fam208b	-4.23783	0	5.75586	0	0.720069	0
Ecm2	-1.01202	0.537635	2.56167	0	0.719201	0
Ndufs3	-0.442759	0.253005	1.01202	0	0.719154	0
Zfp712	-4.55409	0	5.12335	0	0.718734	0
Ptk2	-1.26502	0.664138	2.53005	0	0.718727	0
Snx32	-1.13852	0.411133	2.3403	0	0.718461	0
Cebpb	-0.253005	0.126502	0.632512	0	0.718109	0
Abhd3	-0.379507	0.221379	0.759015	0	0.7163	0
Nap1l4	-1.32828	0.759015	2.3403	0	0.715127	0
Grin3a	-0.284631	0.126502	0.727389	0	0.714711	0
Asap1	-1.4864	0.822266	3.00443	0	0.714452	0
Rpl34	-1.01202	0.284631	3.92158	0	0.714452	0
8430429K09Rik	-2.37192	0.474384	4.71222	0	0.71416	0
Nck2	-0.221379	0.0316256	5.91399	0	0.712967	0
C5ar2	-0.600887	0.316256	1.26502	0	0.711176	0
Parva	-5.40798	0.126502	6.5465	0	0.709677	0
Nipa1	-0.221379	-0.0316256	6.35675	0	0.708948	0
Sec61a2	-1.2334	0.600887	2.24542	0	0.708627	0
Apol7b	-1.4864	0.0948768	3.98483	0	0.70829	0
Apol7e	-1.4864	0.0948768	3.98483	0	0.70829	0
Grpel1	-1.17015	0.569261	2.24542	0	0.707634	0
1110034G24Rik	-5.1866	0	6.673	0	0.707485	0
Ublcp1	-1.4864	0.442759	7.05251	0	0.707324	0
Arntl	-5.66099	0	7.14739	0	0.707197	0
Ccdc84	-4.64897	0	6.38837	0	0.706826	0
Pdhx	-1.39153	0.822266	2.84631	0	0.70609	0
Parp16	-5.37635	0.0948768	6.00887	0	0.705593	0
Tmem9	-0.917143	0.442759	1.54966	0	0.705504	0
Apbb2	-4.04808	0.0632512	4.99685	0	0.705315	0
C030006K11Rik	-3.73182	0.0316256	5.69261	0	0.703199	0
Pde6d	-1.80266	0.885517	7.08414	0	0.702159	0
Rpp14	-1.51803	0.411133	7.05251	0	0.701768	0
Tmem181c-ps	-2.11892	0.600887	4.26946	0	0.701432	0
Snhg1	-4.49084	0	3.60532	0	0.701346	0
Dhdds	-1.54966	0.411133	7.43202	0	0.700884	0
Flrt2	-0.189754	0.0632512	0.569261	0	0.700802	0
2310022A10Rik	-0.474384	0.0632512	5.94562	0	0.700469	0
Gfap	-5.34473	0.126502	6.19862	0	0.700187	0
Tubgcp2	-5.3131	-0.0316256	6.76788	0	0.699971	0
Lemd3	-3.9532	0	3.41557	0	0.699056	0
Scn2b	-0.569261	0.316256	1.2334	0	0.698767	0
Cmc2	-4.74384	0	5.85074	0	0.698709	0
Spsb3	-0.948768	0.158128	2.56167	0	0.697995	0
Szt2	-0.759015	0.0632512	4.11133	0	0.696959	0
Tlr3	-0.600887	0.316256	1.17015	0	0.696916	0
Wars2	-3.9532	0	5.53448	0	0.69633	0
Orc2	-0.347882	0.0948768	2.5933	0	0.695915	0
Ube2g1	-1.1069	0.474384	2.05567	0	0.695514	0
Gsta4	-1.2334	0.569261	2.24542	0	0.695159	0
Tnfsf12	-1.83429	0.948768	2.78305	0	0.694172	0
Cggbp1	-2.3403	6.23025	7.05251	0	0.694029	0
Dhx36	-2.11892	0.600887	6.38837	0	0.69386	0
Prr14	-1.61291	0.948768	2.68818	0	0.693224	0
Iws1	-3.03606	1.29665	3.7002	0	0.692869	0
Tceal1	-1.45478	0.221379	6.98926	0	0.692548	0
Mysm1	-0.980394	0.158128	4.61734	0	0.692452	0
Gm16386	-0.221379	0.0316256	3.92158	0	0.691344	0
Fastkd1	-5.24985	0.189754	5.88236	0	0.691192	0
Gm10033	-0.221379	0.0632512	4.39596	0	0.691144	0
Fat1	-5.12335	0.0316256	6.45163	0	0.690976	0
Golga3	-3.57369	0.0316256	0.569261	0	0.690722	0
Trnau1ap	-5.15498	-0.0948768	6.42	0	0.690574	0
A330048O09Rik	-1.96079	0.221379	6.60975	0	0.689722	0
Intu	-3.8267	0.0948768	4.90197	0	0.689574	0
Evc2	-5.3131	0	4.9336	0	0.689574	0
Prcp	-0.316256	0.158128	0.980394	0	0.689147	0
Gstm7	-5.53448	0	6.98926	0	0.688833	0
Orc3	-4.68059	0.0632512	6.00887	0	0.688658	0
Rbms2	-1.92916	0.727389	5.66099	0	0.688639	0
Tef	-1.20177	0.50601	2.68818	0	0.688168	0
Arf3	-3.25744	0.284631	5.66099	0	0.68803	0
Jmjd6	-5.43961	0.0316256	5.62936	0	0.687832	0
Slc30a7	-1.4864	0.50601	6.89438	0	0.687723	0
Irgm1	-1.1069	0.189754	4.80709	0	0.687027	0
Ttf1	-2.37192	0.0632512	4.96522	0	0.687027	0
E130307A14Rik	-4.58571	0	5.78749	0	0.686939	0
Stk38	-5.43961	0.0632512	6.64138	0	0.686874	0
Ahcyl2	-1.67616	0.632512	6.04049	0	0.686047	0
Slc7a11	-0.727389	0.379507	1.4864	0	0.686018	0
Fgfbp3	-1.54966	0.885517	3.85833	0	0.685457	0
Atp13a4	-0.632512	0.316256	1.13852	0	0.685168	0
1190007I07Rik	-2.62493	0.917143	4.20621	0	0.684701	0
Cdk12	-2.02404	-0.0316256	5.85074	0	0.684599	0
Tbc1d8b	-1.01202	0.253005	1.64453	0	0.684512	0
Umps	-0.189754	0	7.14739	0	0.684421	0
Dusp19	-1.73941	-0.0632512	6.167	0	0.684034	0
Senp7	-2.78305	3.41557	4.61734	0	0.683938	0
Ppp1r26	-4.23783	0.0632512	4.71222	0	0.683052	0
Trmt12	-4.68059	0	5.0601	0	0.682533	0
Mccc1	-5.69261	0.0632512	6.98926	0	0.681913	0
Mbp	-4.55409	0	6.32512	0	0.681882	0
Cisd2	-1.73941	0.917143	3.06768	0	0.681667	0
Psg28	-0.411133	0.126502	1.73941	0	0.681535	0
Padi2	-0.600887	0.284631	3.16256	0	0.681437	0
Cnpy2	-1.13852	0.442759	2.43517	0	0.681292	0
Cldnd1	-0.79064	0.347882	1.61291	0	0.681232	0
Gm12657	-0.50601	0.189754	1.13852	0	0.681145	0
Arhgef10	-0.632512	0	6.26187	0	0.681017	0
Snap25	-1.04365	-0.189754	5.59773	0	0.680671	0
Serbp1	-0.411133	0.221379	1.17015	0	0.679885	0
Tnfaip1	-1.4864	0.695764	2.62493	0	0.679749	0
Gpx8	-4.30108	0	6.167	0	0.679737	0
Sars	-0.695764	0.347882	1.4864	0	0.679726	0
Eprs	-1.29665	0.569261	2.7198	0	0.67961	0
Tspan12	-0.695764	0.347882	1.26502	0	0.67942	0
Gdf1	-0.537635	0.284631	1.07527	0	0.678716	0
Ipo8	-1.64453	1.07527	2.90956	0	0.678524	0
Snrpg	-1.99241	1.01202	2.90956	0	0.678418	0
Slc39a9	-2.65655	5.12335	6.673	0	0.678309	0
Rhoq	-1.54966	0.50601	3.09931	0	0.67783	0
Id4	-0.537635	0.284631	1.17015	0	0.677751	0
Tmem38a	-1.45478	0.727389	2.68818	0	0.677026	0
Fam89b	-1.61291	0.980394	2.75143	0	0.676983	0
5430437J10Rik	-0.221379	0.0632512	0.569261	0	0.676901	0
Zfp943	-0.221379	0	6.04049	0	0.676532	0
Nr1h5	-0.379507	0.158128	0.822266	0	0.676358	0
Sik1	-0.379507	0.189754	0.727389	0	0.676065	0
Snora81	-0.347882	0.0948768	1.77103	0	0.67577	0
Mut	-1.92916	0.980394	2.94118	0	0.675764	0
Gpc3	-0.695764	0.379507	1.54966	0	0.675243	0
3110043O21Rik	-5.21823	0	5.15498	0	0.674207	0
Il1f9	-3.44719	0.253005	3.03606	0	0.672792	0
Copb2	-1.58128	0.759015	4.9336	0	0.672661	0
Fam160a2	-4.45921	0	6.51488	0	0.672101	0
Sh3yl1	-4.23783	0.0316256	4.96522	0	0.6721	0
Ldhd	-4.49084	0.126502	5.62936	0	0.671963	0
4930570G19Rik	-4.23783	-0.0948768	6.57813	0	0.67147	0
Cml5	-0.79064	0.316256	2.21379	0	0.670578	0
Gm1943	-1.13852	0	6.04049	0	0.67039	0
B9d2	-5.43961	0	7.05251	0	0.66975	0
Celf1	-1.29665	0.664138	2.40355	0	0.669347	0
Slfn8	-0.474384	0	2.75143	0	0.66933	0
2020-09-05	-1.61291	0.347882	3.03606	0	0.669099	0
Kpnb1	-1.96079	0.664138	6.23025	0	0.668975	0
Tapbp	-0.759015	0.379507	1.51803	0	0.668868	0
Chst11	-4.77547	0	6.42	0	0.66819	0
Armc5	-0.759015	0	6.04049	0	0.667041	0
Platr17	-4.01645	0.0632512	4.9336	0	0.666772	0
Ndufs1	-0.79064	0.347882	1.51803	0	0.666712	0
Prkag1	-1.32828	0.569261	1.89754	0	0.666707	0
Tbx3os2	-0.284631	0.126502	0.79064	0	0.665504	0
Flrt1	-3.00443	0.0948768	5.97724	0	0.665101	0
Ythdf2	-0.411133	0.221379	0.822266	0	0.664955	0
Kdm5a	-1.83429	1.2334	3.19419	0	0.66495	0
Eny2	-0.948768	0.411133	2.56167	0	0.664677	0
Zfp825	-2.56167	0.411133	4.11133	0	0.663424	0
Asph	-1.07527	0.474384	2.15054	0	0.663151	0
Trib2	-0.50601	0.253005	0.948768	0	0.663118	0
Gapdhs	-3.85833	0.158128	1.99241	0	0.662876	0
Dhx35	-5.34473	0.0632512	5.78749	0	0.66175	0
Hiatl1	-1.13852	0.411133	2.40355	0	0.66118	0
Tmcc1	-5.59773	0.0948768	7.02089	0	0.661072	0
4932438H23Rik	-0.126502	0	5.56611	0	0.660883	0
Zfp46	-3.47882	0.158128	3.41557	0	0.660723	0
Epc2	-4.20621	0	4.61734	0	0.660078	0
Cdan1	-3.47882	0.411133	5.3131	0	0.659998	0
Ube2m	-4.49084	0.379507	6.04049	0	0.659701	0
Dctd	-1.39153	0.727389	2.75143	0	0.659594	0
Ndufaf2	-1.83429	0.50601	2.97281	0	0.65929	0
Chrna5	-1.61291	0	2.97281	0	0.658726	0
Amy1	-1.96079	0.79064	6.73626	0	0.657706	0
Raver1	-1.77103	0.253005	6.60975	0	0.65679	0
Ccdc146	-4.30108	0	1.45478	0	0.656107	0
Cdc14b	-1.1069	0.474384	3.66857	0	0.655623	0
Zfp758	-3.85833	0	4.99685	0	0.655401	0
Tmem245	-3.09931	2.05567	3.76345	0	0.654464	0
Nqo2	-4.01645	0.284631	5.81911	0	0.653988	0
Camsap2	-3.8267	0	5.28148	0	0.653932	0
Gprasp1	-1.70778	0.600887	5.91399	0	0.653575	0
H2afv	-0.727389	0.347882	1.42315	0	0.653503	0
Plekha8	-0.253005	0.0632512	0.853892	0	0.653381	0
Trim32	-4.58571	0.0316256	4.71222	0	0.653319	0
Samm50	-1.61291	0.980394	2.68818	0	0.653067	0
Ngef	-0.50601	0.253005	1.04365	0	0.652921	0
Rpl4	-0.50601	0.253005	1.04365	0	0.651981	0
Acox1	-0.664138	0.316256	1.20177	0	0.651851	0
4833417C18Rik	-0.474384	0.126502	3.8267	0	0.651094	0
Cdkal1	-0.411133	0.189754	4.17458	0	0.650822	0
Mphosph8	-5.50286	0.126502	6.60975	0	0.650122	0
Zmat5	-1.29665	0.50601	2.4668	0	0.648455	0
Sos1	-4.36433	-0.0948768	6.2935	0	0.648367	0
Micall2	-4.99685	0.0316256	5.28148	0	0.648234	0
Orai1	-1.1069	1.20177	2.37192	0	0.647954	0
Vangl2	-5.37635	0.158128	5.21823	0	0.647404	0
Siah1a	-0.316256	0	6.2935	0	0.647271	0
Atg4c	-3.13094	0.189754	1.20177	0	0.646082	0
Apobec3	-5.43961	0.0316256	5.43961	0	0.645858	0
Bsn	-0.347882	0.0632512	5.81911	0	0.64573	0
Tardbp	-0.948768	0.347882	2.30867	0	0.645201	0
Anapc2	-1.77103	0.600887	7.43202	0	0.644494	0
Fzd2	-0.695764	0.347882	1.42315	0	0.643839	0
Plekha1	-4.17458	0.0316256	6.2935	0	0.643295	0
D330045A20Rik	-0.221379	0.0632512	0.50601	0	0.643267	0
Atp5l	-0.379507	0.189754	0.727389	0	0.642685	0
Rasl11b	-4.9336	0	6.23025	0	0.642524	0
Cyp4f15	-0.600887	0.253005	1.4864	0	0.641554	0
Txlnb	-0.537635	0.126502	4.04808	0	0.641552	0
Rab3ip	-0.379507	0	6.19862	0	0.641068	0
Sorcs2	-1.3599	0.474384	2.65655	0	0.640517	0
Rnaseh2b	-3.98483	0	4.49084	0	0.640246	0
Prickle2	-3.54207	1.61291	2.68818	0	0.640132	0
Rbck1	-1.58128	0.822266	2.37192	0	0.640012	0
Pgd	-5.21823	0.189754	6.07212	0	0.63982	0
Lzts3	-0.759015	0.0948768	2.15054	0	0.639172	0
Aldoart1	-0.316256	0.126502	0.917143	0	0.638935	0
Dennd5b	-0.347882	0.189754	0.727389	0	0.638746	0
Adrb2	-0.316256	0.0948768	1.13852	0	0.638374	0
Hrsp12	-0.411133	0.221379	0.822266	0	0.637947	0
Bod1	-5.21823	0.158128	5.75586	0	0.637623	0
Lars2	-0.411133	0.189754	0.79064	0	0.637582	0
Ppp1r8	-5.24985	0.189754	6.07212	0	0.637429	0
Pcbd2	-2.11892	0.664138	3.57369	0	0.637228	0
BC037032	-0.221379	0.0632512	0.695764	0	0.636835	0
Slc39a12	-0.347882	0.189754	0.664138	0	0.636804	0
Accs	-5.56611	0.126502	0.79064	0	0.636062	0
Apoo-ps	-3.19419	0.411133	4.36433	0	0.635241	0
Proca1	-2.02404	4.33271	6.38837	0	0.634646	0
Akr1e1	-1.42315	0.695764	2.84631	0	0.634245	0
Sgms1	-5.37635	0	6.5465	0	0.633851	0
Ric3	-4.04808	0.0316256	4.20621	0	0.633766	0
Eif2s1	-1.32828	0.537635	2.4668	0	0.63376	0
Med1	-1.89754	0.727389	3.7002	0	0.633708	0
Mfrp	-2.81468	1.89754	4.80709	0	0.633582	0
Tdrd3	-3.92158	0.759015	5.28148	0	0.633482	0
Fam21	-0.664138	0.316256	1.2334	0	0.631811	0
Fggy	-5.3131	0.0316256	6.51488	0	0.631337	0
Soat1	-0.442759	0.221379	0.853892	0	0.631206	0
BC029214	-0.727389	0.316256	1.13852	0	0.631083	0
Ankmy2	-3.38394	-0.221379	6.26187	0	0.631001	0
Gmeb2	-0.126502	0	5.0601	0	0.630123	0
B3gnt4	-0.442759	0.0316256	0.79064	0	0.629374	0
Dis3l	-3.00443	0.695764	6.07212	0	0.629226	0
Eif4ebp1	-5.09172	0	6.48325	0	0.629002	0
Dnaaf1	-4.33271	0	3.32069	0	0.628906	0
Abcb8	-1.54966	0.79064	2.68818	0	0.628376	0
Pdxk	-4.20621	0.442759	5.66099	0	0.628106	0
Camkk1	-0.221379	0	4.42759	0	0.627844	0
Fgfr1	-0.695764	0.316256	1.26502	0	0.62754	0
Eef2kmt	-1.45478	0.379507	4.14296	0	0.62622	0
Medag	-0.980394	0.126502	2.5933	0	0.626101	0
Vps37c	-5.15498	0.0316256	6.13537	0	0.625153	0
Wbscr16	-1.92916	0.189754	6.60975	0	0.624996	0
Dnaja4	-4.83872	0.0632512	4.71222	0	0.62349	0
Ndufb6	-0.411133	0.189754	0.759015	0	0.623184	0
Mcts2	-5.1866	0.0316256	5.81911	0	0.622591	0
Ddx52	-5.37635	0.126502	6.23025	0	0.622582	0
Rfc5	-5.09172	0.0316256	5.50286	0	0.622568	0
Zswim6	-4.74384	0	1.39153	0	0.622385	0
Phf23	-5.15498	0	6.26187	0	0.621715	0
Psmd5	-1.1069	0.221379	2.56167	0	0.621389	0
H2-Q10	-0.347882	0.126502	0.948768	0	0.621124	0
Sap30	-1.61291	0.885517	2.81468	0	0.621066	0
Cacna2d2	-4.64897	0	3.03606	0	0.62103	0
Ptrh1	-5.40798	0.0316256	4.49084	0	0.620473	0
Adk	-0.411133	0.189754	0.79064	0	0.620016	0
Tubb4a	-0.221379	0.0316256	5.75586	0	0.619864	0
Rnf145	-1.45478	0.664138	2.65655	0	0.619826	0
Fam3a	-5.50286	0.0316256	5.78749	0	0.619801	0
Dcxr	-1.26502	0.50601	2.49842	0	0.618948	0
Cbx7	-1.39153	0.379507	4.58571	0	0.618156	0
Nxn	-4.77547	0	5.81911	0	0.617939	0
Zc3hc1	-3.9532	0.0316256	5.88236	0	0.616977	0
Ggnbp2	-1.17015	0.569261	1.86591	0	0.616908	0
2210016F16Rik	-4.96522	0.126502	6.57813	0	0.616686	0
Cbfa2t2	-4.0797	0.0948768	4.96522	0	0.616084	0
Tcerg1	-5.34473	0	6.79951	0	0.615789	0
Bdp1	-4.26946	0	3.60532	0	0.615713	0
Fh1	-0.600887	0.284631	1.1069	0	0.614666	0
Ino80d	-4.14296	-0.0632512	6.04049	0	0.614322	0
Ncs1	-0.79064	0.253005	2.75143	0	0.61427	0
Hnrnpll	-5.34473	0.189754	5.94562	0	0.613665	0
Ncoa1	-0.980394	0.411133	1.89754	0	0.61352	0
Gpam	-0.695764	0.316256	1.29665	0	0.612913	0
Klhl20	-0.537635	0	6.07212	0	0.612496	0
Fam134c	-4.64897	0.0316256	5.75586	0	0.611742	0
Slc22a23	-5.3131	0.0632512	6.76788	0	0.611467	0
Slc25a3	-0.379507	0.158128	0.695764	0	0.611258	0
G530011O06Rik	-3.47882	0.569261	5.02847	0	0.610873	0
1700034H15Rik	-0.727389	0.284631	4.45921	0	0.610419	0
Fam160b1	-5.24985	0	5.91399	0	0.610405	0
Adamts13	-4.01645	0.0948768	4.55409	0	0.610314	0
Gm11696	-3.60532	-0.0316256	5.1866	0	0.610221	0
Apeh	-1.39153	0.600887	2.62493	0	0.610163	0
Gm38415	-2.05567	1.86591	4.64897	0	0.610157	0
Ankrd29	-0.79064	0.347882	1.58128	0	0.610051	0
Zcchc4	-2.27704	3.60532	4.77547	0	0.609484	0
Smarcad1	-5.0601	0	5.50286	0	0.60932	0
Bnip3l	-1.01202	0.379507	1.92916	0	0.608998	0
Cndp2	-1.77103	0.569261	7.74828	0	0.608515	0
Synj2bp-cox16	-0.316256	-0.0316256	6.10374	0	0.608111	0
Elp6	-5.1866	0.0316256	5.59773	0	0.607812	0
Srfbp1	-4.68059	0.0316256	4.14296	0	0.607207	0
Ralb	-4.74384	0.284631	6.76788	0	0.606796	0
Glyctk	-4.04808	0	5.53448	0	0.605229	0
Syndig1l	-0.347882	0.158128	0.632512	0	0.605165	0
Usp6nl	-4.74384	0	5.88236	0	0.604952	0
Bzw2	-5.0601	0	5.78749	0	0.604364	0
Unc119b	-4.74384	0.0632512	5.85074	0	0.604254	0
Zdhhc12	-1.58128	0.727389	2.62493	0	0.604034	0
Gm8234	-1.01202	0.411133	2.02404	0	0.60382	0
Atp5f1	-0.411133	0.189754	0.727389	0	0.602832	0
Rnf123	-5.1866	0	6.32512	0	0.602726	0
Acta2	-0.442759	0.126502	1.4864	0	0.602528	0
Gm17750	-1.92916	0.917143	3.60532	0	0.602497	0
Csgalnact2	-5.28148	0	2.87793	0	0.602461	0
Seh1l	-0.822266	0	6.167	0	0.60235	0
Gpbp1l1	-3.19419	0.0316256	4.68059	0	0.602326	0
Tmem246	-1.04365	0.379507	1.73941	0	0.601692	0
Naa20	-0.885517	0.316256	1.99241	0	0.601646	0
Tram1l1	-1.58128	0.379507	7.40039	0	0.601503	0
St6galnac4	-1.64453	0.600887	2.90956	0	0.601392	0
Mgrn1	-1.4864	0.853892	2.53005	0	0.601092	0
Xaf1	-1.86591	-0.0948768	4.71222	0	0.601046	0
Ankrd46	-0.885517	0.347882	1.99241	0	0.600834	0
Clk2	-5.53448	-0.0316256	5.81911	0	0.600582	0
Herc2	-4.99685	0.221379	6.42	0	0.600519	0
Fam13c	-0.664138	0.284631	1.13852	0	0.599412	0
Zfp329	-0.411133	0.189754	0.727389	0	0.599277	0
Ermp1	-3.76345	0.158128	6.13537	0	0.599036	0
D630033O11Rik	-0.126502	0	5.21823	0	0.598913	0
Cnot10	-5.37635	0	6.42	0	0.598756	0
Ppapdc1a	-5.69261	-0.284631	6.95764	0	0.598239	0
Taok2	-4.14296	0.253005	4.83872	0	0.598232	0
Cbx1	-4.77547	0.0632512	5.78749	0	0.59783	0
Lrrn4cl	-0.885517	0.284631	4.39596	0	0.597551	0
Pithd1	-1.1069	0.379507	2.18217	0	0.597446	0
Ppapdc1b	-5.94562	0.0316256	7.17901	0	0.596994	0
Usp24	-1.67616	0.727389	3.28906	0	0.596795	0
Adam17	-4.74384	0.0948768	5.78749	0	0.596654	0
Rps15a-ps4	-1.61291	0.569261	2.4668	0	0.595568	0
Ttc39aos1	-0.316256	0.0948768	1.01202	0	0.595318	0
Extl3	-1.58128	0.632512	3.7002	0	0.595132	0
Nf2	-0.50601	0	5.88236	0	0.595117	0
Pex11b	-1.54966	0.537635	2.5933	0	0.594987	0
Snx22	-1.1069	0.379507	4.55409	0	0.59433	0
Gpn2	-4.90197	0	6.23025	0	0.593428	0
Srsf2	-0.379507	0.189754	0.695764	0	0.592695	0
4930480K23Rik	-0.759015	0.126502	2.62493	0	0.59238	0
Tmx4	-1.92916	1.04365	4.68059	0	0.59214	0
Mast2	-0.537635	0.0632512	5.37635	0	0.591914	0
Stoml2	-1.4864	0.600887	2.62493	0	0.591515	0
Spag9	-0.50601	0.221379	0.948768	0	0.591338	0
Golt1b	-0.632512	0.253005	3.57369	0	0.591182	0
Wash1	-1.96079	0.379507	3.44719	0	0.59023	0
Ar	-0.79064	0.126502	1.73941	0	0.589967	0
Wdr45b	-1.61291	0.284631	6.95764	0	0.58986	0
Pdss1	-5.12335	0.0316256	4.26946	0	0.589763	0
Wnt4	-0.632512	0.253005	4.64897	0	0.58919	0
Mfsd11	-0.569261	0.253005	1.01202	0	0.588653	0
C030037D09Rik	-1.39153	0.537635	2.27704	0	0.588247	0
Dnajc27	-5.28148	0	3.63695	0	0.5879	0
1700100I10Rik	-0.442759	0.126502	1.45478	0	0.587338	0
0610009L18Rik	-4.23783	0	5.02847	0	0.587191	0
Kantr	-1.99241	0.600887	3.19419	0	0.586955	0
Sf3a3	-1.96079	0.442759	6.92601	0	0.586598	0
Pafah1b1	-1.67616	0.50601	2.94118	0	0.5862	0
Gpc1	-4.96522	0.221379	6.42	0	0.586061	0
Gm14405	-0.316256	0.0948768	0.537635	0	0.585925	0
Dtx2	-5.24985	0.0316256	4.96522	0	0.585634	0
Arid5b	-0.600887	0.126502	3.47882	0	0.585311	0
AA414768	-0.316256	0.158128	1.01202	0	0.585281	0
Nhsl2	-0.442759	0.126502	1.42315	0	0.585216	0
Prune	-5.47123	0.0632512	0.569261	0	0.585078	0
Ndufb4	-0.379507	0.189754	0.695764	0	0.58499	0
Rnf185	-4.74384	0.221379	6.2935	0	0.584958	0
Hyal3	-0.885517	0.347882	1.77103	0	0.584839	0
Rad51c	-2.62493	1.29665	2.30867	0	0.584794	0
Slc38a6	-2.24542	0.948768	4.39596	0	0.584455	0
Olr1	-0.316256	-0.0316256	2.05567	0	0.583798	0
Jmjd7	-0.126502	0	5.94562	0	0.583511	0
Cpped1	-1.73941	0.379507	6.83113	0	0.583249	0
Eif4a1	-0.50601	0.221379	1.01202	0	0.582313	0
Map3k1	-0.0316256	0	0.79064	0	0.582271	0
Dctn5	-0.980394	0.316256	2.15054	0	0.582166	0
Serpine1	-0.316256	0.0948768	0.695764	0	0.58095	0
Anapc5	-1.45478	0.569261	3.19419	0	0.58074	0
Atp1a4	-0.600887	0.0948768	1.67616	0	0.580627	0
Dgkq	-0.221379	0	5.59773	0	0.580369	0
Crebzf	-2.15054	1.45478	3.32069	0	0.579859	0
Zfp704	-0.980394	-0.0316256	4.80709	0	0.579578	0
Mvb12b	-4.64897	0	6.23025	0	0.578198	0
Adck4	-4.39596	0.0316256	4.90197	0	0.578043	0
Ralbp1	-2.18217	0.759015	2.53005	0	0.577951	0
Aph1c	-2.7198	0.126502	1.61291	0	0.577487	0
AY074887	-0.948768	0.347882	2.87793	0	0.577476	0
Tmem236	-0.569261	0.158128	1.3599	0	0.577317	0
Them4	-1.61291	0.50601	2.5933	0	0.576903	0
Ogfod3	-1.96079	0.379507	6.73626	0	0.576704	0
BC031181	-0.537635	0.221379	0.948768	0	0.576415	0
Kif13a	-4.55409	0	5.47123	0	0.576079	0
Terf2	-5.1866	0.0316256	4.49084	0	0.575831	0
Mrpl53	-1.39153	0.442759	2.43517	0	0.575658	0
Tspan15	-0.569261	0.253005	1.01202	0	0.575531	0
Ccnj	-0.253005	0.0316256	0.980394	0	0.575362	0
Msx1	-0.379507	0.0632512	5.85074	0	0.575028	0
Clp1	-5.28148	0.0632512	4.80709	0	0.574677	0
Arl6	-5.09172	0	6.2935	0	0.574497	0
Atn1	-2.24542	0.980394	2.4668	0	0.574136	0
Zfc3h1	-1.99241	0.948768	2.53005	0	0.574024	0
Fam96a	-1.45478	0.442759	2.49842	0	0.573591	0
Apoa1	-4.99685	0	2.75143	0	0.573497	0
Cpt1c	-1.77103	0.79064	2.84631	0	0.573444	0
Plekho1	-5.62936	0.158128	6.98926	0	0.5727	0
Dmp1	-5.50286	0	6.89438	0	0.572477	0
Eif2b2	-1.58128	0.600887	2.65655	0	0.572298	0
Ak1	-0.600887	0.221379	1.20177	0	0.572188	0
Bccip	-1.67616	0.569261	2.81468	0	0.57018	0
Lair1	-5.1866	0	5.85074	0	0.568826	0
Tox4	-3.28906	3.09931	4.39596	0	0.568795	0
Slc19a2	-0.253005	0	5.28148	0	0.568135	0
Ptcra	-0.853892	0	4.49084	0	0.567631	0
Ralgapb	-4.99685	0.0632512	4.74384	0	0.567376	0
Gm5860	-1.54966	0.537635	2.81468	0	0.567175	0
Pmpcb	-1.64453	0.569261	2.84631	0	0.566293	0
Rpusd3	-1.61291	0.284631	6.48325	0	0.566088	0
Cyp2j5	-2.53005	0.822266	2.3403	0	0.56523	0
Hlcs	-5.15498	0.158128	5.24985	0	0.565047	0
Sec61a1	-0.853892	0.316256	1.26502	0	0.56469	0
Actr3	-1.58128	0.727389	2.5933	0	0.564613	0
Drosha	-3.57369	0	5.66099	0	0.564181	0
Mpg	-5.43961	0.189754	5.97724	0	0.563952	0
Thoc2	-1.83429	0.537635	2.65655	0	0.563761	0
Tbce	-3.00443	0.442759	6.79951	0	0.563402	0
Mettl25	-5.1866	0	5.09172	0	0.563017	0
Ghdc	-3.88995	0.221379	4.87034	0	0.562574	0
Hcn2	-4.26946	0	3.03606	0	0.562273	0
Gm9776	-4.14296	4.0797	4.77547	0	0.561468	0
Gm5069	-0.632512	0.253005	1.26502	0	0.560989	0
Foxc1	-0.664138	0.126502	1.4864	0	0.56038	0
P4ha3	-0.347882	0.0948768	0.885517	0	0.559576	0
Slc25a4	-0.379507	0.158128	0.664138	0	0.559447	0
Zfp706	-0.695764	0.284631	1.13852	0	0.559159	0
Tmed3	-0.885517	0.284631	1.80266	0	0.558765	0
Osbpl8	-3.41557	3.25744	4.74384	0	0.55863	0
Gm19522	-0.474384	0.0316256	5.72424	0	0.558349	0
Lap3	-0.79064	0.316256	1.3599	0	0.558319	0
Smarcd2	-4.99685	0.0948768	5.97724	0	0.558002	0
Foxg1	-2.27704	0.569261	2.53005	0	0.557898	0
Pcmtd1	-1.70778	0.727389	2.49842	0	0.557712	0
Ube3c	-3.57369	0	5.97724	0	0.557681	0
Snip1	-5.43961	0.0316256	4.64897	0	0.557241	0
Cops2	-5.85074	0.0632512	6.23025	0	0.557062	0
3200001D21Rik	-2.02404	0.126502	3.85833	0	0.556048	0
Eri2	-5.34473	0.0316256	5.40798	0	0.554523	0
Bdh1	-0.727389	0.284631	1.4864	0	0.554467	0
Psen1	-1.77103	0.885517	2.24542	0	0.554131	0
Foxj3	-5.3131	0.0316256	5.75586	0	0.554103	0
Rabepk	-1.70778	0.411133	3.7002	0	0.553487	0
Aldh16a1	-0.221379	0.0316256	4.52246	0	0.553467	0
Pcnp	-0.632512	0.253005	1.07527	0	0.553208	0
Tfe3	-5.3131	0	6.79951	0	0.55309	0
Babam1	-1.67616	0.853892	2.56167	0	0.553042	0
Ccdc32	-2.40355	0.569261	6.5465	0	0.552525	0
Gigyf2	-3.28906	0.0632512	4.80709	0	0.551743	0
Xrcc5	-5.12335	0.0316256	5.34473	0	0.551688	0
A630033H20Rik	-0.980394	0.126502	1.96079	0	0.551214	0
Cebpzos	-2.02404	0.411133	3.13094	0	0.550933	0
Hsdl1	-0.253005	0.0316256	1.2334	0	0.548758	0
Treml2	-0.253005	0.0316256	0.79064	0	0.548648	0
Bcap29	-1.1069	0.347882	1.86591	0	0.547783	0
Cmip	-4.71222	-0.0632512	6.167	0	0.547485	0
Rnf8	-5.50286	0	5.94562	0	0.547446	0
Sympk	-3.63695	0	5.72424	0	0.546875	0
Haus1	-4.77547	0	6.167	0	0.546801	0
Scara3	-0.664138	0.253005	1.20177	0	0.546639	0
Oat	-0.50601	0.189754	0.822266	0	0.54652	0
Tdrd7	-0.316256	0.0316256	5.24985	0	0.54639	0
Prps1	-1.58128	0.442759	2.78305	0	0.54577	0
Nagk	-4.55409	0.0316256	1.80266	0	0.545742	0
Ston2	-4.26946	0.727389	5.24985	0	0.545737	0
Mylk2	-0.253005	0.0632512	0.50601	0	0.54479	0
Tpd52l1	-5.34473	0.0316256	3.7002	0	0.543905	0
Ift52	-5.15498	0.379507	6.83113	0	0.542883	0
Mgat4c	-0.379507	0.0948768	4.90197	0	0.542629	0
Oxa1l	-1.64453	0.759015	2.49842	0	0.542628	0
Pink1	-1.29665	0.474384	1.58128	0	0.541947	0
Aldh6a1	-0.50601	0.189754	0.885517	0	0.541894	0
9130023H24Rik	-0.442759	0.0948768	5.62936	0	0.541708	0
Nup88	-1.61291	0.600887	2.4668	0	0.541581	0
Cpne8	-0.442759	0.189754	0.79064	0	0.541485	0
4833415N18Rik	-0.79064	0.126502	3.85833	0	0.54133	0
Rpp30	-5.75586	0	7.02089	0	0.540443	0
Gm13830	-0.442759	0.126502	1.42315	0	0.540432	0
Tug1	-0.411133	0.158128	0.727389	0	0.539981	0
Cnn2	-0.347882	0.126502	0.79064	0	0.53976	0
Ttn	-4.87034	0	4.58571	0	0.539743	0
Atp6v0e2	-0.822266	0.158128	2.30867	0	0.539697	0
Ctr9	-0.50601	-0.0316256	5.88236	0	0.538497	0
Gskip	-2.02404	0.885517	2.43517	0	0.538456	0
Gm10190	-0.885517	0.316256	1.67616	0	0.538068	0
Ndufs2	-0.50601	0.189754	0.885517	0	0.537297	0
Pdk3	-4.23783	0	4.71222	0	0.537178	0
Tnfrsf21	-4.80709	0.0632512	4.42759	0	0.536899	0
Ide	-0.885517	0.189754	2.24542	0	0.536479	0
Rbm41	-4.26946	3.88995	4.90197	0	0.536138	0
Actr1a	-1.20177	0.411133	1.92916	0	0.53601	0
B4galt5	-3.7002	1.73941	3.79507	0	0.535865	0
Rbm18	-1.83429	0.948768	2.43517	0	0.535613	0
Narf	-5.53448	0.0316256	6.60975	0	0.534427	0
Map3k2	-5.09172	0	6.19862	0	0.532026	0
A430078G23Rik	-1.61291	0.50601	4.0797	0	0.531995	0
Tmem55a	-0.664138	0.253005	1.20177	0	0.531914	0
Dcaf13	-5.50286	0	6.48325	0	0.531097	0
Rnf130	-1.61291	0.442759	2.84631	0	0.530739	0
Mtmr6	-5.37635	0.158128	6.48325	0	0.53056	0
Bach2	-2.97281	-0.0632512	4.49084	0	0.53012	0
Gpc4	-5.59773	0	6.79951	0	0.530115	0
Lrrc45	-5.37635	0.126502	5.21823	0	0.529905	0
Poli	-0.569261	0.126502	2.53005	0	0.529611	0
1810043G02Rik	-5.78749	0.0316256	6.79951	0	0.529478	0
Ndufa8	-0.569261	0.221379	0.853892	0	0.528674	0
Nrd1	-1.64453	0.759015	2.37192	0	0.528345	0
Ercc2	-5.47123	0	6.64138	0	0.528297	0
Ddx39	-5.53448	-0.0632512	6.64138	0	0.526954	0
Edrf1	-3.13094	0	4.49084	0	0.52645	0
Trmt10a	-3.85833	2.78305	4.68059	0	0.52605	0
Mpp2	-0.316256	0.0632512	0.948768	0	0.525982	0
Tbrg4	-5.53448	0	6.13537	0	0.525447	0
Gria1	-5.59773	0.0316256	6.32512	0	0.525239	0
Gas2l3	-0.727389	0.253005	4.39596	0	0.524725	0
Rnf11	-4.83872	0	5.34473	0	0.524192	0
Tmem126a	-0.822266	0.284631	1.42315	0	0.52376	0
Zswim8	-1.64453	0.759015	2.53005	0	0.523708	0
Trmt11	-4.80709	0.253005	6.45163	0	0.523085	0
Zfp780b	-1.07527	0.126502	4.87034	0	0.522193	0
Etf1	-1.73941	0.664138	2.53005	0	0.522077	0
Idh3a	-0.569261	0.221379	0.980394	0	0.520668	0
Ankfy1	-2.78305	0.0632512	4.9336	0	0.520378	0
Tfpt	-5.09172	0.0632512	5.47123	0	0.519735	0
Dmtf1	-1.86591	0.727389	3.47882	0	0.519144	0
Usp4	-2.05567	0.158128	6.57813	0	0.518967	0
Pfkm	-0.474384	0.189754	0.822266	0	0.518587	0
Pdgfrl	-5.0601	0	6.13537	0	0.517836	0
Arhgef15	-1.80266	0.126502	0.917143	0	0.517384	0
Ldah	-0.822266	0.158128	4.01645	0	0.516973	0
Inpp5a	-4.99685	0	6.38837	0	0.516823	0
Morn2	-4.77547	0	5.85074	0	0.514712	0
Zfp133-ps	-4.9336	0	5.53448	0	0.514055	0
Ctbs	-1.92916	0.569261	6.95764	0	0.514014	0
Pip5k1a	-5.47123	0.158128	6.10374	0	0.513954	0
Cdh19	-0.79064	0.253005	1.64453	0	0.513774	0
Smcr8	-5.28148	0	6.07212	0	0.513757	0
Mcfd2	-1.58128	0.379507	2.49842	0	0.513395	0
Mypop	-4.9336	0.0316256	3.92158	0	0.513132	0
Dmrta1	-0.600887	0.158128	0.759015	0	0.512759	0
Vps11	-1.42315	0.474384	2.24542	0	0.512664	0
1700021K19Rik	-4.96522	0	0.600887	0	0.512663	0
Ube2i	-1.01202	0.253005	1.99241	0	0.512126	0
Bcat2	-2.24542	0.0948768	6.38837	0	0.512107	0
Lppos	-1.96079	0.411133	3.60532	0	0.512021	0
Gltscr1l	-4.9336	0	5.94562	0	0.511972	0
Rhox8	-1.42315	0.189754	2.21379	0	0.511561	0
Tgoln2	-2.30867	0.158128	6.19862	0	0.511539	0
Slc25a40	-0.221379	0	5.66099	0	0.511477	0
Cd276	-4.30108	0	1.32828	0	0.511083	0
Gmps	-3.57369	0.284631	6.57813	0	0.510712	0
Carkd	-1.07527	0.316256	1.70778	0	0.510356	0
Srsf4	-5.56611	0	6.83113	0	0.509615	0
Rbm38	-5.37635	0.0316256	4.71222	0	0.509421	0
Ift80	-1.67616	0.0632512	4.77547	0	0.5094	0
Mrpl51	-0.632512	0.253005	0.948768	0	0.508669	0
Rgs20	-0.537635	0.189754	0.917143	0	0.508488	0
Fblim1	-0.284631	0.0632512	0.569261	0	0.507697	0
Esp6	-0.537635	0.0632512	1.73941	0	0.507491	0
Gipc1	-0.980394	0.316256	1.70778	0	0.506277	0
Unc5c	-1.26502	0.79064	1.77103	0	0.505193	0
Myef2	-0.411133	0.126502	4.39596	0	0.505094	0
Usp39	-4.99685	-0.0316256	6.23025	0	0.504621	0
Nanp	-5.24985	0.0316256	0.569261	0	0.504136	0
Prkaca	-1.45478	0.347882	2.75143	0	0.503208	0
Sord	-5.34473	0.0948768	6.32512	0	0.502807	0
Usp1	-5.0601	0	5.15498	0	0.502666	0
Frmd4a	-1.96079	0.759015	2.27704	0	0.502224	0
Dcaf11	-1.86591	0.284631	2.7198	0	0.502075	0
Stk16	-1.77103	0.600887	3.13094	0	0.501973	0
Nr2e1	-1.01202	0.316256	1.54966	0	0.500934	0
Nfkb1	-0.126502	0	5.47123	0	0.500756	0
Snrpb2	-2.08729	0.885517	2.7198	0	0.500644	0
Khnyn	-0.189754	0	5.97724	0	0.500494	0
Pnpla8	-1.32828	0.50601	2.18217	0	0.49882	0
Arx	-4.26946	0	5.66099	0	0.498236	0
Rps6	-0.664138	0.221379	1.04365	0	0.498083	0
Plxdc2	-0.253005	-0.0316256	1.51803	0	0.497796	0
Neurl2	-4.20621	0.0632512	0.664138	0	0.497787	0
Tsg101	-1.54966	0.442759	2.21379	0	0.497557	0
Txndc12	-1.07527	0.284631	1.51803	0	0.497393	0
Gnptab	-5.43961	0.0316256	4.11133	0	0.497348	0
1700003M07Rik	-0.948768	0.284631	1.70778	0	0.497169	0
Dync1h1	-1.42315	0.379507	3.00443	0	0.496829	0
Eef1b2	-1.92916	0.316256	2.4668	0	0.49647	0
Dad1	-0.474384	0.158128	0.79064	0	0.496162	0
Per2	-5.3131	0.664138	2.75143	0	0.495633	0
Akirin2	-2.87793	0.50601	6.167	0	0.494841	0
Pcmt1	-1.01202	0.316256	1.29665	0	0.494679	0
Tcf12	-1.51803	0.50601	2.49842	0	0.49457	0
Daxx	-4.36433	0	4.17458	0	0.49417	0
Pggt1b	-4.20621	0	4.64897	0	0.493615	0
Necap1	-1.45478	0.379507	2.3403	0	0.4935	0
Hnrnpu	-0.759015	0.253005	1.42315	0	0.492908	0
Mir703	-0.284631	0.0632512	0.537635	0	0.492824	0
Ybx3	-4.74384	0	1.64453	0	0.492285	0
Fam213a	-0.50601	0.158128	0.917143	0	0.492184	0
2210015D19Rik	-5.53448	0	6.42	0	0.492034	0
Maoa	-1.20177	0.253005	4.26946	0	0.491519	0
Caskin1	-0.759015	0.253005	1.20177	0	0.489415	0
Mpst	-1.04365	0	4.83872	0	0.4893	0
Cstf3	-2.11892	0.695764	2.7198	0	0.48893	0
Atf1	-4.20621	-0.158128	6.07212	0	0.488714	0
Asb7	-3.85833	-0.0632512	6.04049	0	0.48832	0
D130020L05Rik	-4.0797	0.0316256	4.80709	0	0.488261	0
Fbxl5	-1.4864	0.474384	2.78305	0	0.487904	0
Mkrn2os	-2.68818	0.0948768	3.13094	0	0.487721	0
Csnk1g1	-3.88995	0.0632512	4.45921	0	0.487526	0
Glcci1	-4.99685	0	5.72424	0	0.48726	0
Large	-0.411133	-0.0316256	6.45163	0	0.487011	0
Cstf2	-5.56611	0	6.35675	0	0.486688	0
Mfsd2a	-0.695764	0.221379	1.01202	0	0.486449	0
Zrsr1	-0.980394	0.253005	4.58571	0	0.486425	0
Mlxip	-4.20621	1.80266	5.50286	0	0.486056	0
Mapk7	-5.09172	0	5.72424	0	0.485812	0
Xndc1	-0.347882	0	5.40798	0	0.485273	0
Cc2d1b	-5.43961	0	0.980394	0	0.4852	0
Samd1	-4.74384	0	4.26946	0	0.485058	0
Adamts2	-0.853892	0.253005	1.61291	0	0.484999	0
Vav3	-5.15498	0	5.62936	0	0.484947	0
Kremen1	-5.37635	0.253005	5.66099	0	0.48433	0
Blmh	-5.66099	0.253005	7.27389	0	0.4838	0
Rpl37rt	-1.13852	0.284631	4.01645	0	0.483366	0
Flt3l	-4.9336	0.0316256	0.695764	0	0.482954	0
Coil	-5.56611	0.0316256	5.3131	0	0.482737	0
Maf	-0.347882	0.0948768	0.569261	0	0.482149	0
Cadm1	-0.569261	0.221379	0.822266	0	0.482068	0
AU023762	-0.917143	0.284631	1.80266	0	0.481121	0
Foxk1	-2.18217	0	5.24985	0	0.48103	0
Gm16796	-0.316256	0.0632512	0.759015	0	0.480985	0
Arl8b	-0.727389	0.221379	1.1069	0	0.480461	0
Auts2	-2.08729	0.853892	2.53005	0	0.480181	0
Ero1l	-5.85074	0	6.64138	0	0.480156	0
Snhg10	-4.64897	0.0948768	4.71222	0	0.479747	0
Asna1	-1.77103	0.50601	2.7198	0	0.479261	0
Fam20a	-0.632512	0.221379	1.04365	0	0.479089	0
Tpmt	-0.632512	0.221379	1.01202	0	0.478583	0
Timm23	-0.569261	0.189754	0.948768	0	0.478192	0
R74862	-4.64897	-0.126502	5.69261	0	0.477715	0
Rbm17	-5.40798	0.126502	5.3131	0	0.477171	0
Arcn1	-1.70778	0.695764	2.53005	0	0.476478	0
5730408K05Rik	-3.25744	0.474384	3.98483	0	0.475879	0
Tmem176a	-0.632512	0.189754	1.17015	0	0.47429	0
Tfip11	-3.7002	0	5.72424	0	0.474102	0
Cox15	-2.68818	0	6.167	0	0.473788	0
Chic1	-4.0797	3.25744	4.30108	0	0.472582	0
Znrd1as	-4.64897	0	5.53448	0	0.472448	0
2900092D14Rik	-0.79064	0.253005	1.32828	0	0.472004	0
D030040B21Rik	-1.04365	0.316256	1.83429	0	0.471943	0
Dusp8	-4.55409	0.0632512	0.569261	0	0.47192	0
Synj2	-0.347882	0.0632512	0.569261	0	0.47108	0
Cpne2	-0.853892	0.284631	1.2334	0	0.470749	0
Prpf4b	-1.73941	0.411133	2.53005	0	0.470632	0
Six5	-3.9532	0	3.41557	0	0.470471	0
Gm6498	-0.316256	0.0948768	0.664138	0	0.470365	0
BC065397	-0.537635	0.0632512	0.50601	0	0.470249	0
9030617O03Rik	-0.379507	-0.0632512	6.2935	0	0.469201	0
Rbm27	-4.74384	0	6.13537	0	0.469181	0
Mcph1	-4.36433	0.0632512	0.632512	0	0.469016	0
Atat1	-1.89754	0.632512	2.94118	0	0.468927	0
Fto	-0.948768	0.221379	1.89754	0	0.468836	0
Tmbim4	-0.569261	0.189754	0.853892	0	0.468349	0
Tnks2	-2.81468	0.632512	6.51488	0	0.468304	0
Wars	-1.92916	0.284631	7.55852	0	0.467769	0
Mob4	-0.569261	0.189754	1.2334	0	0.467715	0
Sucla2	-0.727389	0.221379	1.13852	0	0.467223	0
Mfn1	-0.664138	0.221379	0.948768	0	0.46646	0
Tusc5	-0.727389	0.221379	1.29665	0	0.466064	0
Kdm7a	-3.38394	0.0948768	4.74384	0	0.465729	0
Chchd5	-0.316256	-0.0316256	6.19862	0	0.465626	0
Cox5a	-0.442759	0.158128	0.695764	0	0.464612	0
Slc25a19	-1.61291	0.442759	3.22581	0	0.464386	0
Gm20605	-0.221379	0	5.91399	0	0.464309	0
Arap2	-1.73941	0.537635	2.90956	0	0.464052	0
Nufip2	-0.759015	0.253005	1.1069	0	0.464029	0
Btbd6	-0.284631	0.0316256	0.537635	0	0.463761	0
Flna	-5.62936	0.0316256	5.56611	0	0.463103	0
Cntd1	-2.94118	0.158128	3.16256	0	0.463043	0
4933421O10Rik	-2.94118	0.411133	4.11133	0	0.463038	0
Zfp11	-4.49084	2.87793	4.77547	0	0.462903	0
Glo1	-0.695764	0.221379	0.948768	0	0.462483	0
L3mbtl2	-4.74384	-0.126502	7.30552	0	0.462185	0
Zfp397	-5.24985	-0.0316256	6.42	0	0.461557	0
Pomp	-0.79064	0.221379	1.45478	0	0.46115	0
Galnt7	-4.04808	0	4.68059	0	0.460619	0
Sac3d1	-5.34473	0	0.822266	0	0.460426	0
Adam11	-5.56611	0.0316256	6.48325	0	0.458892	0
Pi4ka	-4.83872	0.316256	5.75586	0	0.458328	0
D030056L22Rik	-5.81911	0.0632512	6.89438	0	0.458129	0
Nnt	-1.83429	0.411133	6.19862	0	0.457647	0
Abcd4	-1.39153	0.316256	2.3403	0	0.457464	0
Atg12	-1.80266	0.600887	2.94118	0	0.457321	0
Gins2	-5.47123	0	0.600887	0	0.456611	0
Gk5	-0.284631	0.0632512	0.50601	0	0.456095	0
Ngrn	-2.27704	0.126502	6.76788	0	0.456081	0
Stub1	-1.04365	0.316256	1.45478	0	0.455596	0
Ddx27	-5.28148	0.158128	5.97724	0	0.455575	0
Cthrc1	-5.12335	0.0632512	4.58571	0	0.455378	0
BC037034	-4.17458	0	5.69261	0	0.455327	0
Slmap	-5.12335	0	5.69261	0	0.455172	0
A730008H23Rik	-4.61734	0	5.47123	0	0.45509	0
Brms1l	-5.34473	0.0316256	2.94118	0	0.454456	0
[truncated: 8,810 more rows]
